# Supplementary material for: What demographic attributes do our digital footprints reveal? A systematic review
Source: PLoS One. 2018 Nov 28;13(11):e0207112. doi: 10.1371/journal.pone.0207112 (PMC6261568; doi:10.1371/journal.pone.0207112)
Supplement: S2 Table — Note: All accuracy measures in this database (and those below) are summarised in ranges (lowest to highest) and are reported to 2 decimal places. This was performed in order to standardise the varied styles of reporting provided in the set of articles. Further, some articles reported their findings as graphs or other visualisations, meaning that we could not extract specific accuracies. In these instances, cells are left blank. For instances where data were simply not reported in an article, we denote this with NR (i.e. Not Reported). (XLSX) [file pone.0207112.s002.xlsx]

## Sheet: Gender
Authors	Year	Classes	Platform	Predictors/Features	No. Users	No. Digital Traces	Top Predictors	Accuracy %	AUC	F-score	Precision	Recall	Classifiers/Methods Used	Article Type	Conference/Journal Title	Quality	Reference
Aarthi, S., Bharanidharan, S., Saravanan, M., & Anand, V International Conference on (pp. 553-554). IEEE.	2011	Female, Male	Smartphones	Call Logs, Network Data, SMS Logs	384		NR	NR					C4.5, CART, SVM	Conference	IEEE Advances in Social Networks Analysis and Mining	B1	Aarthi, S., Bharanidharan, S., Saravanan, M., & Anand, V. (2011, July). Predicting customer demographics in a mobile social network. In Advances in Social Networks Analysis and Mining (ASONAM), 2011 International Conference on (pp. 553-554). IEEE.
Akter, S., & Holder, L.	2017	Female, Male	Smartphones	Audio Environment: Optional Application Usage: User-dowloaded applications, System applications Comunication: Call Logs, SMS Logs Location: GPS, WLA Motion: Accelerometer data Multimedia: Camera, Media Player Proximity: Bluetooth	185		NR	68.79-85.99					SVM	Conference	ACM SIGMOD In Proceedings of the 2nd International Workshop on Network Data Analytics	A/A1	Akter, S., & Holder, L. (2017, May). Using Graphical Features To Improve Demographic Prediction From Smart Phone Data. In Proceedings of the 2nd International Workshop on Network Data Analytics (p. 5). ACM.
Al Zamal, F., Liu, W., & Ruths, D.	2012	Female, Male	Twitter	Friend's Posts: k-top words, k-top stems, k-top digrams and trigrams, k-top co-stems, k-top hashtags, frequency statistics, retweet tendency, neighborhood size Neighborhood policies: all (friends), n-most popular, n-least popular, n-closest Profile Features	384	1000	NR	56.00-80.20					SVM	Conference	ICWSM	B1	Al Zamal, F., Liu, W., & Ruths, D. (2012). Homophily and Latent Attribute Inference: Inferring Latent Attributes of Twitter Users from Neighbors. ICWSM, 270.
Alharbi, A. R., & Thornton, M. A.	2015	Female, Male	Tablet	Actions Keystrokes Timestamps	22	315470	NR	89.23-96.64					C4.5, J48	Conference	IEEE, ICMLA - Machine Learning and Applications	B2/C	Alharbi, A. R., & Thornton, M. A. (2015, December). Demographic Group Classification of Smart Device Users. In Machine Learning and Applications (ICMLA), 2015 IEEE 14th International Conference on (pp. 481-486). IEEE.
Alowibdi, J. S., Buy, U. A., & Yu, P.	2013	Female, Male	Twitter	Names Profile Colours: Background, Text, Link, Sidebar Fill, Sidebar Border Usernames	194293		Female: Green, Light Blue, Pink, Red, Yellow Male: Black, Brown, Dark Blue, Grey, Orange Female: ERJHTH, GAASNKBW, SHEYIHZHH Male: HHJHAO, VAAF, YOWSNDBSH	53.20-82.50					DT, NB, NB-DT	Conference	IEEE, ICMLA - Machine Learning and Applications	B2/C	Alowibdi, J. S., Buy, U. A., & Yu, P. (2013, December). Empirical evaluation of profile characteristics for gender classification on twitter. In Machine Learning and Applications (ICMLA), 2013 12th International Conference on (Vol. 1, pp. 365-369). IEEE.
Alowibdi, J. S., Buy, U. a., & Yu, P. (2013).	2013	Female, Male	Twitter	Profile Colours: Background, Link, Sidebar Border, Sidebar Fill, Text	53326		Female: Green, Pink, Purple, Red Male: Black, Brown, Dark Blue	49.90-71.40		00.61-00.77	00.61-00.84	00.58-00.74	DT, NB-DT Hybrid (NB-Tree), PNN	Conference	IEEE/ACM ASONAM	B4	Alowibdi, J. S., Buy, U. a., & Yu, P. (2013). Language independent gender classification on Twitter. Proceedings of the 2013 IEEE/ACM International Conference on Advances in Social Networks Analysis and Mining - ASONAM ’13, (May), 739–743. https://doi.org/10.1145/2492517.2492632.
Alowibdi, J. S., Buy, U. A., & Philip, S. Y.	2014	Female, Male	Twitter	Profile Colours: Background, Link, Sidebar Border, Sidebar Fill, Text	150000		Female: Cream, Pink, Purple, Red, Yellow Male: Black, Brown, Dark Blue, Grey, Red	58.20-74.20		00.58-00.74	00.59-00.74	00.58-00.74	DT, NB/DT Hybrid (NB-Tree), PNN	Book	Online Social Media Analysis and Visualization	NR	Alowibdi, J. S., Buy, U. A., & Philip, S. Y. (2014). Say it with colors: Language-independent gender classification on twitter. In Online Social Media Analysis and Visualization (pp. 47-62). Springer International Publishing.
Alsmearat, K., Shehab, M., Al-Ayyoub, M., Al-Shalabi, R., & Kanaan, G.	2015	Female, Male	Arabic news websites (e.g. www.khaberni.com, www.sawaleif.com)	Language: Bag-of-words, Sentiment	500		NR	55.30-86.40		00.52-00.86	00.59-00.87	00.55-00.86	DT, KNN, NB, SVM	Conference	ACS/IEEE International Conference on Computer Systems and Applications	B1/C	Alsmearat, K., Shehab, M., Al-Ayyoub, M., Al-Shalabi, R., & Kanaan, G. (2015, November). Emotion analysis of arabic articles and its impact on identifying the author's gender. In Computer Systems and Applications (AICCSA), 2015 IEEE/ACS 12th International Conference of (pp. 1-6). IEEE.
Alsmearat, K., Al-Ayyoub, M., Al-Shalabi, R., & Kanaan, G.	2017	Female, Male	Arabic news websites (e.g. alrai.com, addustour.com, sawaleif.com)	Language: Bag-of-words, Stylometric, Lexical (Words and Characters), Structural, Syntactic, Content	2177		NR	57.30-80.40		00.57-00.80	00.57.00.81	00.57-00.80	ANN, BN, D-Table, J48, KNN (k = 1), Logis, Meta-classifiers (e.g. boosting or bagging), NB, NBM, OneR, PART, RT, RF, SDG, SL, SMO	Journal	Journal of Information Security and Applications	NR	Alsmearat, K., Al-Ayyoub, M., Al-Shalabi, R., & Kanaan, G. (2017). Author gender identification from Arabic text. Journal of Information Security and Applications, 35, 85-95.
Ardehaly, E. M., & Culotta, A.	2017	Female, Male	Twitter	Language: Tweets Profile Image	10500	2100000	NR			00.53-00.95			AO	Unpublished	Unpublished	NR	Ardehaly, E. M., & Culotta, A. (2017). Co-training for Demographic Classification Using Deep Learning from Label Proportions. arXiv preprint arXiv:1709.04108.
Argamon, S., Koppel, M., Pennebaker, J. W., & Schler, J.	2007	Female, Male	Blogs: blogger.com	Language: Content, Stylistic	46947		Female: Auxiliary Verbs, Content Features (conversation, at home, fun, romance, swearing), Conjunctions, Personal Pronouns Males: Articles, Content Features (religion, politics, business, internet), Prepositions	79.30-80.50					BM Log-R, W	Journal	First Monday	Q2	Argamon, S., Koppel, M., Pennebaker, J. W., & Schler, J. (2007). Mining the blogosphere: Age, gender and the varieties of self-expression. First Monday, 12(9). http://dx.doi.org/10.5210/fm.v12i9.2003.
Argamon, S., Koppel, M., Pennebaker, J., & Schler, J.	2009	Female, Male	Blogs: blogger.com	Language: Content, Stylistic	19320		Female: Content Features (cute, love, boyfriend, mom, feel), Style Features (personal pronoun, I, me, him, my) Male: Content Features (system, software, game, based, site), Style Features (determiner, the, of, prepoisition-matter	72.00-76.10					BM Log-R	Journal	Communications of the ACM	Q1	Argamon, S., Koppel, M., Pennebaker, J., & Schler, J. (2009). Automatically Profiling the Author of an Anonymous Text. Communications of the ACM, 52(2), 119–123. https://doi.org/10.1145/1461928.1461959
Baglioni, M., Ferrara, U., Romei, a, Ruggieri, S., & Turini, F.	2003	Female, Male	Web Portal: www.vivacity.it	Access Logs Personal data: Gender, City, Province, Civil Status, Birth Date	11614		NR	54.80			00.83-00.98	00.22-00.60	BAG, BOOST, C4.5, AS, DT, IBL	Conference	AI*IA Congress of the Italian Association for Artificial Intelligence	B/B3	Baglioni, M., Ferrara, U., Romei, a, Ruggieri, S., & Turini, F. (2003). Preprocessing and Mining Web Log Data for Web Personalization. AI*IA 2003: Advances in Artificial Intelligence, 237–249. https://doi.org/10.1007/978-3-540-39853-0_20
Bamman, D., Eisenstein, J., & Schnoebelen, T.	2012	Female, Male	Twitter	Language: Bag-of-words, Lexical Categories (e.g. Named Entities, Taboo Words, Numbers, Hashtags, Punctuation Marks, Dictionary Words)	14464	9212118	Female: CMC Words (lol, omg), Emoticons, Emotion Terms, Hesitation Markers, Pronouns Male: Numbers, Swear Words, Technology Words	88.00					Log-R	Technical Report	NA	NA	Bamman, D., Eisenstein, J., & Schnoebelen, T. (2012). Gender in twitter: Styles, stances. andsocial networks. Technical Report 1210.4567, arXiv.
Bamman, D., Eisenstein, J., & Schnoebelen, T.	2014	Female, Male	Twitter	Language: Lexical Features (e.g. Names, Taboo Words, Numbers, Hashtags, Punctuation, Dictionary)	14464	9212118	Female: Abbreviations (lol, omg), Assent (e.g. okay, yes, yess), Backchannel Sounds (ah, hmmm, ugh, grr), Ellipses, Emoticons, Emotion Terms (sad, love, glad), Exclamation Marks, Expressive Lenghtening (e.g. cooool), Hesitation Words (e.g. um, umm), Kinship Terms (mom, mommy, sister, daughter, aunt, auntie, grandma, kids, child, dad, husband, hubs), Negation Terms (no), Pronouns and Alternative S…	88.00					Log-R	Journal	Journal of Sociolinguistics	Q1	Bamman, D., Eisenstein, J., & Schnoebelen, T. (2014). Gender identity and lexical variation in social media. Journal of Sociolinguistics, 18(2), 135-160. 10.1111/josl.12080.
Barberá, P.	2016	Female, Male	Twitter	Language: Tweets, Emoticons, Twitter Handles	250000	1000000000	Female: love, women, hair, girl, husband, mom, omg, cute, excited, <3, girls, yay, happy, hubby, @TheEllenShow, @khloekardashian, @MileyCirus, @Starbucks, @VictoriaSecret Male: bro, man, wife, good, causewereguys, gay, great, dude, f*ck, nice, game, iphone, church, @SportsCenter, @danieltosh, @MensHealthMag, @AdamSchefter, @ConanOBrien, @KingJames, @katyerry	86.00-88.00			00.85-00.90	00.87-00.88	B	Working paper	NA	NA	Barberá, P. (2016). Less is more? How demographic sample weights can improve public opinion estimates based on Twitter data. Working Paper.
Bayot, R. K., & Gonçalves, T.	2017	Female, Male	Twitter	Language: Tweets	436 (English Dataset) 250 (Spanish Dataset)	277,783 (English Dataset) 208,620 (Spanish Dataset)	NR	61.30-72.10 (English) 50.70-69.30 (Spanish)					CNN, SVM	Conference	In International Workshop on Machine Learning, Optimization, and Big Data	NR	Bayot, R. K., & Gonçalves, T. (2017, September). Age and Gender Classification of Tweets Using Convolutional Neural Networks. In International Workshop on Machine Learning, Optimization, and Big Data (pp. 337-348). Springer, Cham.
Beretta, V., Maccagnola, D., Cribbin, T., & Messina, E.	2015	Female, Male	Twitter	Language: Stylistic, Unigrams	386	8368	NR	93.00-97.00		00.94-00.97 Female 00.91-00.95 Male	00.97-00.98 Female 00.87-00.94 Male	00.91-00.96 Female 00.96-00.97 Male	KNN, NB, NBM	Conference	ACM Conference on Hypertext and Hypermedia	A/A2	Beretta, V., Maccagnola, D., Cribbin, T., & Messina, E. (2015, August). An interactive method for inferring demographic attributes in Twitter. In Proceedings of the 26th ACM Conference on Hypertext & Social Media (pp. 113-122). ACM.
Bergsma, S., Dredze, M., Van Durme, B., Wilson, T., & Yarowsky, D.	2013	Female, Male	Twitter	First Names Last Names Locations	802000		NR	79.50-90.20					SVM	Conference	North American Association for Computational Linguistics	A/A1	Bergsma, S., Dredze, M., Van Durme, B., Wilson, T., & Yarowsky, D. (2013). Broadly Improving User Classification via Communication-Based Name and Location Clustering on Twitter. Hlt-Naacl, (June), 1010–1019.
Bergsma, S., & Van Durme, B.	2013	Female, Male	Twitter	Language: Bag-of-words Usernames	793848		Female (bag of words features): anorexic, belieber, bethca, bf, bridesmaid, cozy, cuddled, fabulous, hubby, hubs, jammies, jewelry, mascara, motherhood, pad, perky, sewing, softball, xox, zumba Female (user features): diva, elle, jen, joy, lady, mom, mrs, ms, jen, kim, mama, mary, pink, wife, woman Male (bag of words features): algebra, brah, boner, boxers, comics, fatherhood, golf, homo, in-laws…	72.00-87.20					Log-R	Conference	North American Association for Computational Linguistics	A/A1	Bergsma, S., & Van Durme, B. (2013, August). Using Conceptual Class Attributes to Characterize Social Media Users. In ACL (1) (pp. 710-720).
Bi, B., Shokouhi, M., Kosinski, M., & Graepel, T.	2013	Female, Male	Bing	Facebook Likes Profile Data (myPersonality Dataset) Search Queries (Bing)	457,000 (myPersonality Dataset) 3,300,000 (Bing Dataset)	122,000 (myPersonality Dataset) 133,000,000 (Bing Dataset)	Sports/Basketball, Games, Sports/Soccer, Shopping/Gifts, Shopping/Jewellery.		00.90-00.84				Log-R with L2 regularization	Conference	International Conference of the World Wide Web	A/A1	Bi, B., Shokouhi, M., Kosinski, M., & Graepel, T. Inferring the Demographics of Search Users. In Proceedings of Proceedings of the 22nd international conference on World Wide Web (pp. 131-140). https://doi.org/10.1145/1835449.1835537
Brdar, S., Culibrk, D., & Crnojevic, V.	2012	Female, Male	Smartphones	Contacts Distance Matrix, GSM, Location (GPS, WLAN), Motion (Accelerometer), Proximity (Bluetooth), Comunication (Call Logs, SMS Logs), Multimedia (Camera, Media Player), Application Usage (User-dowloaded applications, System applications)	80		NR	70.51-83.33		00.53-00.78 Female 00.79-00.87 Male 00.65-00.83 Precision Female 00.72-0.88 Precision Male 00.45-00.79 Recall Female 00.84-00.94 Recall Male	00.65-00.83 Female 00.72-0.88 Male	00.45-00.79 Female 00.84-00.94 Male	KNN, RBFNN, RF	Conference	International Conference on Pervasive Computing	A/A2	Brdar, S., Culibrk, D., & Crnojevic, V. (2012, June). Demographic attributes prediction on the real-world mobile data. In Proc. Mobile Data Challenge by Nokia Workshop, in Conjunction with Int. Conf. on Pervasive Computing, Newcastle, UK.
Burger, J. D., Henderson, J., Kim, G., & Zarrella, G.	2011	Female, Male	Twitter	Username, Full Name, Profile Description, Tweets	183729	4102434	NR	54.30-92.00					BW2, NB, SVM	Conference	Conference on Empirical Methods in Natural Language Processing	A/A1	Burger, J. D., Henderson, J., Kim, G., & Zarrella, G. (2011, July). Discriminating gender on Twitter. In Proceedings of the Conference on Empirical Methods in Natural Language Processing (pp. 1301-1309). Association for Computational Linguistics.
Chaabane, A., Acs, G., & Kaafar, M. A.	2012	Female, Male	Facebook	Likes	104,401 (PubProfiles Dataset) 494,392 (Raw Profiles Dataset) 4,012 (Volunteer Profiles Dataset)		NR	69.00 (Pub Profiles Dataset) 72.50 (Volunteer Profiles Dataset)					LDA	Conference	Usenix Networked and Distributed System Security Symposium	A/A1	Chaabane, A., Acs, G., & Kaafar, M. A. (2012, February). You are what you like! information leakage through users’ interests. In Proceedings of the 19th Annual Network & Distributed System Security Symposium (NDSS).
Chen, X., Wang, Y., Agichtein, E., & Wang, F.	2015	Female, Male	Twitter	Profile Data: Names, Profile Images, Self Descriptions, Social Network Data, Tweets	2000		NR	69.40-83.60		00.70-00.84	00.67-00.86	00.67-00.85	SVM	Conference	AAAI International Conference on Weblogs and Social Media	B1	Chen, X., Wang, Y., Agichtein, E., & Wang, F. (2015). A Comparative Study of Demographic Attribute Inference in Twitter. ICWSM, 15, 590-593.
Cheng, N., Chen, X., Chandramouli, R., & Subbalakshmi, K. P.	2009	Female, Male	Email	Language: Characters, Function Words, LIWC Features, Syntactic Features, Structural Features, Word Features	8970		NR	73.38-82.20		00.79-00.84			RELM	Conference	IEEE Symposium on Computational Intelligence and Data Mining	B3/C	Cheng, N., Chen, X., Chandramouli, R., & Subbalakshmi, K. P. (2009, March). Gender identification from e-mails. In Computational Intelligence and Data Mining, 2009. CIDM'09. IEEE Symposium on (pp. 154-158). IEEE.
Cheng, N., Chandramouli, R., & Subbalakshmi, K. P.	2011	Female, Male	Email; News stories	Language: Gender-Preferential Cues, Psycholinguistic Cues, Stylometric Cues	15739		NR	59.08-85.13					ABDT, BLog-R, SVM	Journal	Digital Investigation	Q2	Cheng, N., Chandramouli, R., & Subbalakshmi, K. P. (2011). Author gender identification from text. Digital Investigation, 8(1), 78-88. https://doi.org/10.1016/j.diin.2011.04.002.
Choi, Y., Kim, Y., Kim, S., Park, K., & Park, J. (2016). An on-device gender prediction method for mobile users using representative wordsets. Expert Systems with Applications, 64, 423-433.	2016	Female, Male	Smartphones	Language (Wordsets)	32	189127	Female: arrangement shelf, baby clothes, Benefit (cosmetic), child, daily bag, delivery fee, dhell, fabric, garden nasturtium, glitter, husband, mind, mom, person, photo, rice cake with black soybean sauce, salon, thinking, we (Korean Translations) Male: aircraft carrier, battle, because, being annoyed, combat plane, dating in Hongdae (a trendy place in Korea), degree, director, MovieGame, MS Pow…			00.56-00.87	00.55-00.92	00.56-00.83	SVM	Journal	Expert Systems with Applications	Q1	Choi, Y., Kim, Y., Kim, S., Park, K., & Park, J. (2016). An on-device gender prediction method for mobile users using representative wordsets. Expert Systems with Applications, 64, 423-433.
Ciot, M., Sonderegger, M., & Ruths, D.	2013	Female, Male	Twitter	Language (French, Japanese, Indonesian, Turkish): Tweets - k-top words, k-top digrams, k-top trigrams, k-top hashtags, k-top mentions Frequencies: retweets, hashtags, links, mentions Network Data: Out/in-neighbourhood size	943 (French) 3,237 (Indonesian) 3,609 (Turkish) 829 (Japanese)	1,000 (Tweets per user)	Female (French): pronouns/basic verbs referring to single person/object Male (French): articles, one noun, prepositions, pronouns or verb forms reffering to a single person or object Female (Indonesian): address or self-reference but more polite Male (Indonesian): nouns related to soccer, address or self-reference words Female (Turkish): pronouns referring to the speaker, a familiar addressee, or…	62.00-90.00					SVM, AO	Conference	Empirical Methods in Natural Language Processing	A/A1	Ciot, M., Sonderegger, M., & Ruths, D. (2013). Gender Inference of Twitter Users in Non-English Contexts. Proceedings of the 2013 Conference on Empirical Methods in Natural Language Processing, (October), 1136–1145.
Claude, F., Konow, R., & Ladra, S.	2016	Female, Male	Blogs Hotel Reviews Social Media Twitter	Language: Content, Stylistic	147 Blogs (English) 88 Blogs (Spanish) 306 Twitter (English) 178 Twitter (Spanish) 7,746 Social Media (English) 1,272 Social Media (Spanish) 4,160 Reviews (Spanish)		NR	49.50-69.83 (Blogs English) 50.48-68.57 (Blogs Spanish) 47.99-67.04 (Twitter English) 46.74-67.29 (Twitter Spanish) 50.00-53.55 (Social Media English) 49.97-62.30 (Social Media Spanish) 48.94-65.53 (Reviews English)					NR	Conference	Spanish Conference on Information Retrieval	NR	Claude, F., Konow, R., & Ladra, S. (2016, June). Fast compressed-based strategies for author profiling of social media texts. In Proceedings of the 4th Spanish Conference on Information Retrieval (p. 14). ACM.
Corney, M., De Vel, O., Anderson, A., & Mohay, G.	2002	Female, Male	Email	Language: Gender-Preferential Features, Structural Characteristics, Style Markers	4369		NR	56.80-71.10					SVM	Conference	Annual Computer Security Applications Conference	A/A1	Corney, M., De Vel, O., Anderson, A., & Mohay, G. (2002). Gender-preferential text mining of e-mail discourse. In Computer Security Applications Conference, 2002. Proceedings. 18th Annual (pp. 282-289). IEEE.
Culotta, A., & Cutler, J.	2016	Female, Male	Twitter, Quantcast	Language: Content Features Network Features	1066		Female: FoodNetwork, Oprah, MarthaStewart, Pinteret, TheEllenShow Male: AdamSchefter, espn, SportsCenter, WIRED			00.66-00.87			ENR, MENR, RR	Journal	Journal of Artifical Intelligence Research	A	Culotta, A., & Cutler, J. (2016). Predicting Twitter User Demographics using Distant Supervision from Website Traffic Data, 55, 389–408.
De Bock, K., & Van den Poel, D.	2010	Female, Male	Belgian websites	Website Features Time/Day Features	4,338 (Survey 1) 5,719 (Survey 2)		NR	59.03-69.33	00.59-00.72				AB, BAG, C4.5, CART, NC, RF	Journal	Fundamenta Informaticae	Q3	De Bock, K., & Van den Poel, D. (2010). Predicting website audience demographics forweb advertising targeting using multi-website clickstream data. Fundamenta Informaticae, 98(1), 49-70.
de Vel, O. Y., Corney, M. W., Anderson, A. M., & Mohay, G. M.	2002	Female, Male	Email	Language: Gender-Preferential Features, Structural Characteristics, Style Markers	4932		NR			00.57-00.71			SVM	Conference	Digital Forensics Research Workshop	NR	de Vel, O. Y., Corney, M. W., Anderson, A. M., & Mohay, G. M. (2002). Language and gender author cohort analysis of e-mail for computer forensics. In Proceedings Digital Forensics Research Workshop (pp. 1–16).
Deitrick, W., Miller, Z., Valyou, B., Dickinson, B., Munson, T., & Hu, W.	2012	Female, Male	Email	Language: Stylometric Features (Character, Syntactic, Word, Function Words) Word Count Features	144	17893	NR	59.53-98.00			00.61-00.96	00.31-00.98	MBWNN	Journal	Communications and network	NR	Deitrick, W., Miller, Z., Valyou, B., Dickinson, B., Munson, T., & Hu, W. (2012). Gender identification on twitter using the modified balanced winnow. Communications and network, 4(03), 189.
Dong, Y., Yang, Y., Tang, J., Yang, Y., & Chawla, N. V.	2014	Female, Male	Smartphones	Call and SMS Data: Individual Features, Friend Features, Circle Features	1, 090,000 (Call Network) 304,000 (SMS Network)	> 1,000,000,000 (Call and Text Message Events)	NR	72.27-80.76 (Call Data) 65.92-75.49 (SMS Data)		00.72-00.81	00.72-00.81		BAG, FGM, GRBFNN, Log-R, NB, RF, SVM	Conference	ACM International Conference on Knowledge Discovery and Data Mining	A	Dong, Y., Yang, Y., Tang, J., Yang, Y., & Chawla, N. V. (2014, August). Inferring user demographics and social strategies in mobile social networks. In Proceedings of the 20th ACM SIGKDD international conference on Knowledge discovery and data mining (pp. 15-24). ACM.
Dong, Y., Chawla, N. V., Tang, J., Yang, Y., & Yang, Y.	2017	Female, Male	Smartphones	Call and SMS Data: Non-Structural Attribute Features, Network Data (Individual Attributes, Friend Attributes, Circle Attributes)	1, 090,000 (Call Network) 304,000 (SMS Network)	> 1,000,000,000 (Call and Text Message Events)	NR			00.72-00.81	00.72-00.81	00.72-00.81	AO, BAG, FGM, GRBFNN, Log-R, MSA, NB, RF, RBFN, SVM	Journal	ACM Transactions on Information Systems	Q1/Q2	Dong, Y., Chawla, N. V., Tang, J., Yang, Y., & Yang, Y. (2017). User Modeling on Demographic Attributes in Big Mobile Social Networks. ACM Transactions on Information Systems (TOIS), 35(4), 35.
Duong, D. T., Pham, S. B., & Tan, H.	2016	Female, Male	Forums (Vietnamese: Webtretho, Otofun, Tinhte)	Character-based Features, Stylometric Features, Word-based Features , Syntactic Features, Content Features		6831	NR	73.31-90.47					BN, J48, SVM	Journal	Recent Developments in Intelligent Information and Database Systems	Q4	Duong, D. T., Pham, S. B., & Tan, H. (2016). Using content-based features for author profiling of Vietnamese forum posts. In Recent Developments in Intelligent Information and Database Systems (pp. 287-296). Springer International Publishing.
Duong, D., Tan, H., & Pham, S.	2016	Female, Male	Product viewing logs (PAKDD Data Mining comptetion 2015)	Temporal Features: (e.g. Day, Month, Duration, Start Time, Ave. Time per Product) Individual Product/Category Features: (Most General Categories, Product Advanced Features: (e.g. No. nodes at each level)	30000		NR	75.20-81.20		00.75-00.81			BN, RF, SVM	Journal	Knowledge and Systems Engineering	NR	Duong, D., Tan, H., & Pham, S. (2016, October). Customer gender prediction based on E-commerce data. In Knowledge and Systems Engineering (KSE), 2016 Eighth International Conference on (pp. 91-95). IEEE.
Eltaher, M., & Lee, J.	2015	Female, Male	Flickr	Tags, Images	215000	148511	NR	74.00-82.00		00.63-00.81	00.55-00.83	00.74-00.82	NB, SVM	Journal	Journal of Advances in Information Technology	NR	Eltaher, M., & Lee, J. (2015). User profiling of flickr: Integrating multiple types of features for gender classification. Journal of Advances in Information Technology Vol, 6(2).
Estival, D.	2008	Female, Male	Email messages	Language: Character Features, Linguistic Features	1,033 (English) 1,030 (Arabic)	9,836 (English) 8,028 (Arabic)	NR	69.26 (English) 81.15 (Arabic)					ABM1, BAG, J48, JRip, IBL, SVM, RF, SVM	Journal	Journal of Science	NR	Estival, D. (2008). Author attribution with email messages. Journal of Science, Vietnam National University, 1, 1-9.
Estival, D., Gaustad, T., Pham, S. B., Radford, W., & Hutchinson, B.	2007	Female, Male	Email messages	Language (TAT Project): Character Features, Structural Features, Lexical Features	1,033 (English) 1,030 (Arabic)	9,836 (English) 8,028 (Arabic)	NR	69.26 (English) 81.15 (Arabic)					ABM1, BAG, J48, JRip, IBL, SVM, RF	Conference	Conference of the Pacific Association for Computational Linguistics	B	Estival, D., Gaustad, T., Pham, S. B., Radford, W., & Hutchinson, B. (2007). Author profiling for English emails. In Proceedings of the 10th Conference of the Pacific Association for Computational Linguistics (pp. 263-272).
Estival, D., Gaustad, T., Pham, S. B., Radford, W., & Hutchinson, B.	2007	Female, Male	Email messages	Language (TAT Project): Language Named Entities (e.g. URLs, Arabic Character Features, Arabic Morpholgy Features), Arabic Lexicon, Word Features	1,033 (English) 1,030 (Arabic)	9,836 (English) 8,028 (Arabic)	NR	69.26 (English) 81.15 (Arabic)					ABM1, BAG, J48, JRip, IBL, RF, SVM	Conference	Australasian Language Technology Association Workshop	B4	Estival, D., Gaustad, T., Pham, S. B., Radford, W., & Hutchinson, B. (2007). TAT: an author profiling tool with application to Arabic emails. In Proceedings of the Australasian Language Technology Workshop (pp. 21-30).
Estival, D., Gaustad, T., Hutchinson, B., Pham, S., Radford, W.	2008	Female, Male	Email messages	Emails (TAT Project): Character Features, Lexical Features, Structural Features	1,033 (English) 1,030 (Arabic)	9,836 (English) 8,028 (Arabic)	NR	69.26 (English) 81.15 (Arabic)					BAG, lBL, RF, SVM	Technical Report	Technical Report	NR	Estival, D., Gaustad, T., Hutchinson, B., Pham, S., Radford, W. (2008). Author Profiling for English and Arabic Emails.
Feng, T., Guo, Y., Chen, Y., Tan, X., Xu, T., Shen, B., & Zhu, W.	2014	Female, Male	PPTV; MovieLens	Video Tags, Video Titles	7,118 (PPTV Dataset) 6,040 (MovieLens Dataset)	154,297 Videos, 277 Tags (PPTV Dataset) 3,883 Movies (MovieLens Dataset)	NR	47.90-70.06		00.17-00.53			BBMM, CP, EM, Log-R, PSSL, SVM	Conference	IEEE International Conference on Communications	A2/B	Feng, T., Guo, Y., Chen, Y., Tan, X., Xu, T., Shen, B., & Zhu, W. (2014, June). Tags and titles of videos you watched tell your gender. In Communications (ICC), 2014 IEEE International Conference on (pp. 1837-1842). IEEE.
Filho JABL, Pasti R, De Castro LN.	2016	Female, Male	Twitter	Language (Portuguese): 60 Textual Meta-Attributes, Tweets	60	187950	Ratio between hapax dislegomena (word that appears only once in a whole text) and the total no. words, Simpson's D measure Ratio between the no. of different words and the total no. words Ratio between the no. sentences starting with uppercase letters (A-Z_ and the total no. sentences)	51.66-81.66			00.60-00.79		BFT, MNB, SVM	Conference	New Advances in Information Systems and Technologies	NR	Filho JABL, Pasti R, De Castro LN. Gender classification of twitter data based on textual meta-attributes extraction. Advances in Intelligent Systems and Computing. 2016. doi:10.1007/978-3-319-31232-3_97
Filippova, K.	2012	Female, Male	YouTube	Language: Comments Social Affiliation Graph (Users and Videos)	6900000		NR	89.00-94.00		00.45-00.80	00.54-00.89	00.39-00.87	ME	Conference	Conference on Empirical Methods in Natural Language Processing	A/A1	Filippova, K. (2012, July). User demographics and language in an implicit social network. In Proceedings of the 2012 Joint Conference on Empirical Methods in Natural Language Processing and Computational Natural Language Learning (pp. 1478-1488). Association for Computational Linguistics.
Fink, C., Kopecky, J., & Morawski, M.	2012	Female, Male	Twitter	Language: LIWC Features, Unigrams, Hash Tags	11155	18500000	Female: aww, babes, bed, birhday, boo, crying, cute, darling, dear, dress, everyone, hair, happy, _happy_, husband, hun, _omg_, _lmao_, miss, sa, serious, _shaking_my_head_soo, thank, yay Male: album, arsenal, baba, boss, boys, brother, chelsea, die, dude, dull, far, fuck, game, guy, man, money, nigga, oga, omo, pin, play, playing, team, united, vs	63.91-80.60		00.56-00.80	00.71-00.83	00.47-00.78	SVM	Conference	ICWSM	B1	Fink, C., Kopecky, J., & Morawski, M. (2012, May). Inferring Gender from the Content of Tweets: A Region Specific Example. In ICWSM.
Flekova, L., Carpenter, J., Giorgi, S., Ungar, L. H., & Preotiuc-Pietro, D.	2016	Female, Male	Twitter	Language: Tweets	11196		NR	82.90					SVM	Conference	Association of Computational Linguistics	A	Flekova, L., Carpenter, J., Giorgi, S., Ungar, L. H., & Preotiuc-Pietro, D. (2016). Analyzing Biases in Human Perception of User Age and Gender from Text. In ACL (1).
Frias-Martinez V, Frias-Martinez E, Oliver N.	2010	Female, Male	Smartphones	Call Logs: No. Calls, Ave Duration, Expenses, In/Out- Degree of Social Network	10000	2000000	NR	70.00-80.00					SVM, RF	Conference	AIII Spring Symposium Series	NR	Frias-Martinez V, Frias-Martinez E, Oliver N (2010) A gender-centric
Gallagher, A. C., & Chen, T.	2008	Female, Male	Flickr	First Names Image Features	339	148	NR	51.40-59.30					SVM	Conference	Computer Vision and Pattern Recognition	A/A1	Gallagher, A. C., & Chen, T. (2008, June). Estimating age, gender, and identity using first name priors. In Computer Vision and Pattern Recognition, 2008. CVPR 2008. IEEE Conference on (pp. 1-8). IEEE.
Grbovic M, Radosavljevic V, Djuric N, Bhamidipati N, Nagarajan A.	2016	Female, Male	Tumblr	Profile Data: Declared Data, Content Features, Action Features	96900000	5100000000	NR				00.81 Female 00.79 Male	00.84 Female 00.69 Male	KNN, Log-R, SG	Conference	# Microposts	NR	Grbovic M, Radosavljevic V, Djuric N, Bhamidipati N, Nagarajan A. Leveraging blogging activity on tumblr to infer demographics and interests of users for advertising purposes. CEUR Workshop Proceedings. 2016.
Goel, S., Hofman, J. M., & Sirer, M. I.	2012	Female, Male	NR	Web Browsing Histories	250000		NR	76.00					SVM	Conference	AAAI International Conference on Weblogs and Social Media	B1	Goel, S., Hofman, J. M., & Sirer, M. I. (2012). Who Does What on the Web:A Large-scale Study of Browsing Behavior. International AAAI Conference on Weblogs and Social Media, 1–8.
Gu, X., Yang, H., Tang, J., Zhang, J., Zhang, F., Liu, D., ... & Fu, X.	2018	Female, Male	Academic researcher emails	Academic Researcher Emails	4528		NR		00.96-00.99 Female 00.96-00.99 Male	00.88-00.96 Female 00.87-00.95 Male	00.86-00.96 Female 00.86-00.96 Male	00.87-00.96 Female 00.83-00.95 Male	AO, RB, RF, Log-R, SVM, CRF	Journal	Social Network Analysis and Mining	Q2	Gu, X., Yang, H., Tang, J., Zhang, J., Zhang, F., Liu, D., ... & Fu, X. (2018). Profiling Web users using big data. Social Network Analysis and Mining, 8(1), 24.
Han, K., Jo, Y., Jeon, Y., Kim, B., Song, J., & Kim, S. W.	2018	Female, Male	Instagram	Activity, Images, Tags	3706	185,300 Images, 177,203 Image Objects, 837,863 Tags	Female Objects: pink, snapshot Female Tags: love, happy, beautiful, summer, finess, cute, tbt, nofilter, blessed, travel Male Objects: vehicle, car Male Tags: love, tbt, art, summer, instagood, fitess, beautiful, happy, nature, nofilter	82.00		0.8			CNN, Log-R, MLP, SVM	Conference	International Conference on User Modelling	B	Han, K., Jo, Y., Jeon, Y., Kim, B., Song, J., & Kim, S. W. (2018, July). Photos Don't Have Me, But How Do You Know Me?: Analyzing and Predicting Users on Instagram. In Adjunct Publication of the 26th Conference on User Modeling, Adaptation and Personalization (pp. 251-256). ACM.
Hazan, I., & Shabtai, A.	2015	Female, Male	Smartphones	Accelerometer Data Applications Data Traffic Data	366		NR	77.60-90.70	00.83-00.97				LMT, NB, J48, REPT, RTF, SVM	Conference	Mobile Software Engineering and Systems	NR	Hazan, I., & Shabtai, A. (2015, May). Noise reduction of mobile sensors data in the prediction of demographic attributes. In Mobile Software Engineering and Systems (MOBILESoft), 2015 2nd ACM International Conference on (pp. 117-120). IEEE.
Hu, J., Zeng, H. J., Li, H., Niu, C., & Chen, Z.	2007	Female, Male	Webpages	Language Features	189480		Female - animals, baby, download, family, food, kids, life, love, movies, music Male - car, chat, girls, internet, money, news, photo, search, software, sports			00.70 Macro F1 00.70 Micro F1 Female 00.71 Micro F1 Male			SVM	Conference	International World Wide Web Conference	A/A1	Hu, J., Zeng, H. J., Li, H., Niu, C., & Chen, Z. (2007, May). Demographic prediction based on user's browsing behavior. In Proceedings of the 16th international conference on World Wide Web (pp. 151-160). ACM.
Ikeda, K., Hattori, G., Ono, C., Asoh, H., & Higashino, T.	2013	Female, Male	Twitter	Tweets	100000		NR			00.69-00.85			SVM	Journal	Knowledge-Based Systems	Q1	Ikeda, K., Hattori, G., Ono, C., Asoh, H., & Higashino, T. (2013). Twitter user profiling based on text and community mining for market analysis. Knowledge-Based Systems, 51, 35-47.
Ito, J., Nishida, K., Hoshide, T., Toda, H., & Uchiyama, T.	2013	Female, Male	Twitter	Profile Data (e.g. No. Followers, Profile Documents) Tweeting Tendencies (e.g. No. Hashtags, URLs) Network Data: (Social Neighbours - others the user has mentioned)	71,129 TwiBlo Users 49,739 Blog Users		NR	65.78-94.37					Log-R L2	Conference	International Conference on Advances in Social Network Analysis and Mining	B4	Ito, J., Nishida, K., Hoshide, T., Toda, H., & Uchiyama, T. (2014). Demographic and Psychographic Estimation of Twitter Users Using Social Structures. In Online Social Media Analysis and Visualization (pp. 27-46). Springer International Publishing.
Ito, J., Hoshide, T., Toda, H., Uchiyama, T., & Nishida, K.	2014	Female, Male	Twitter; Blogs	Description Location No. Tweets Website URL	86,183 TwiBlo Users 65,873 Blog Users		NR	65.78-94.60					Log-R	Book	Online Social Media Analysis and Visualization	NR	Ito, J., Hoshide, T., Toda, H., Uchiyama, T., & Nishida, K. (2013, August). What is he/she like?: Estimating twitter user attributes from contents and social neighbors. In Advances in Social Networks Analysis and Mining (ASONAM), 2013 IEEE/ACM International Conference on (pp. 1448-1450). IEEE.
Jones, R., Kumar, R., Pang, B., & Tomkins, A.	2007	Female, Male	Yahoo! User profiles; Yahoo! Query logs	Query Log Data	744000		Female: bridal, diet, ecards, fanfiction, glitter, hair, knitting, makeup, women's, yoga Male: adult terms, compusa, espn, football, golf, male, nfl, poker, prostate, railroad, ufc, railroad, prostate, wrestling	83.80					SVM	Conference	ACM International Conference on Information and Knowledge Management	A	Jones, R., Kumar, R., Pang, B., & Tomkins, A. (2007, November). I know what you did last summer: query logs and user privacy. In Proceedings of the ACM conference on Sixteenth Conference on information and knowledge management
Jurgens, D., Tsvetkov, Y., & Jurafsky, D.	2017	Female, Male	Twitter	Language: Content Features, Styistic Features		59800	Female: beautiful, christmas, cute, entered, gif, girl, happy, her, love, lovely, mom, she, happy, thank, (most salient words in incoming communication) Male: coach, football, games, his, man, mate, matt, nfl, play, player, players, team, teams (most salient words in incoming communication) Female: emotion words, interjections, pronouns (characteristic cues used by people to signal their own attr…	80.00					RF	Conference	International Workshop on Social Informatics	B4	Jurgens, D., Tsvetkov, Y., & Jurafsky, D. (2017, September). Writer Profiling Without the Writer’s Text. In International Conference on Social Informatics (pp. 537-558). Springer, Cham.
Kabbur, S., Han, EH, & Karypis, G.	2010	Female, Male	Websites	Language: Textual Content Web Page Structure	8215		web page textual content (T)						R	Conference	IEEE International Conference on Data Mining	A/A1	Kabbur, S., Han, EH, & Karypis, G. (2010, December). Content-based methods for web-site predicting demographic attributes. In Data Mining (ICDM), 2010 IEEE 10th International Conference on (pp. 863-868). IEEE.
Kelly, D., Smyth, B., & Caulfield, B.	2013	Female, Male	Smartphones	Location Data	29		NR	89.20					DT, D-Table, SVM, NN, NB, BN	Journal	IEEE Transactions on Human-Machine Systems	Q1/Q2	Kelly, D., Smyth, B., & Caulfield, B. (2013). Uncovering measurements of social and demographic behavior from smartphone location data. IEEE Transactions on Human-Machine Systems, 43(2), 188-198.
Kosinski, M., Stillwell, D., & Graepel, T.	2013	Female, Male	Facebook	Likes	57505		Female: Chiq, Covergirl, Gillette Venus, Shoedazzle, TV Fanatic Male: Band of brothers, ESPN, Modern Warefare 2, Sportscenter, Starcraft.		0.93				Log-R	Journal	PNAS	Q1	Kosinski, M., Stillwell, D., & Graepel, T. (2013). Private traits and attributes are predictable from digital records of human behavior. Proceedings of the National Academy of Sciences of the United States of America, 110(15), 5802–5. https://doi.org/10.1073/pnas.1218772110
Krismayer, T., Schedl, M., Knees, P., & Rabiser, R.	2017	Female, Male	Last.fm	Profile Information Listening Habits	6698		NR	76.31-81.36					BLog-R, DMNB, NB, SLog-R, SVM	Conference	International Workshop on Content-Based Multimedia Indexing	B3	Krismayer, T., Schedl, M., Knees, P., & Rabiser, R. (2017, June). Prediction of User Demographics from Music Listening Habits. In Proceedings of the 15th International Workshop on Content-Based Multimedia Indexing (p. 8). ACM.
Kucukyilmaz, T., Cambazoglu, B. B., Aykanat, C., & Can, F.	2006	Female, Male	Heaven BBS	Stylistic Features	1500	250000	Female: ayy (boy!), byeee (byeee), beeen (I), iyilik (fine), kocam (my husband), kocama (to my husband)mersi (thanks), okulum (my school), sevgilimin (my lover's), suanda (at the moment), Male = abi (brother) baba (fellow), biri (someone), IP (IP), kac (how many), lazim (required), olm (buddy), olmaz (no way), tane (amount), var (exists),	49.20-84.20					BP, CR, KNN, NB	Conference	Advances in Information Systems	C	Kucukyilmaz, T., Cambazoglu, B. B., Aykanat, C., & Can, F. (2006, October). Chat mining for gender prediction. In International Conference on Advances in Information Systems (pp. 274-283). Springer Berlin Heidelberg.
Kucukyilmaz, T., Cambazoglu, B. B., Aykanat, C., & Can, F.	2008	Female, Male	Heaven BBS	Stylistic Features: Character Use, Message Length, Word Length, Punctuation Use, Punctuation Marks, Stopword Use, Stopwords, Smiley Use, Smileys, Vocabulary Richness	1616	218742	Female: ayyy (ohhh!), kocam (my husband), sevgilimin (my lover's) Male: abi (brother), lazim (required), olm (buddy - misspelled)	51.20-82.20					KNN, NB, PRIM, SVM	Journal	Information Processing and Management	Q2	Kucukyilmaz, T., Cambazoglu, B. B., Aykanat, C., & Can, F. (2008). Chat mining: Predicting user and message attributes in computer-mediated communication. Information Processing & Management, 44(4), 1448-1466.
Li, H., Zhu, H., & Ma, D.	2018	Female, Male	Wi-Fi Traffic	Wi-Fi Traffic	28158			66.00-82.00		00.62-00.82	00.61-00.82	00.66-00.82	DT, KNN, Log-R, NB, RF, SVM, XGBoost	Journal	IEEE Transactions on Mobile Computing	Q1	Li, H., Zhu, H., & Ma, D. (2018). Demographic Information Inference through Meta-Data Analysis of Wi-Fi Traffic. IEEE Transactions on Mobile Computing, (5), 1033-1047.
Likarish, P., Brdiczka, O., Yee, N., Ducheneaut, N., & Nelson, L.	2011	Female, Male	World of Warcraft	Character Features Combined Features Player Features Progression Features	1040		1 perc_male_charss – player, 2 fem_male_diff – player, 3 num_male – palyer, 4 num_female – player, 5 char_gender – character, 6 perc_alliance – player, 7 perc_alliance – player, 8 fewest_achievs – player, 9 rel_hugs – player, 10 melee_main_dps – character		00.60-00.84		00.65-00.87	00.65-00.87	C4.5	Conference	Privacy Enhancing Technologies Symposium	NR	Likarish, P., Brdiczka, O., Yee, N., Ducheneaut, N., & Nelson, L. (2011). Demographic Profiling from MMOG Gameplay. HotPETs 2011: Hot Topics in Privacy Enhancing Technologies, 1–19. Retrieved from papers2://publication/uuid/ADFB1218-95B4-449E-AE02-FACC24A91913
Liu, W., & Ruths, D.	2013	Female, Male	Twitter	First Names Language: Tweets, (k-top stems, k-top digrams, k-top trigrams, k-top co-stems, k-top hashtags) Network Data: Neighborhood Size Tweets: Frequency Statistics, Retweeting Tendency	12681	12681000	NR	85.20-87.10					SVM	Conference	AAAI Spring Symposium: Analysing Microtext	NR	Liu, W., & Ruths, D. (2013, March). What's in a Name? Using First Names as Features for Gender Inference in Twitter. In AAAI spring symposium: Analyzing microtext (Vol. 13, p. 01).
Liu, J. Y., & Yang, Y. H.	2012	Female, Male	Last.fm	Context Features: Temporal Patterns Content Features: Song/Artist Meta-data Listening History Song Signal Features	992		Female (Songs/Artist): Heartbeats by the Knife, Staring at the sun by TV on the radio, Street Lights by Kanye West, Wings of words by Chemistry, Male (Songs/Artist): Gimmie more by Britney Spears, Heartless by Kanye West, Love lockdown by Kanye West, The good, the bad, the queen	46.60-66.10					SVM	Conference	ACM Multimedia	A	Liu, J. Y., & Yang, Y. H. (2012, November). Inferring personal traits from music listening history. In Proceedings of the second international ACM workshop on Music information retrieval with user-centered and multimodal strategies (pp. 31-36). ACM.
Liu, Y., Song, H. H., Bermudez, I., Mislove, A., Baldi, M., & Tongaonkar, A.	2015	Female, Male	Smartphones; Websites	Network Traffic Traces	1 (Lab Traffic Dataset) 13,000 (Real ISP Dataset)	9,227 HTTP Flows, 20,810 Tuples (Lab Traffic Dataset) 40,775,119 HTTP Flows, 51,368,712 Tuples (Real ISP Dataset)	NR	NR					AO	Conference	Conference on Online Social Networks	NR	Liu, Y., Song, H. H., Bermudez, I., Mislove, A., Baldi, M., & Tongaonkar, A. (2015, November). Identifying personal information in internet traffic. In Proceedings of the 2015 ACM on Conference on Online Social Networks (pp. 59-70). ACM.
Lu, S., Zhao, M., Zhang, H., Zhang, C., Wang, W., & Wang, H.	2015	Female, Male	Product viewing logs (PAKDD Data Mining comptetion 2015)	Behavioural Features: Duration, Product Frequency Temporal Features: Day, Hour Viewed products	30000		NR			00.90-00.92 Female 00.62-00.70 Male	00.88-00.92 Female 00.68-00.77 Male	00.91-00.95 Female 00.53-00.72 Male	GBDT, RF, SVM	Conference	IEEE/WIC/ACM international Conference on Web Intelligence and Intelligent Agent Technology	C	Lu, S., Zhao, M., Zhang, H., Zhang, C., Wang, W., & Wang, H. (2015, December). Genderpredictor: a method to predict gender of customers from e-commerce website. In Web Intelligence and Intelligent Agent Technology (WI-IAT), 2015 IEEE/WIC/ACM International Conference on (Vol. 3, pp. 13-16). IEEE.
Malmi, E., & Weber, I.	2016	Female, Male	Smartphones	Application Data	3760		Female: Cartwheel by Target, Checkout 51 - Grocery Coupons, Etsy, Period Calendar/Tracker, Period Tracker, Photo Grid - Collage Maker. Pintrest, Wish - Shopping Made Fun Male: Clash of Clans, EPSN, Fallout Shelter, Geek - smarter shopping, Grindr, Tinder, WatchESPN, Yahoo Fantasy Football & More	82.30	0.90				Log-R	Conference	ICWSM	B1	Malmi, E., & Weber, I. (2016, February). You Are What Apps You Use: Demographic Prediction Based on User's Apps. In ICWSM (pp. 635-638).
Miller, Z., Dickinson, B., & Hu, W.	2012	Female, Male	Twitter	Language: ngrams	3000	109228	Female: actually, finally, get, here, hey, night, people, tonight, there, totally, really, whenl lovel :), where Male - ever, every, everyone, everything, I'm, one, right, would	97.60-99.30		00.97-00.99	00.98-1.00	00.94-00.98	Perceptron, NB	Journal	International Journal of Intelligence Science	NR	Miller, Z., Dickinson, B., & Hu, W. (2012). Gender prediction on twitter using stream algorithms with n-gram character features. International Journal of Intelligence Science, 2(04), 143.
Mo, K., Tan, B., Zhong, E., Yang, Q.	2012	Female, Male	Smartphones	Acceleration Application Bluetooth Calendar Call Logs Contacts GSM Media Mediaplay Process Distance System WLAN Visit	80		Fraction of Non-local Calls at Work Days, Time Spent at Work, Variance of Acceleration	69.23-92.30					GBDT, J48, Log-R, Lin-R, RF, SVM	Conference	International Conference on Pervasive Computing	A/A2	Mo K, Tan B, Zhong E, Yang Q. Report of Task 3 : Your Phone Understands You. Mob Data Chall Work. 2012;
Moseley, N., Alm, C. O., & Rege, M.	2014	Female, Male	Twitter	Language: Single Character, Word End, Drop Vowels, Word Begin, You to U, Drop Last Character, Repeat Letter, Contraction, Th to D	66	101496	NR	NR					AAMA	Conference	International Conference on Research Challenges in Information Science	B/B4	Moseley, N., Alm, C. O., & Rege, M. (2014, May). User-annotated microtext data for modeling and analyzing users' sociolinguistic characteristics and age grading. In Research Challenges in Information Science (RCIS), 2014 IEEE Eighth International Conference on (pp. 1-6). IEEE.
Mueller, J., & Stumme, G.	2016	Female, Male	Twitter	Language: No. Syllables, No. Consonants, No. Vowels, Vowel Brightness, Ending Character	6942		Female (words): cute, hair, omg Male (words): bro, league, team Female (stems): bab, feel, girl Male (stems): scor, team, win Female (co-stems): a, I, n Male (co-stems): e, ed, s Female (digrams): aa, ah, ee Male (digrams): er, in, re Female (trigrams) aaa, aha, eee Male (trigrams): ent, ing, ion Female (hashtags): excited, love, sorrynotsorry Male (hashtags): mufc, no, soundcloud	62.10-91.20	00.78-00.91			00.43-00.92	AO, SVM	Conference	Multiinterdisciplinary international social networks conference	NR	Mueller, J., & Stumme, G. (2016). Gender Inference using Statistical Name Characteristics in Twitter. arXiv preprint arXiv:1606.05467.
Mukherjee, A., & Liu, B.	2010	Female, Male	Blogs: blogger.com	F-measure, Factor Analysis, Gender-preferential Features, Stylistic Features, Word Classes	3100		NR	60.73-88.56					NB, SVM, SVMR	Conference	Empirical Methods in Natural Language Processing	A/A1	Mukherjee, A., & Liu, B. (2010, October). Improving gender classification of blog authors. In Proceedings of the 2010 conference on Empirical Methods in natural Language Processing (pp. 207-217). Association for Computational Linguistics.
Murray, D., & Durrell, K.	2000	Female, Male	Web Usage Data	Web Usage Data	83196		NR	72.00-80.00					LSA	Conference	Web Usage Analysis and User Profiling	B/C	Murray, D., & Durrell, K. (2000). Inferring demographic attributes of anonymous Internet users. In Web Usage Analysis and User Profiling (pp. 7-20). Springer Berlin Heidelberg.
Nadeem, S. M. S. J. T., & Weigle, M. C.	2012	Female, Male	Smartphones	Accelerometer Application Bluetooth Calendar Call Log GSM Media Media Play System Wireless LAN	80		NR	76.00-87.00					BAGT, SVM	Journal	GeroScience	NR	Nadeem, S. M. S. J. T., & Weigle, M. C. (2012). Demographic prediction of mobile user from phone usage. Age, 1, 16-21.
Nowson, S., & Oberlander, J.	2006	Female, Male	Blogs	Language: LIWC Features, MRC Psycholinguistic Database, ngrams	71	1950	NR	63.40-91.50			00.33-00.92	00.48-00.92	SVM	Conference	AAAI Spring Symposium: Analysing Microtext	NR	Nowson, S., & Oberlander, J. (2006, March). The Identity of Bloggers: Openness and Gender in Personal Weblogs. In AAAI spring symposium: Computational approaches to analyzing weblogs (pp. 163-167).
Otterbacher, J.	2010	Female, Male	IMDb	Language: Reviews	31300		Female: comic, family, pronouns, relationships, rich vocabulary, verbs, rich vocabulary Male: articles/prepositions, effects, content words, uniqueness, violence General predictive metadata: age, length title (chars), length (words), no. reviews written, total votes, success, utility	64.55-73.71					Log-R	Conference	International Conference on Information and Knowledge Management	A1	Otterbacher, J. (2010). Inferring gender of movie reviewers: Exploiting writing style, content and metadata. Proceedings of the Conference on Information and Knowledge Management (ACM CIKM), 369–378. https://doi.org/10.1145/1871437.1871487
Peersman, C., Daelemans, W., & Van Vaerenbergh, L.	2011	Female, Male	Netlog	Language: Bigrams, Char Bigrams, Char Tetragrams, Char Trigrams, Unigrams	1537283		NR	65.50-88.80		00.66-00.92			SVM	Conference	International Conference on Information and Knowledge Management	A1	Peersman, C., Daelemans, W., & Van Vaerenbergh, L. (2011). Predicting age and gender in online social networks. International Conference on Information and Knowledge Management, Proceedings, 37–44. https://doi.org/10.1145/2065023.2065035
Pham, D. D., Tran, G. B., & Pham, S. B.	2009	Female, Male	Blogs (Vietnamese)	Language: Character, Content, Content Specific, Function Words, Lexicon, Line, Paragraph, Part-of-Speech, Structural, Word	73	3524	NR	45.35-83.34					BAG, BN, J48, IBL, MLP, NB, RF, RT, SMO	Conference	International Conference on Asian Language Processing	NR	Pham, D. D., Tran, G. B., & Pham, S. B. (2009, December). Author profiling for Vietnamese blogs. In Asian Language Processing, 2009. IALP'09. International Conference on (pp. 190-194). IEEE.
Popescu, A., & Grefenstette, G.	2010	Female, Male	Flickr	Tags	30000		Female: cookies, cupcake, cupcakes, haircut, jewelry, necklace, roses, toes, valentinesday, yummy Male: 50mm, canyon, cityscape, hdr, jet, lens, longexposure, panorama, skyscraper, speed	82.90-89.60 (All/US) 77.90-86.10 (All/UK) 77.30-86.10 (All/France) 77.10-85.70 (All/Denmark) 77.00-85.60% (All/Italy) 76.30-85.70% (All/Spanish)					AO	Conference	AAAI International Conference on Weblogs and Social Media	B1	Popescu, A., & Grefenstette, G. (2010). Mining User Home Location and Gender from Flickr Tags. Fourth International AAAI Conference on Weblogs and Social Media, 307–310. https://doi.org/papers3://publication/uuid/7DB41A8E-EE73-4B31-AD14-A9EE2D3C668A
Preotiuc-Pietro, D., Xu, W., & Ungar, L. H.	2016	Female, Male	Twitter	Language: Paraphrases	67337	104500740	NR		00.69-00.78				NB	Conference	Conference on Artificial Intelligence	A/A1	Preotiuc-Pietro, D., Xu, W., & Ungar, L. H. (2016, February). Discovering User Attribute Stylistic Differences via Paraphrasing. In AAAI (pp. 3030-3037).
Qin, Z., Wang, Y., Xia, Y., Cheng, H., Zhou, Y., Sheng, Z., & Leung, V. C.	2014	Female, Male	Smartphones	Application Data	25		NR	69.50-81.21		00.68-00.80 Macro F1 00.62-00.75 Micro F1 Female 00.74-00.85 Micro F1 Male	00.56-00.71 Female 00.81-00.88 Male	00.70-00.80 Female 00.69-00.82 Male	DT, Log-R, NB	Conference	International Conference on Smart Computing	NR	Qin, Z., Wang, Y., Xia, Y., Cheng, H., Zhou, Y., Sheng, Z., & Leung, V. C. (2014, November). Demographic information prediction based on smartphone application usage. In Smart Computing (SMARTCOMP), 2014 International Conference on (pp. 183-190). IEEE.
Radford, J.	2017	Female, Male	Blogs; Twitter; Crowdfunding Essays; Movie Scripts; Professional Writing	Language	200,000 Essays (DonorsChoose Dataset) 30,000 Blogs 397 Professional/Hobbyist Writiing (Brown Dataset) 600 Movies (Movie Dialogue Dataset) Tweets from members of the 112th US Congress (Twitter Dataset)		NR	NR					LDA	Conference	IEEE International Conference on Big Data	NR	Radford, J. (2017, December). Piloting a theory-based approach to inferring gender in big data. In Big Data (Big Data), 2017 IEEE International Conference on (pp. 4824-4826). IEEE.
Rangel, F.	2013	Female, Male	Twitter	Language: Stylistic Features	10,228 10s (English) 51,276 20s (English) 80,044 30s (English) 1,514 10s (Spanish) 25,524 20s (Spanish) 18,392 30s (Spanish)		NR	2.77-56.31 (English) 8.44-61.71 (Spanish)					SVM	Conference	BCS IRSG Symposium: Future Directions in Information Access 2007	NR	Rangel, F. (2013). Author profile in social media: Identifying information about gender, age, emotions and beyond. In Proceedings of the 5th BCS IRSG Symposium on Future Directions in Information Access (pp. 58-60).
Rangel, F., & Rosso, P.	2013	Female, Male	Blogs	Language: Emoticons, Frequencies (ratio between no. unique words and total no. words), Length of Words, No. Capital Letters, No. Words with Flooded characters (e.g. Heeeeellooooo), Punctuation Marks, Part-of-Speech, Words Completely in Capital Letters, Words Starting with a Capital Letter, Spanish Emotion Lexicon	82700		NR	57.13					SVM	Conference	International Workshop on Natural Language Processing and Cognitive Science	B4	Rangel, F., & Rosso, P. (2013). Use of language and author profiling: Identification of gender and age. Natural Language Processing and Cognitive Science, 177.
Rangel, F., & Rosso, P.	2013	Female, Male	Facebook	Language (Spanish): Comments, Emoticons, Frequencies (ratio between no. unique words and total no. words), Puncutation Marks, Part-of-Speech, Spanish Emotion Lexicon		1200	NR	59.00					BN, J48, NB, SVM	Conference	AI*IA Congress of the Italian Association for Artificial Intelligence	B/B3	Rangel, F., & Rosso, P. (2013). On the identification of emotions and authors' gender in facebook comments on the basis of their writing style. In proc.: Emotion and Sentiment in Social and Expressive Media: approaches and perspectives from AI. ESSEM 2013 at XIII Conference of the Italian Association for Artificial Intelligence (pp. 4-6).
Rangel, F., & Rosso, P.	2015	Female, Male	Blogs; Hotel Reviews (Trip Advisor); Social Media; Twitter	EmoGraph with Character 6-grams (emotion labelled graph-based features)	3,376 Social Media (English) 566 Social Media (Spanish) 74 Blogs (English) 54 Blogs (Spanish) 154 Twitter (Engligh) 90 Twitter (Spanish) 821 Hotel Review (English)		NR	73.10 Blogs (English) 64.30 Blogs (Spanish) 72.10 Twitter (English) 73.30 Twitter (Spanish) 53.40 Social Media (English) 68.60 Social Media (Spanish) 66.10% (English) (Reviews)					AB, SLog-R, SVM	Conference	Cross Language Evaluation Forum Workshop	B2	Rangel, F., & Rosso, P. (2015, September). On the multilingual and genre robustness of emographs for author profiling in social media. In International Conference of the Cross-Language Evaluation Forum for European Languages (pp. 274-280). Springer, Cham.
Rangel, F., & Rosso, P.	2016	Female, Male	Blogs	Language: EmoGraph (emotion labelled graph-based features), Emoticons, Frequencies, Morphosyntactic, Punctuation Marks, Semantic Classification of Verbs, Spanish Emotion Lexicon	84,060 (Spanish)		Female: amigos, amor, bueno, corazon, coses, dia, momento, nadie, persona, quiero, vida Male: amor, alguien, anos, bien, cosas, cuenta, dia, dijo, forma, hola, hombre, lado, ver	58.00-63.65					SVM	Journal	Information Processing and Management	Q2	Rangel, F., & Rosso, P. (2016). On the impact of emotions on author profiling. Information processing & management, 52(1), 73-92.
Rangel, F., Rosso, P., Koppel, M., Stamatatos, E., & Inches, G.	2013	Female, Male	Blogs; Chat Logs	Language: Stylistic (e.g. Capital Letters, Emoticons, HTML-based Features, Image URLs or Links, Part-of-Speech Tags, Punctuation Marks, Quotations, Readability) Content (e.g. Bag of Words, Contractions, Dictionary-based Words, Emotion Words, Entropy-based Words, LSA, Sentiment Words, Slang, TF-IDF, Topic-based Words, Character Flooding	283,240 (English) 90,860 (Spanish)		NR	2.77-59.21 (English) 8.44-64.73 (Spanish)					DT, LR, ME, NB, SGD, RF, SVM	Conference	CLEF	B2	Rangel, F., Rosso, P., Koppel, M., Stamatatos, E., & Inches, G. (2013). Overview of the author profiling task at PAN 2013. Notebook Papers of CLEF, 23-26.
Rangel, F., Rosso, P., Chugur, I., Potthast, M., Trenkmann, M., Stein, B., ... & Daelemans, W.	2014	Female, Male	Blogs; Hotel Reviews (Trip Advisor); Social Media; Twitter	Language: Stylistic (Capital Letters, Capital Words, Cleanliness, Correctness, Diversity of Texts, Features Employed in Information Retrieval (IR) (e.g. Cosine Similarity, or Okapi BM25), Documents, HTML Information, Lexical Features, No. Posts Per User, Profiles and Subprofiles, Readability, Relationships Among Terms, Sentiment)	249 Blogs (English) 50,119 Hotel Reviews (English) 11,814 Social Media (English) 490 Twitter (English) 158 Blogs (Spanish) 1,960 Social Media (Spanish) 294 Twitter (Spanish)		NR	50.00-53.90 Social Media (English) 47.54-68.03 Social Media (Spanish) 42.31-67.95 Blogs (English) 42.86-64.29 Blogs (Spanish) 50.00-76.67 Twitter (English) 50.00-88.46 Twitter (Spanish) 47.56-73.17 Hotel Reviews (English)					LR, LB, RTF, MCC, MP, Slog-R, NB, RF, SVM, DT, AO	Conference	CLEF	B2	Rangel, F., Rosso, P., Chugur, I., Potthast, M., Trenkmann, M., Stein, B., ... & Daelemans, W. (2014). Overview of the 2nd author profiling task at pan 2014. In CLEF 2014 Evaluation Labs and Workshop Working Notes Papers, Sheffield, UK, 2014 (pp. 1-30).
Rangel Pardo, F. M., Celli, F., Rosso, P., Potthast, M., Stein, B., & Daelemans, W.	2015	Female, Male	Twitter	Language: Stylistic (Capital Letters, Capital Words, Cleanliness, Correctness, Diversity of Texts, Features Employed in Information Retrieval (IR) (e.g. Cosine Similarity, or Okapi BM25), Documents, HTML Information, Lexical Features, No. Posts Per User, Profiles and Subprofiles, Readability, Relationships Among Terms, Sentiment)	336 (English) 228 (Spanish) 86 (Italian) 76 (Dutch)		NR	50.00-85.92 (English) 55.68-96.59 (Spanish) 41.67-86.11 (Italian) 46.88-96.88% (Dutch Dataset)					SVM, DT, RF J48, RTF, BAG, LDA, Lin-R, Log-R, RR	Conference	CLEF	B2	Rangel Pardo, F. M., Celli, F., Rosso, P., Potthast, M., Stein, B., & Daelemans, W. (2015). Overview of the 3rd Author Profiling Task at PAN 2015. In CLEF 2015 Evaluation Labs and Workshop Working Notes Papers (pp. 1-8).
Rangel, F., Rosso, P., Verhoeven, B., Daelemans, W., Potthast, M., & Stein, B.	2016	Female, Male	Twitter; Social Media; Blogs; Essays; Reviews	Language: Stylistic (e.g. Slang, Capital Letters, Unique Words, ngram Models, Parts-of-Speech, Collocations, LDA, Readability Indexes, Vocabulary Richness, Correctness, Verbosity, TF-IDF, Distributed Representations)	428 Twitter (English) 250 Twitter (Spanish) 384 Twitter (Dutch) 348 Social Media (English) 64 Social Media (Spanish) 78 Blogs (English) 56 Blogs (Spanish) 550 Reviews (Dutch)		NR	46.15-75.64 Blogs (English) 46.23-73.21 Blogs (Spanish) 41.60-61.80 Reviews (Dutch)					RF, J48 LADT, LR, SVM, RBM	Conference	CLEF	B2	Rangel, F., Rosso, P., Verhoeven, B., Daelemans, W., Potthast, M., & Stein, B. (2016). Overview of the 4th author profiling task at PAN 2016: cross-genre evaluations. Working Notes Papers of the CLEF.
Rangel, F., Rosso, P., Potthast, M., & Stein, B.	2017	Female, Male	Twitter	Language: word, character embeddings, TF-IDF ngrams, character and word ngrams, word frequency, slang words, locations, brands, stylistic patterns, top n terms by gain ration, bag f words, 100 most discriminant words per class from a list of 500 topic words, LSA, specific lists of words for language variety, style features, ratios of links, hashtags, user mentions, character flooding, emoticons, …	4,000 (Arabic) 6,000 (English) 7,000 (Spanish) 2,000 (Portuguese)	400,000 (Arabic) 600,000 (English) 700,000 (Spanish) 200,000 (Portuguese)	NR	58.63-80.06 (Arabic) 54.13-82.23 (English) 61.00-87.00 (Portuguese) 63.54-83.21% (Spanish Dataset)					Log-R, RF, SVM, NB, RNN, CNN, DAN	Conference	CLEF	B2	Rangel, F., Rosso, P., Potthast, M., & Stein, B. (2017). Overview of the 5th author profiling task at pan 2017: Gender and language variety identification in twitter. Working Notes Papers of the CLEF.
Rangel, F., Rosso, P., Montes-y-Gómez, M., Potthast, M., & Stein, B.	2018	Female, Male	Twitter	Tweets, Images	2,500 (Arabic) 4,900 (English) 5,200 (Spanish)	250,000 Tweets, 25,000 Images (Arabic) 490,000 Tweets, 49,000 Images (English) 520,000 Tweets, 52,000 Images (Spanish)	NR	64.80-81.70 (Arabic) 55.21-82.21 (English) 64.36-82.00 (Spanish)					RNN, CNN, SVM, Bi-LSTM, NB, DNN, Log-R, SVM, MLP, FFNN	Conference	CLEF	B2	Rangel, F., Rosso, P., Montes-y-Gómez, M., Potthast, M., & Stein, B. (2018). Overview of the 6th author profiling task at pan 2018: multimodal gender identification in Twitter. Working Notes Papers of the CLEF.
Rao, D., & Yarowsky, D.	2010	Female, Male	Twitter	Ngrams, Sociolinguistic Features (e.g. Smileys, OMG, Ellipses, Excitement)	500	405151	Female (posessive features): my_bf, my_daddy, my_husband, my_prof, my_yoga, my_yoghurt, my_zzz Male (possessive features): my_beer, my_gf, my_nigga, my_shorts, my_want, my_wife, my_zipper	68.70-72.33					SVM	Conference	Advances in Neural Information Processing Systems	A	Rao, D., & Yarowsky, D. (2010). Detecting latent user properties in social media. In In Proc. of the NIPS MLSN Workshop.
Rao, D., Yarowsky, D., Shreevats, A., & Gupta, M.	2010	Female, Male	Twitter	Socio-Linguistic Features (e.g. Character Repetition, Elipses, Emoticons, Puzzled Punctuation, OMG, Repeated Exclamation)	1000	405151	Female: my_bf, my_yoga, my_yoghurt, my_husband, my_zzz Male (my_zipper, my_wife, my_gf, my_nigga, my_want, my_beer)	68.70-72.33					SVM	Conference	Conference on Neural Information Processing Systems	A1	Rao, D., Yarowsky, D., Shreevats, A., & Gupta, M. (2010, October). Classifying latent user attributes in twitter. In Proceedings of the 2nd international workshop on Search and mining user-generated contents (pp. 37-44). ACM.
Rao, D., Paul, M. J., Fink, C., Yarowsky, D., Oates, T., & Coppersmith, G.	2011	Female, Male	Facebook	Name Features Ngram Features Socio-linguistic Features (e.g. agreement, disfluencies, ellipses, excitement, omg, puzzled punctuation, repeated alphabets, smileys)	23858	119523	NR	53.90-80.10					NB, SVM, B	Conference	ACM International Conference on Information and Knowledge Management	A/A1	Rao, D., Paul, M. J., Fink, C., Yarowsky, D., Oates, T., & Coppersmith, G. (2011). Hierarchical Bayesian Models for Latent Attribute Detection in Social Media. Icwsm, 11, 598–601.
Roy, A., & Pebesma, E.	2017	Female, Male	Smartphones	Geohashes	60865	3252950	NR	71.62					DT, FPG, Lin-DA	Conference	International Workshop on Social Sensing	NR	Roy, A., & Pebesma, E. (2017, April). A Machine Learning Approach to Demographic Prediction using Geohashes. In Proceedings of the 2nd International Workshop on Social Sensing (pp. 15-20). ACM.
Rustagi, M., Prasath, R. R., Goswami, S., & Sarkar, S.	2009	Female, Male	Blogs: blogger.com	Language: Ave. Length of Sentences, Slang Words	92381		NR	83.60-97.41	00.93 Female 00.93 Male	00.82-00.95 Female 00.85-00.95 Male	1.00-1.00 Female 00.74-00.91 Male	00.70-00.91 Female 1.00-1.00 Male	NB	Conference	International Conference on Pattern Recognition and Machine Intelligence	NR	Rustagi, M., Prasath, R. R., Goswami, S., & Sarkar, S. (2009, December). Learning age and gender of blogger from stylistic variation. In International Conference on Pattern Recognition and Machine Intelligence (pp. 205-212). Springer Berlin Heidelberg.
Sakaki, S., Miura, Y., Ma, X., Hattori, K., & Ohkuma, T.	2014	Female, Male	Twitter	Images Text	3800	760000	NR	64.21-85.11		00.67-00.86 Female 00.66-00.84 Male	00.72-00.85 Female 00.65-00.85 Male	00.62-00.87 Female 00.67-00.84 Male	SVM	Conference	International Conference on Computational Linguistics	A/A1	Sakaki, S., Miura, Y., Ma, X., Hattori, K., & Ohkuma, T. (2014). Twitter user gender inference using combined analysis of text and image processing. V&L Net, 2014, 54.
Sap, M., Park, G., Eichstaedt, J. C., Kern, M. L., Stillwell, D., Kosinski, M., … Schwartz, H. A.	2014	Female, Male	Facebook	Words and Weights (mypersonality Dataset)	75394	300000000	NR	76.30-91.90					ENR, SVM, LASSO	Conference	Conference on Empirical Methods in Natural Language Processing	A/A1	Sap, M., Park, G., Eichstaedt, J. C., Kern, M. L., Stillwell, D., Kosinski, M., … Schwartz, H. A. (2014). Developing Age and Gender Predictive Lexica over Social Media. Empirical Methods in Natural Language Processing (EMNLP), 1146–1151. https://doi.org/10.1109/IRI.2014.7051893
Sarawgi, R., Gajulapalli, K., & Choi, Y.	2011	Female, Male	Blogs: blogspot.com nytimes.com scientific papers wordpress.com	Language: Experiments 1/2 (Blogs), Experiment 3 (Blogs/Papers), Experiments 4/5 (Papers)	280 Blogs 200 Scientific Papers		NR	37.50-71.30 All (Experiment 1) 06.40-74.80 Female (Experiment 1) 53.40-72.10 Male (Experiment 1) 30.00-80.00% All (Experiment 2) 00.00-100% Female (Experiment 2) 15.00-100% Male (Experiment 2) 31.50-61.50% All (Experiment 3) 00.00-61.00% Female (Experiment 3) 59.00-99.00% Male (Experiment 3) 31.50-76.00% All (Experiment 4) 00.00-100% Female (Experiment 4) 40.00-100% Male (Experiment 4) 31.50-91.5…		00.45-00.65			NR	Conference	Conference on Natural Language Learning	A/B1	Sarawgi, R., Gajulapalli, K., & Choi, Y. (2011, June). Gender attribution: tracing stylometric evidence beyond topic and genre. In Proceedings of the Fifteenth Conference on Computational Natural Language Learning (pp. 78-86). Association for Computational Linguistics.
Sarraute, C., Blanc, P., & Burroni, J.	2014	Female, Male	Smartphones	Duration of Calls, No. Calls, No. Contact Days, No. SMS, In/Out Degree Social Network, Degree of Social Network	90000000		get	66.30-81.40					SVM, Lin-DA, Log-R, NB, QDA	Conference	International Conference on Advances in Social Network Analysis and Mining	B4	Sarraute, C., Blanc, P., & Burroni, J. (2014, August). A study of age and gender seen through mobile phone usage patterns in mexico. In Advances in Social Networks Analysis and Mining (ASONAM), 2014 IEEE/ACM International Conference on (pp. 836-843). IEEE.
Sarraute, C., Brea, J., Burroni, J., & Blanc, P.	2015	Female, Male	Smartphones	Duration of Calls, In/Out-degree of Social Network, No. Calls, No. Contact Days, No. SMS	500000		NR	66.30-81.40					SVM, Log-R, NB	Journal	Social Network Analysis and Mining	Q2	Sarraute, C., Brea, J., Burroni, J., & Blanc, P. (2015). Inference of demographic attributes based on mobile phone usage patterns and social network topology. Social Network Analysis and Mining, 5(1), 1-18.
Schwartz, H. A., Eichstaedt, J. C., Kern, M. L., Dziurzynski, L., Ramones, S. M., Agrawal, M., … Ungar, L. H.	2013	Female, Male	Facebook	Language: Topic Instances, Phrases, Words	74859	700000000	Female: <3, adorable, baby, besties, can't_wait, excited, love, shopping, soo, tomorrow, tonight, wonderful Male: battle, championship, football, fuck, game, government, himself, playing, team, world_cup, youtube.com,	78.40-91.90					SVM	Journal	Plos One	Q1	Schwartz, H. A., Eichstaedt, J. C., Kern, M. L., Dziurzynski, L., Ramones, S. M., Agrawal, M., … Ungar, L. H. (2013). Personality, Gender, and Age in the Language of Social Media: The Open-Vocabulary Approach. PLoS ONE, 8(9). https://doi.org/10.1371/journal.pone.0073791
Seneviratne, S., Seneviratne, A., Mohapatra, P., & Mahanti, A.	2015	Female, Male	Smartphones	Category, Content, Item, Numeric		218, 4167	Female: advisor, child, crush, décor, pencil, pregnanc, sweet, sweetest Male: catalan, kernel, flac, network, offlin, scrobbl, sidebar, trail, viewer	49.30-75.00	00.67-00.76 Female 00.50-00.80 Male		00.70-00.85	00.62-00.77	NB, SVM	Newsletter	ACM SIGMOBILE Mobile Computing and Communications Review	NR	Seneviratne, S., Seneviratne, A., Mohapatra, P., & Mahanti, A. (2015). Your installed apps reveal your gender and more!. ACM SIGMOBILE Mobile Computing and Communications Review, 18(3), 55-61.
Shigenaka, R., Tsuboshita, Y., & Kato, N.	2016	Female, Male	Twitter	Images	3683	13525	NR			00.75-00.77	00.75-00.77	00.76-00.77	EB, LB, MTBM	Conference	IEEE International Symposium on Multimedia	B2/C	Shigenaka, R., Tsuboshita, Y., & Kato, N. (2016, December). Content-Aware Multi-task Neural Networks for User Gender Inference Based on Social Media Images. In Multimedia (ISM), 2016 IEEE International Symposium on (pp. 169-172). IEEE.
Sloan, L., Morgan, J., Housley, W., Williams, M., Edwards, A., Burnap, P., & Rana, O.	2017	Female, Male	Twitter	Tweets	4328		NR						NR	Journal	Social Media and Society	Q1	Sloan, L., Morgan, J., Housley, W., Williams, M., Edwards, A., Burnap, P., & Rana, O. (2013). Knowing the tweeters: Deriving sociologically relevant demographics from Twitter. Sociological research online, 18(3), 1-11.
Sloan, L., & Morgan, J.	2015	Female, Male	Twitter	Tweets	30,030,446 (Dataset 1) 23,789,264 (Dataset 2)		NR						NR	Journal	Plos One	Q1	Sloan, L., & Morgan, J. (2015). Who tweets with their location? Understanding the relationship between demographic characteristics and the use of geoservices and geotagging on Twitter. PloS one, 10(11), e0142209.
Sloan, L.	2013	Female, Male	Twitter	Tweets	13260819	113,88,224	NR						NR	Journal	Sociological Research Online	Q2	Sloan, L. (2017). Who tweets in the United Kingdom? Profiling the Twitter population using the British social attitudes survey 2015. Social Media+ Society, 3(1), 2056305117698981.
Solomon, A., Bar, A., Yanai, C., Shapira, B., & Rokach, L.	2018	Female, Male	Smartphones	GPS Sensor Data	45 (Sherlock dataset) 81	6,219,330 (Sherlock Dataset) 185,032		51.11-86.67 (Sherlock Dataset) 55.55-79.01 (CARS Dataset)					Log-R, NB. DT, SVM, RF	Conference	Conference on User Modelling, Adaptation and Personalization	B1	Solomon, A., Bar, A., Yanai, C., Shapira, B., & Rokach, L. (2018, July). Predict Demographic Information Using Word2vec on Spatial Trajectories. In Proceedings of the 26th Conference on User Modeling, Adaptation and Personalization(pp. 331-339). ACM.
Tang, C., Ross, K., Saxena, N., & Chen, R.	2010	Female, Male	Facebook	Names	1282563		NR	52.80-96.30					NB	Conference	Database Systems for Advanced Applications	A	Tang, C., Ross, K., Saxena, N., & Chen, R. (2011). What’s in a name: a study of names, gender inference, and gender behavior in facebook. Database Systems for Adanced Applications, 344-356.
Ugheoke, T. O., & Saskatchewan, R.	2014	Female, Male	Twitter	Linguistic Content, Network Data, Tweeting Behaviour		30000	NR	79.80-95.30	00.81-00.95	00.79-00.95	00.86-00.95	00.80-00.95	SVM	Masters Thesis	Masters Thesis	NR	Ugheoke, T. O., & Saskatchewan, R. (2014). Detecting the gender of a tweet sender. M. Sc. Project Report, Department of Computer Science, University of Regina, Regina.
Ulges, A., Koch, M., & Borth, D.	2012	Female, Male	YouTube	Content, Colour, Visual Words		14000	NR						SVM	Conference	ACM International Conference on Multimedia Retrieval	A2/B	Ulges, A., Koch, M., & Borth, D. (2012, June). Linking visual concept detection with viewer demographics. In Proceedings of the 2nd ACM International Conference on Multimedia Retrieval (p. 24). ACM.
van de Loo, J., De Pauw, G., & Daelemans, W.	2016	Female, Male	Netlog	Language: Bigrams, Tetragrams, Trigrams		379769	NR	61.30-69.50		00.67-00.69 Macro F1			SVM	Journal	International Journal of Cyber-Security and Digital Forensics	NR	van de Loo, J., De Pauw, G., & Daelemans, W. (2016). Text-based age and gender prediction for online safety monitoring. International Journal of Cyber-Security and Digital Forensics (IJCSDF), 5(1), 46-60.
Verhoeven, B., Daelemans, W., & Plank, B.	2016	Female, Male	Twitter	Language: Bigrams, Tetragrams, Trigrams	411 (German) 490 (Italian) 1,000 (Dutch) 1,405 (French) 4,090 (Portuguese) 10,772 (Spanish)	952,549 (German) 932,785 (Italian) 2,083,484 (Dutch) 2,786,589 (French) 8,833,132 (Portuguese) 18,547,622 (Spanish)	NR			00.82 (Dutch) 00.83 (French) 00.78 (German) 00.73 (Italian) 00.88 (Portuguese) 00.88 (Spanish)	00.83 (Dutch) 00.84 (French) 00.78 (German) 00.74 (Italian) 00.88 (Portuguese) 00.88 (Spanish)	00.83 (Dutch) 00.83 (French) 00.78 (German) 00.73 (Italian) 00.88 (Portuguese) 00.88 (Spanish)	Lin-SVC, Log-R	Conference	International Conference on Language Resources and Evaluation	A2	Verhoeven, B., Daelemans, W., & Plank, B. (2016). TwiSty: A Multilingual Twitter Stylometry Corpus for Gender and Personality Profiling. In LREC.
Verhoeven, B., Škrjanec, I., & Pollak, S.	2017	Female, Male	Twitter	Language: Lemmas, Ngrams, Stems, Words	8,749 3,490	1,749,800 698,000	NR	87.90-92.60		00.87-00.93	00.88-00.93	00.88-00.93	Lin-SVC	Conference	Balto-Slavic Natural Language Processing,	NR	Verhoeven, B., Škrjanec, I., & Pollak, S. (2017). Gender Profiling for Slovene Twitter Communication: The Influence of Gender Marking, Content and Style. BSNLP 2017, 119.
Vijayaraghavan, P., Vosoughi, S., & Roy, D.	2017	Female, Male	Twitter	Followers Name Profile Description Profile Picture Tweets	9960		NR			00.82-00.89 Macro F1			DMMMT, RF, SVM	Conference	Annual Meeting of the Association for Computational Linguistics	A1	Vijayaraghavan, P., Vosoughi, S., & Roy, D. (2017). Twitter Demographic Classification Using Deep Multi-modal Multi-task Learning. In Proceedings of the 55th Annual Meeting of the Association for Computational Linguistics (Volume 2: Short Papers) (Vol. 2, pp. 478-483).
Volkova, S., & Bachrach, Y.	2015	Female, Male	Twitter	Language: Lexical, Negation, Postags, Stylistic	123513	24919528	NR		0.90				Log-R	Journal	Cyberpsychology, Behaviour and Social Networking	Q1	Volkova, S., & Bachrach, Y. (2015). On Predicting Sociodemographic Traits and Emotions from Communications in Social Networks and Their Implications to Online Self-Disclosure. Cyberpsychology, Behavior and Social Networking, 18(12), 726–36. https://doi.org/10.1089/cyber.2014.0609
Volkova, S., & Yarowsky, D.	2014	Female, Male	Twitter	Language: Bigrams, Ngrams, Trigrams	12,600 (English) 7,500 (Spanish)	1,000,00	Female: boyfriend, cute, doll, girl, love, justin + bieber, people, phone, princess, sexy Male: baseball, bro, bromance, dude, football, gamblig, gym, love, money, music, nbs, news, nigga, sports	66.00-75.00 English					AO, Log-R	Conference	Advances in Neural Information Processing Systems	A/A1	Volkova, S., & Yarowsky, D. (2014, December). Improving gender prediction of social media users via weighted annotator rationales. In NIPS 2014 Workshop on Personalization.
Volkova, S., Wilson, T., & Yarowsky, D.	2013	Female, Male	Twitter	Language: Emoticons, Hashtags, Lexical	184,000 (English)	2,958,103 804,000	NR			00.69-00.80 (English) 00.65-00.68 (Russian) 00.68-00.72 (Spanish)	00.69-00.80 (English) 00.65-00.68 (Russian) 00.72-00.74 (Russian) 00.68-00.72 (Spanish) 00.62-00.65 (Spanish)	00.83-00.94 (English) 00.72-00.74 (Russian) 00.62-00.65 (Spanish)	Log-R	Conference	Conference on Empirical Methods in Natural Language Processing	A1/A	Volkova, S., Wilson, T., & Yarowsky, D. (2013). Exploring Demographic Language Variations to Improve Multilingual Sentiment Analysis in Social Media. In EMNLP (pp. 1815-1827).
Volkova, S., Bachrach, Y., & Van Durme, B.	2016	Female, Male	Twitter	Content (From Tweets) Context (Learned From User Interests)	4129	825800	NR		00.76-00.90				Log-R	Conference	IEEE Second International Conference on Big Data Computing Service and Applications	NR	Volkova, S., Bachrach, Y., & Van Durme, B. (2016, March). Mining user interests to predict perceived psycho-demographic traits on Twitter. In Big Data Computing Service and Applications (BigDataService), 2016 IEEE Second International Conference on (pp. 36-43). IEEE.
Wang, P., Sun, F., Wang, D., Tao, J., Guan, X., & Bifet, A.	2015	Female, Male	Smartphones	Application Name, Arrival Time, Foreground Time, Response Time to Applications	25		NR	54.67-86.50		00.55-00.86 Macro F1 00.55-00.87 Micro F1 Female 00.55-00.85 Micro F1 Male	00.57-00.89 Female 00.53-00.89 Male	00.52-00.90 Female 00.55-00.83 Male	SVM	Book	Big Data and Computing Communications	NR	Wang, P., Sun, F., Wang, D., Tao, J., Guan, X., & Bifet, A. (2017, April). Inferring Demographics and Social Networks of Mobile Device Users on Campus From AP-Trajectories. In Proceedings of the 26th International Conference on World Wide Web Companion (pp. 139-147). International World Wide Web Conferences Steering Committee.
Wang, P., Sun, F., Wang, D., Tao, J., Guan, X., & Bifet, A.	2017	Female, Male	Smartphones	AP Trajectory	51903		NR			00.63-00.72	00.62-00.71	00.63-00.72	Log-R, SVM	Conference	International World Wide Web Conference	A/A1	Wang, P., Sun, F., Wang, D., Tao, J., Guan, X., & Bifet, A. (2018). Predicting Attributes and Friends of Mobile Users From AP-Trajectories. Information Sciences.
Wang, Y., Tang, Y., Ma, J., & Qin, Z.	2018	Female, Male	Smartphones	AP Trajectory	51903		NR			00.60-00.70	00.61-00.72	00.62-00.73	PCA, NNMF, HOSVD, NNTF	Journal	Information Sciences	Q1	Wang, Y., Tang, Y., Ma, J., & Qin, Z. (2015). Gender Prediction Based on Data Streams of Smartphone Applications. In Y. Wang, H. Xiong, S. Argamon, X. Y. Li, & J. Z. Li (Eds.), Big Data Computing and Communications (Vol. 9196, pp. 115-125).
Weinsberg, U., Bhagat, S., Ioannidis, S., & Taft, N.	2012	Female, Male	Flixter; Movielens	Movie Ratings	34,200 (Flixter) 6,000 (MovieLens)	5,800,000 Ratings, 17,000 Movies (Flixter) 1,000,000 Ratings, 3,700 Movies (MovieLens)	Female (Flixter): Broken Bridges, Dracula - Dea and Loving It, Drunen Master, Something the Lord Made, Young Indiana Jones Male (Flixter): Beautiful Thing, Birth, Eating Out, Latter Days, Mimic, Prince of Darkness	00.10-76.50 Flixster 00.60-80.20 Movielens	0.72 -0.84 Flixter 0.81-0.86 Movielens		00.70-00.76 (Flixster) 00.78-00.80 (Movielens)	00.70-00.77 (Flixter) 00.76-00.80 (Movielens)	BNB, CP, Log-R, MNB, SVM	Conference	ACM International Conference on Recommender Systems	B/B1	Weinsberg, U., Bhagat, S., Ioannidis, S., & Taft, N. (2012, September). BlurMe: Inferring and obfuscating user gender based on ratings. In Proceedings of the sixth ACM conference on Recommender systems (pp. 195-202). ACM.
Weiss, G. M., & Lockhart, J. W.	2011	Female, Male	Smartphones	Ave. Acceleration Value, Ave. Absolute Difference, Ave. Resultant Acceleration, Binned Distribution, Time Between Peaks, Standard Deviation	70		NR	57.60-71.20					DT, J48, IBL, KNN, MLP	Conference	Knowledge Discovery from Sensor Data Workshop, ACM	NR	Weiss, G. M., & Lockhart, J. W. (2011, August). Identifying user traits by mining smart phone accelerometer data. In Proceedings of the Fifth International Workshop on Knowledge Discovery from Sensor Data (pp. 61-69). ACM.
Weren, E. R., Kauer, A. U., Mizusaki, L., Moreira, V. P., de Oliveira, J. P. M., & Wives, L. K.	2014	Female, Male	Blogs	Correctness, Information Retrieval Features, No. Characters, No. Sentences, No. Words, Readability Tests (Flesch-Kincaid), Sentiment, Style	236000		Female: cosine_avg, cosine_count, cosine_sum, okapi_avg, okapi_count, okapi_sum Male: cosine_count, okapi_count, okapi_sum	53.50-62.10	00.53-00.61	00.53-00.61			B, BAG, DT, J48, KNN, NN, R, SVM	Journal	Journal of Information and Data Management	NR	Weren, E. R., Kauer, A. U., Mizusaki, L., Moreira, V. P., de Oliveira, J. P. M., & Wives, L. K. (2014). Examining multiple features for author profiling. Journal of information and data management, 5(3), 266.
Wu, M. J., Jang, J. S. R., & Lu, C. H.	2014	Female, Male	Last.fm	Meta-data: Artist Name, Tracks (Most Frequently Listened To), Song Title	145210		NR	78.21-78.87					GMM, GSV, LSI, SVM, SVMR, UMB	Conference	International Conference on Music Information Retrieval	A1	Wu, M. J., Jang, J. S. R., & Lu, C. H. (2014). Gender Identification and Age Estimation of Users Based on Music Metadata. In ISMIR (pp. 555-560).
Yan, X., & Yan, L.	2006	Female, Male	Xanga	Background Colours, Emoticons, Punctuation Marks, Unigrams, Word Cases, Word Font	3000	75000	Female: barbie, fabulous, jewelry, kissme, layed, make-up, muah Male: badass, furious, income, nba, poet, psst, wasup		00.07-00.68	00.07-00.68	00.40-00.65	00.54-00.71	NB	Conference	AAAI Spring Symposium: Computational Approaches to Analysing Weblogs	NR	Yan, X., & Yan, L. (2006, March). Gender Classification of Weblog Authors. In AAAI Spring Symposium: Computational Approaches to Analyzing Weblogs (pp. 228-230).
Ying, J. J., Chang, Y., Huang, C., & Tseng, V. S.	2012	Female, Male	Smartphones	Behavioural Features, Environment Features	80		NR	82.05-85.47					R, DS	Conference	International Conference on Pervasive Computing	A/A2	Ying, J. J., Chang, Y., Huang, C., & Tseng, V. S. (2012). Demographic Prediction Based on User ’ s Mobile Behaviors. Nokia, 2012(1), 1–6.
You, Q., Bhatia, S., Sun, T., & Luo, J.	2014	Female, Male	Pintrest	Images	160		NR	00.66-00.72	00.65-00.72	00.65-00.72	00.66-00.72	00.66-00.72	Log-R	Conference	International Conference on Data Mining Workshop	NR	You, Q., Bhatia, S., Sun, T., & Luo, J. (2014, December). The eyes of the beholder: Gender prediction using images posted in online social networks. In Data Mining Workshop (ICDMW), 2014 IEEE International Conference on (pp. 1026-1030). IEEE.
Zhang, C., & Zhang, P.	2010	Female, Male	Blogs (e.g. Blogger.com, techorati.com)	Language: Ave. Sentence Length, Ave. Word Length, Part-of-Speech tags, Word Factor Analysis (e.g. Conversation, At Home, Family)	3226		NR	50.93-72.10					NB, LDA, SVM	Technical Report	Technical Report	NR	Zhang, C., & Zhang, P. (2010). Predicting gender from blog posts. University of Massachussetts Amherst, USA.
Zhong, E., Tan, B., Mo, K., & Yang, Q.	2013	Female, Male	Smartphones	Acceleration, Application, Bluetooth, Calendar, Call Logs, Contacts, Distance, Media, Media Play, Process, WLAN, Visit (Three Most Frequently Visited Places)	80		4th most visited timezone, no. acceleration records at 5.00pm, variance of acceleration	69.23-92.30					GBDT, J48, SVM, Log-R, RF, SVM	Journal	Pervasive and Mobile Computing	Q1	Zhong, E., Tan, B., Mo, K., & Yang, Q. (2013). User demographics prediction based on mobile data. Pervasive and Mobile Computing, 9(6), 823-837.
Zhong, Y., Yuan, N. J., Zhong, W., Zhang, F., & Xie, X.	2015	Female, Male	Sina Weibo	Check-ins	3354918	81781544	NR		00.73-00.87	00.69-00.82	00.69-00.84	00.69-00.81	Log-R, SVM, LambdaMART	Conference	International Conference on Web Search and Data Mining	B	Zhong, Y., Yuan, N. J., Zhong, W., Zhang, F., & Xie, X. (2015, February). You are where you go: Inferring demographic attributes from location check-ins. In Proceedings of the eighth ACM international conference on web search and data mining(pp. 295-304). ACM.
