# Supplementary material for: What demographic attributes do our digital footprints reveal? A systematic review
Source: PLoS One. 2018 Nov 28;13(11):e0207112. doi: 10.1371/journal.pone.0207112 (PMC6261568; doi:10.1371/journal.pone.0207112)
Supplement: S3 Table — (XLSX) [file pone.0207112.s003.xlsx]

## Sheet: Age
Authors	Year	Classes	Platform	Predictors/Features	No. Users	No. Digital Traces	Top Predictors	Accuracy %	AUC	F-score	Precision	Recall	Classifiers/Methods Used	Article Type	Conference/Joural Title	Quality	Reference	Column3	Column4	Column5	Column6	Column7	Column8	Column9	Column10	Column11	Column12
Akter & Holder	2017	Under 16, 16-21, 22-27, 28-33, 33-38, 39-44, 45-50, Over 50	Smartphones	Application Use: Downloaded Apps, System Apps Audio Environment: Optional Comunication: Call Logs, SMS Logs Location: GPS WLAN Motion: Accelerometer Proximity: Bluetooth Multimedia: Camera, Media Player	185		NR	50.00-66.45					SVM	Conference	ACM SIGMOD In Proceedings of the 2nd International Workshop on Network Data Analytics	A/A1	Akter, S., & Holder, L. (2017, May). Using Graphical Features To Improve Demographic Prediction From Smart Phone Data. In Proceedings of the 2nd International Workshop on Network Data Analytics (p. 5). ACM.
Al Zamal, F., Liu, W., & Ruths, D.	2012	18-23, 25-30	Twitter	Language, Friends Posts (Network Neighbours), Profile Features: Frequency Statistics, k-top co-stems, k-top digrams and trigrams, k-top hashtags, k-top stems, k-top words, Neighborhood Size, Retweets Neighborhood Policies All (friends): n-closest, n-least popular, n-most popular	384	384000	NR	61.90-80.50					SVM	Conference	ICWSM	B1	Al Zamal, F., Liu, W., & Ruths, D. (2012). Homophily and Latent Attribute Inference: Inferring Latent Attributes of Twitter Users from Neighbors. ICWSM, 270.
Alharbi, A. R., & Thornton, M. A.	2015	Under 18, 19-23, 24-29, 30-35, 36-41, 42-47, 48-53	Tablet	Actions, Keystrokes, Timestamps	22	315470	NR	79.72-93.15					C4.5, DT J48	Conference	IEEE, ICMLA - Machine Learning and Applications	B2/C	Alharbi, A. R., & Thornton, M. A. (2015, December). Demographic Group Classification of Smart Device Users. In Machine Learning and Applications (ICMLA), 2015 IEEE 14th International Conference on (pp. 481-486). IEEE.
Ardehaly, E. M., & Culotta, A.	2015	Under 25, Over 25	Twitter	Language: Description Field, Follower Accounts, Hashtags, Name Field, Tweet Text	1436	287200	Under 25 (County): athens, techm uga, virginia, georgia Under 25 (Follow): altpress, colourlovers, hotnewhiphop, planetminecrat, me Under 25 (Name): kathering, diana, me, my, this Over 25 (County): airport, nashvillescene at theonion Over 25 (Follow): newobserver, baseballamerica, breakingnews, higshaven Over 25 (Name): debra, lori, sandra, janet, no desc	48.40-84.30					MLog-R	Conference	Conference of the North American Chapter of the Association for Computational Linguistics: Human Language Technologies	A1	Ardehaly, E. M., & Culotta, A. (2015). Inferring latent attributes of Twitter users with label regularization. North American Chapter of the Association of Computational Linguistics.
Ardehaly, E. M., & Culotta, A.	2018	Under 25, Over 25	IMDB Twitter	Demographics, Names, Social Network Followers	1436	287200	NR	72.00-77.50					AO, Log-R, RANSAC, RR	Journal	Social Network Analysis and Mining	Q2	Ardehaly, E. M., & Culotta, A. (2018). Learning from noisy label proportions for classifying online social data. Social Network Analysis and Mining, 8(1), 2.
Argamon, S., Koppel, M., Pennebaker, J. W., & Schler, J.	2007	13-17, 18-22, 23-27, 28-32, 33-37, 38-42, 43-47, Over 48	Blogs: blogger.com	Language: Content, Stylistic	46947		Younger: at home, auxiliary verbs, conjunctions, conversation, fun, parts-of-speech, personal pronouns, romance, swearing Older: articles, business, internet, politics, prepositions, religion	67.70-77.40					BM Log-R, W	Journal	First Monday	Q2	Argamon, S., Koppel, M., Pennebaker, J. W., & Schler, J. (2007). Mining the blogosphere: Age, gender and the varieties of self-expression. First Monday, 12(9). http://dx.doi.org/10.5210/fm.v12i9.2003.
Argamon, S., Koppel, M., Pennebaker, J., & Schler, J.	2009	13-17, 23-27, 33-47	Blogs: blogger.com	Language: Content, Stylistic	19320		Teens (Content): bored, hah, lol, school, wanna Teen (Style): cant, im, ont, so, thats Twenties (Content): apartment, bar, job, office, work Twenties (Style): determiner, in, of, preposition, the Thirties (Content): children, daughter, husband, wife Thirties (Style): determiner, in, of, preposition, the	66.90-77.70					BM Log-R	Journal	Communications of the ACM	Q1	Argamon, S., Koppel, M., Pennebaker, J., & Schler, J. (2009). Automatically Profiling the Author of an Anonymous Text. Communications of the ACM, 52(2), 119–123. https://doi.org/10.1145/1461928.1461959
Barberá, P.	2016	18-25, 26-40, 40+	Twitter	Language: Tweets, Emoticons, Twitter Handles	250000	1000000	18-25: class, college, semester, life, sportscenter, campus, best, literally, like, haha, professor, studying, @SportsCenter, @wizkhalifa, @MileyCyrus, @danieltosh, @instagram, @UberFacts 26-40: excited, work, amazing, bar, awesome, wedding, pretty, ppl, bday, time, yay, office, game, tonight, @danieltosh, @ConanOBrien, @jtimerlake, @chelseahandler > 40: great, daugher, son, nice, r, good, ok, ki…	72.00-85.00			00.62-00.72	00.43-00.78	B	Working paper	NA	NA	Barberá, P. (2016). Less is more? How demographic sample weights can improve public opinion estimates based on Twitter data. Working Paper.
Bayot, R. K., & Gonçalves, T.	2017	18-24, 25-34, 35-49, 50-64, Over 65	Twitter	Language: Tweets	436 (English) 250 (Spanish)	277,783 (English) 208,620 (Spanish)	NR	39.70-49.60 (English) 48.10-56.00 (Spanish)					CNN, SVM	Conference	In International Workshop on Machine Learning, Optimization, and Big Data	NR	Bayot, R. K., & Gonçalves, T. (2017, September). Age and Gender Classification of Tweets Using Convolutional Neural Networks. In International Workshop on Machine Learning, Optimization, and Big Data (pp. 337-348). Springer, Cham.
Beretta, V., Maccagnola, D., Cribbin, T., & Messina, E.	2015	Under 30, Over 30	Twitter	Language: Stylistic Features, Unigrams	386	8368	NR	59.00-64.00 (Dataset A) 59.00-65.00 (Dataset B) 60.00-66.00 (Dataset C)					KNN, NB, NBM, SVM	Conference	ACM Conference on Hypertext and Hypermedia	A/A2	Beretta, V., Maccagnola, D., Cribbin, T., & Messina, E. (2015, August). An interactive method for inferring demographic attributes in Twitter. In Proceedings of the 26th ACM Conference on Hypertext & Social Media (pp. 113-122). ACM.
Bi, B., Shokouhi, M., Kosinski, M., & Graepel, T.	2013	10-18, 19-24, 25-34, 35-49, Over 50	Bing	Facebook Likes, Profile Data (mypersonality Dataset), Search Queries (Bing)	457,000 (myPersonality Dataset) 3,000,000 (Bing Dataset)	122,000 (myPersonality Dataset) 133,000,000 (Bing Dataset)	Arts/Movies, Computers/Data_Communications, Computers/Software, Games, Shopping/Toys_and_Games						Log-R L2	Conference	International Conference of the World Wide Web	A/A1	Bi, B., Shokouhi, M., Kosinski, M., & Graepel, T. Inferring the Demographics of Search Users. In Proceedings of Proceedings of the 22nd international conference on World Wide Web (pp. 131-140). https://doi.org/10.1145/1835449.1835537
Brdar, S., Culibrk, D., & Crnojevic, V.	2012	Continuous Variable	Smartphones	Accelerometer, Application Events, Bluetooth, Calendar, Call Logs, Contacts, Distance Matrix, GSM, Media, Media Play	80		NR						KNN, RBFNN, RF	Conference	International Conference on Pervasive Computing	A/A2	Brdar, S., Culibrk, D., & Crnojevic, V. (2012, June). Demographic attributes prediction on the real-world mobile data. In Proc. Mobile Data Challenge by Nokia Workshop, in Conjunction with Int. Conf. on Pervasive Computing, Newcastle, UK.
Brea, J., Burroni, J., Minnoni, M., & Sarraute, C.	2014	Under 25, 25-34, 35-50, Over 50	Smartphones	Call Data, SMS Data	500000		NR	62.00-72.00					RDA	Conference	International Conference on Advances in Social Network Analysis and Mining	B4	Brea, J., Burroni, J., Minnoni, M., & Sarraute, C. (2014, August). Harnessing mobile phone social network topology to infer users demographic attributes. In Proceedings of the 8th Workshop on Social Network Mining and Analysis (p. 1). ACM.
Chaabane, A., Acs, G., & Kaafar, M. A.	2012	13-17, 18-24, 25-34, Over 35	Facebook	Interests	104,401 (PubProfiles Dataset) 494,392 (Raw Profiles Dataset) 4,012 (Volunteer Profiles Dataset)		NR	49.00 (Pub Profiles) 42.00 (Volunteer Profiles)					LDA	Conference	Usenix Networked and Distributed System Security Symposium	A/A1	Chaabane, A., Acs, G., & Kaafar, M. A. (2012, February). You are what you like! information leakage through users’ interests. In Proceedings of the 19th Annual Network & Distributed System Security Symposium (NDSS).
Chen, L., Qian, T., Wang, F., You, Z., Peng, Q., & Zhong, M.	2015	18-22, 28-32, 38-42, 48-52	Sina Weibo	Language: Lexical, Stylistic, Syntactic	2000		Young Adults (Syntactic): Adjective Phrases, Exclamation, Interjection, Special Purpose Verb, Time Related Phrase	54.47-88.72					SVM	Conference	AAAI International Conference on Weblogs and Social Media	B1	Chen, L., Qian, T., Wang, F., You, Z., Peng, Q., & Zhong, M. (2015, June). Age Detection for Chinese Users in Weibo. In International Conference on Web-Age Information Management (pp. 83-95). Springer International Publishing.
Chen, X., Wang, Y., Agichtein, E., & Wang, F.	2015	Teenager, Young Adult, Adult (no further detail reported)	Twitter	Names Profile Images Self-Descriptions Social Networks Tweets	2000		NR		00.58-00.67	00.47-00.60	00.49-00.61	00.46-00.60	SVM	Conference	ICWSM	B1	Chen, X., Wang, Y., Agichtein, E., & Wang, F. (2015). A Comparative Study of Demographic Attribute Inference in Twitter. ICWSM, 15, 590-593.
Claude, F., Konow, R., & Ladra, S.	2016	18-24, 25-34, 35-49, 50-64, Over 65	Blogs, Hotel Reviews, Social Media, Twitter	Language: Content, Stylistic	147 Blogs (English) 88 Blogs (Spanish) 306 Twitter (English) 178 Twitter (Spanish) 7,746 Social Media (English) 1,272 Social Media (Spanish) 4,160 Reviews (Spanish)			3.50-44.50 Blogs (English) 5.08-47.62 Blogs (Spanish) 2.58-42.32 Twitter (English) 3.33-46.04 Twitter (Spanish) 0.18-35.77 Social Media (English) 2.52-39.57 Social Media (Spanish) 8.65-31.32 Reviews (Spanish)					NR	Conference	Spanish Conference on Information Retrieval	NR	Claude, F., Konow, R., & Ladra, S. (2016, June). Fast compressed-based strategies for author profiling of social media texts. In Proceedings of the 4th Spanish Conference on Information Retrieval (p. 14). ACM.
Culotta, A., & Cutler, J.	2016	18-24, 25-34, 35-44, 45-54, 55-64, Over 65	Twitter, Quantcast	Language: Textual Content Social Network Data	1066		18-24: IGN, PlayStation, Steam_games, RockstarGames, Ubisoft 25-34: azizansari, lenadunhamm mindykaling, louisck, WIRED 35-44: andersoncooper, BarackObama, cnnbrk, Oprah, TMZ 45-54: ABC, AP, CNN, cnnbrk, FoxNews 55-64: AP, cnnbrk, FoxNews, WhiteHouse, WSJ Over 65: AP, cnnbrk, DRUDGE_REPORT, FoxNews, WSJ						ENR, MENR, RR	Journal	Journal of Artifical Intelligence Research	A	Culotta, A., & Cutler, J. (2016). Predicting Twitter User Demographics using Distant Supervision from Website Traffic Data, 55, 389–408.
De Bock, K., & Van den Poel, D.	2010	12-17, 18-24, 25-34, 45-54, Over 55	Belgian Websites	Time/Day Features, Website Data	4,338 (Survey 1) 5,719 (Survey 2)		NR	26.56-37.14	00.66-00.76				AB, BAG, C4.5, CART, NC, RF	Journal	Fundamenta Informaticae	Q3	De Bock, K., & Van den Poel, D. (2010). Predicting website audience demographics forweb advertising targeting using multi-website clickstream data. Fundamenta Informaticae, 98(1), 49-70.
Dey, R., Tang, C., Ross, K., & Saxena, N.	2012	Birth Year	Facebook	Profile Data, Social Links: High School Graduation Year, Friends' High School Graduating Class	1370834		NR						Lin-R	Conference	Annual Joint Conference of the IEEE Computer and Communications Societies	A/A1	Dey, R., Tang, C., Ross, K., & Saxena, N. (2012, March). Estimating age privacy leakage in online social networks. In INFOCOM, 2012 Proceedings IEEE (pp. 2836-2840). IEEE.
Dong, Y., Yang, Y., Tang, J., Yang, Y., & Chawla, N. V.	2014	18-24, 25-34, 35-49, Over 49	Smartphones	Call and SMS Data, Network Data: Circle Attributes, Friend Attributes, Individual Attributes, Nonstructural Attribute Features	1,090,000 (Call Network) 304,000 (SMS Network)	1,000,000,000 (Call/SMS Events)	NR	62.24-71.40 (Call Data) 65.88-73.03 (SMS Data)		00.62-00.71 (Call Data) 00.64-00.62 (SMS Data)	00.62-00.73 (Call Data) 00.63-00.74 (SMS Data)		BAG, FGM, GRBFNN, Log-R, SVM, NB, RF	Conference	ACM International Conference on Knowledge Discovery and Data Mining	A	Dong, Y., Yang, Y., Tang, J., Yang, Y., & Chawla, N. V. (2014, August). Inferring user demographics and social strategies in mobile social networks. In Proceedings of the 20th ACM SIGKDD international conference on Knowledge discovery and data mining (pp. 15-24). ACM.
Dong, Y., Chawla, N. V., Tang, J., Yang, Y., & Yang, Y.	2017	18-24, 25-34, 35-49 Over 49	Smartphones	Call and SMS Data, Network Data: Circle Attributes, Friend Attributes, Individual Attributes, Nonstructural Attribute Features	1,090,000 (Call Network) 304,000 (SMS Network)	1,000,000,000 (Call/SMS Events)	NR			00.62-00.71 (Call Data) 00.64-00.73 (SMS Data)	00.62-00.73 (Call Data) 00.63-00.74 (SMS Data)	00.62-00.71 (Call Data) 00.66-00.73 (SMS Data)	AO, BAG, FGM, Log-R, SVM, NB, RF, RBFNN, GRBFNN, MSA	Journal	ACM Transactions on Information Systems	Q1/Q2	Dong, Y., Chawla, N. V., Tang, J., Yang, Y., & Yang, Y. (2017). User Modeling on Demographic Attributes in Big Mobile Social Networks. ACM Transactions on Information Systems (TOIS), 35(4), 35.
Duong, D. T., Pham, S. B., & Tan, H.	2016	Under 22, 24-27, Over 32	Forums (Vietnamese: Webtretho, Otofun, Tinhte)	Character-based Features, Stylometric Features, Word-based Features , Syntactic Features, Content Features		6831	NR	52.03-63.96					BNET, J48, SVM	Journal	Recent Developments in Intelligent Information and Database Systems	Q4	Duong, D. T., Pham, S. B., & Tan, H. (2016). Using content-based features for author profiling of Vietnamese forum posts. In Recent Developments in Intelligent Information and Database Systems (pp. 287-296). Springer International Publishing.
Estival, D.	2008	Under 25, 25-35, Over 35	Email	Language: Character, Linguistic	1,033 (English) 1,030 (Arabic)	9,836 (English) 8,028 (Arabic)	NR	56.46					ABM1, BAG, J48, JRip, IBL, SVM, RF	Journal	Journal of Science	NR	Estival, D. (2008). Author attribution with email messages. Journal of Science, Vietnam National University, 1, 1-9.
Estival, D., Gaustad, T., Pham, S. B., Radford, W., & Hutchinson, B.	2007	Under 25, 25-35, Over 35	Email	Language (TAT Project): Character, Lexical, Structural	1,033 (English) 1,030 (Arabic)	9,836 (English) 8,028 (Arabic)	NR	56.46					ABM1, BAG, J48, JRip, IBL, RF, SVM	Conference	Conference of the Pacific Association for Computational Linguistics	B	Estival, D., Gaustad, T., Pham, S. B., Radford, W., & Hutchinson, B. (2007). Author profiling for English emails. In Proceedings of the 10th Conference of the Pacific Association for Computational Linguistics (pp. 263-272).
Estival, D., Gaustad, T., Pham, S. B., Radford, W., & Hutchinson, B.	2007	Under 25, 25-35, Over 35	Email	Language (TAT Project): Character, Lexicon, Morphology, URLs, Word	1,033 (English) 1,030 (Arabic)	9,836 (English) 8,028 (Arabic)	NR	72.10 (Arabic) 56.46 (English)					ABM1, BAG, J48, JRip, IBL, SVM, RF	Conference	Australasian Language Technology Association Workshop	B4	Estival, D., Gaustad, T., Pham, S. B., Radford, W., & Hutchinson, B. (2007). TAT: an author profiling tool with application to Arabic emails. In Proceedings of the Australasian Language Technology Workshop (pp. 21-30).
Estival, D., Gaustad, T., Hutchinson, B., Pham, S., Radford, W.	2008	Under 25, 25-35, Over 35	Email	Language (TAT Project): Character, Lexical, Structural	1,033 (English) 1,030 (Arabic)	9,836 (English) 8,028 (Arabic)	NR	72.10 (Arabic) 56.46 (English)					BAG, IBL, SVM, RF, SMO	Technical Report	Technical Report	NR	Estival, D., Gaustad, T., Hutchinson, B., Pham, S., Radford, W. (2008). Author Profiling for English and Arabic Emails.
Filippova, K.	2012	13-19, 20-29, Over 30	YouTube	Language: Comments Network: Social Affiliation Graph (users and videos)	6900000		NR	89.00 (13-19) 89.00 (20-29) 87.00 (Over 30) 89.00% (Overall)		00.87 (13-19 Female) 00.76 (20-29 Female) 00.62 (Over 30 Female) 00.78 (Overall Female) 00.90 (13-19 Male) 00.94 (20-29 Male) 00.94 (Over 30 Male) 00.94 (Overall Male)			ME	Conference	Conference on Empirical Methods in Natural Language Processing	A/A1	Filippova, K. (2012, July). User demographics and language in an implicit social network. In Proceedings of the 2012 Joint Conference on Empirical Methods in Natural Language Processing and Computational Natural Language Learning (pp. 1478-1488). Association for Computational Linguistics.
Flekova, L., Carpenter, J., Giorgi, S., Ungar, L. H., & Preotiuc-Pietro, D.	2016	Continuous Variable	Twitter	Language: Tweets	11196		NR						SVM	Conference	Association of Computational Linguistics	A	Flekova, L., Carpenter, J., Giorgi, S., Ungar, L. H., & Preotiuc-Pietro, D. (2016). Analyzing Biases in Human Perception of User Age and Gender from Text. In ACL (1).
Flekova, L., Ungar, L., & Preotiuc-Pietro, D.	2016	Continuous Variable	Twitter	Language: Readability, Style, Surface (Length of weets in words and characters, Length of words), Syntax	4279	574095	NR						Lin-R, SVMR	Conference	Association of Computational Linguistics	A	Flekova, L., Ungar, L., & Preotiuc-Pietro, D. (2016, August). Exploring stylistic variation with age and income on twitter. In Proceedings of the 54th Annual Meeting of the Association for Computational Linguistics, ACL (pp. 313-319).
Gallagher, A. C., & Chen, T.	2008	Under 5, 18-41, Over 42	Flickr	First Names Image Features	304 (Set A) 32 (Set B) 105 (Set C) 339 (Overall)	134 (Set A) 14 (Set B) 48 (Set C) 148 (Overall)	NR	47.90-59.40					SVM	Conference	Computer Vision and Pattern Recognition	A/A1	Gallagher, A. C., & Chen, T. (2008, June). Estimating age, gender, and identity using first name priors. In Computer Vision and Pattern Recognition, 2008. CVPR 2008. IEEE Conference on (pp. 1-8). IEEE.
Goel, S., Hofman, J. M., & Sirer, M. I.	2012	Under 25, Over 25	NR	Web Browsing Histories	250000		NR	80					SVM	Conference	AAAI International Conference on Weblogs and Social Media	B1	Goel, S., Hofman, J. M., & Sirer, M. I. (2012). Who Does What on the Web:A Large-scale Study of Browsing Behavior. International AAAI Conference on Weblogs and Social Media, 1–8.
Guimaraes, R. G., Rosa, R. L., De Gaetano, D., Rodriguez, D. Z., & Bressan, G.	2017	13-20, Over 20, General	Twitter	Gender Language: Character, Hashtags, Mentions, Punctuation, Retweets, Slang, Topic, Tweets, URL Network: Follow, Followers Teenager		6280	NR						ANN, DT, RF, SVM	Journal	IEEE Access	Q1	Guimaraes, R. G., Rosa, R. L., De Gaetano, D., Rodriguez, D. Z., & Bressan, G. (2017). Age Groups Classification in Social Network Using Deep Learning. IEEE Access.
Han, K., Lee, S., Jang, J. Y., Jung, Y., & Lee, D.	2016	13-19, 30-39	Instagram	Content (e.g. Locations, Tags), Interactions (e.g. Comments, Likes), Network (e.g. Follows)	45,000 (13-19 Dataset) 45,000 (30-39 Dataset)		NR	58.80-82.40	00.60-00.89		00.70-00.83	00.73-00.87	ABDT, Log-R, SVM, RF	Conference	ACM Conference on Web Science	NR	Han, K., Lee, S., Jang, J. Y., Jung, Y., & Lee, D. (2016, May). Teens are from mars, adults are from venus: analyzing and predicting age groups with behavioral characteristics in instagram. In Proceedings of the 8th ACM Conference on Web Science (pp. 35-44). ACM.
Han, K., Jo, Y., Jeon, Y., Kim, B., Song, J., & Kim, S. W.	2018	10s, 20s, 30s, 40s, 50s	Instagram	Activity, Images, Tags	3706	185,300 Images 177,203 Image Objects 837,863 Tags	10s Objects: snapshot, purple 20s Objects: snapshot 30s Ojects: sky, day, tree, food 40s Objects: sky, tree, day, food, water 50s Objects: sky, tree, plant, food, water	43.00		0.37			CNN, Log-R, MLP, SVM	Conference	International Conference on User Modelling	B	Han, K., Jo, Y., Jeon, Y., Kim, B., Song, J., & Kim, S. W. (2018, July). Photos Don't Have Me, But How Do You Know Me?: Analyzing and Predicting Users on Instagram. In Adjunct Publication of the 26th Conference on User Modeling, Adaptation and Personalization (pp. 251-256). ACM.
Hu, J., Zeng, H. J., Li, H., Niu, C., & Chen, Z.	2007	Under 18, 18-24, 25-34, 35-49, Over 49	Webpages	Language Features	189480	223786	NR			00.34 Micro F1 (Teenage) 00.50 Micro F1 (Youngster) 00.49 Micro F1 (Young) 00.45 Micro F1 (Mid-Age) 00.34 Micro F1 (Elder) 00.46 Macro F1			SVM	Conference	International World Wide Web Conference	A/A1	Hu, J., Zeng, H. J., Li, H., Niu, C., & Chen, Z. (2007, May). Demographic prediction based on user's browsing behavior. In Proceedings of the 16th international conference on World Wide Web (pp. 151-160). ACM.
Ikeda, K., Hattori, G., Ono, C., Asoh, H., & Higashino, T.	2013	10s, 20s, 30s, 40+	Twitter	Tweets	100000		NR			00.43-00.76			SVM	Journal	Knowledge-Based Systems	Q1	Ikeda, K., Hattori, G., Ono, C., Asoh, H., & Higashino, T. (2013). Twitter user profiling based on text and community mining for market analysis. Knowledge-Based Systems, 51, 35-47.
Ito, J., Nishida, K., Hoshide, T., Toda, H., & Uchiyama, T.	2014	10-19, 20-29, 30-39, Over 40	Twitter, Blogs	Description, Location, No. Tweets, URL	65,873 (Blogs Dataset) 86,183 (TwiBlo Dataset)		NR	47.90-76.28					Log-R	Book	Online Social Media Analysis and Visualization	NR	Ito, J., Nishida, K., Hoshide, T., Toda, H., & Uchiyama, T. (2014). Demographic and Psychographic Estimation of Twitter Users Using Social Structures. In Online Social Media Analysis and Visualization (pp. 27-46). Springer International Publishing.
Ito, J., Hoshide, T., Toda, H., Uchiyama, T., & Nishida, K.	2013	10-19, 20-29, 30-39, Over 40	Twitter	Network Neighbours (Others the user has mentioned), Profile Data (e.g. No. Followers, Profile Documents), Tweeting Tendencies (e.g. No. Hashtags, URLs)	36,234 17,689	7,246,800 (Twiblo Dataset) 3,537,800 (Blogs Dataset)	NR	47.90-66.63					AIC, Log-R L2	Conference	International Conference on Advances in Social Network Analysis and Mining	B4	Ito, J., Hoshide, T., Toda, H., Uchiyama, T., & Nishida, K. (2013, August). What is he/she like?: Estimating twitter user attributes from contents and social neighbors. In Advances in Social Networks Analysis and Mining (ASONAM), 2013 IEEE/ACM International Conference on (pp. 1448-1450). IEEE.
Jones, R., Kumar, R., Pang, B., & Tomkins, A.	2007	13-17, 18-20, 21-24, 25-29, 30-24, 35-44, 45-54, 55-64, Over 65	Yahoo! Query logs, Yahoo! User Profiles	Query Logs	744000		Youth: apartments, baby, lyrics, mall, Myspace, pregnancy, quotes, soundtrack, torrent, wedding, wikipedia Older Age: aarp, amazon.com, funeral, lottery, mapquest, mediocre, newspapers, repair, retirement, senior, telephone						SVM	Conference	ACM International Conference on Information and Knowledge Management	A	Jones, R., Kumar, R., Pang, B., & Tomkins, A. (2007, November). I know what you did last summer: query logs and user privacy. In Proceedings of the ACM conference on Sixteenth Conference on information and knowledge management
Jurgens, D., Tsvetkov, Y., & Jurafsky, D.	2017	10-19, 30-39	Twitter	Language: Content, Styistic		38134	10-19: acronyms, more stylistic and grammatical variation, self-references, slang 30-39: less linguistic variation, speaker's maturity	71.20					RF	Conference	International Workshop on Social Informatics	B4	Jurgens, D., Tsvetkov, Y., & Jurafsky, D. (2017, September). Writer Profiling Without the Writer’s Text. In International Conference on Social Informatics (pp. 537-558). Springer, Cham.
Kabbur, S., Han, EH, & Karypis, G.	2010	3-12, 13-17, 18-34, 35-49, Over 50	Websites	Language: Content Web Page Structure	8215		web page textual content (T)						R	Conference	IEEE International Conference on Data Mining	A/A1	Kabbur, S., Han, EH, & Karypis, G. (2010, December). Content-based methods for web-site predicting demographic attributes. In Data Mining (ICDM), 2010 IEEE 10th International Conference on (pp. 863-868). IEEE.
Kelly, D., Smyth, B., & Caulfield, B.	2013	Under 28, Over 28	Smartphones	Location Data	29		NR	82.70					BN, DT, D-Table, SVM, NN, NB	Journal	IEEE Transactions on Human-Machine Systems	Q1/Q2	Kelly, D., Smyth, B., & Caulfield, B. (2013). Uncovering measurements of social and demographic behavior from smartphone location data. IEEE Transactions on Human-Machine Systems, 43(2), 188-198.
Kosinski, M., Stillwell, D., & Graepel, T.	2013	Continuous Variable	Facebook	Likes	52700		Young: Because I am a girl, Body by milk, Harperteen , J Bigga, Walt Disney Records Old: Coffee Party Movement, Cup of Joe for a Joe, Fixit and Forgetit, Small Business Saturday						Lin-R	Journal	PNAS	Q1	Kosinski, M., Stillwell, D., & Graepel, T. (2013). Private traits and attributes are predictable from digital records of human behavior. Proceedings of the National Academy of Sciences of the United States of America, 110(15), 5802–5. https://doi.org/10.1073/pnas.1218772110
Krismayer, T., Schedl, M., Knees, P., & Rabiser, R.	2017	6-17, 18-21, 22-25, 26-30, 31-40, 41-50, 51-60, 61-100	Last.fm	Listening Habits Profile Information	6698		NR						BLog-R, DMNB, NB, SLog-R, SVM	Conference	International Workshop on Content-Based Multimedia Indexing	B3	Krismayer, T., Schedl, M., Knees, P., & Rabiser, R. (2017, June). Prediction of User Demographics from Music Listening Habits. In Proceedings of the 15th International Workshop on Content-Based Multimedia Indexing (p. 8). ACM.
Kucukyilmaz, T., Cambazoglu, B. B., Aykanat, C., & Can, F.	2008	17 classes (NR)	Heaven BBS	Language: Character, Message Length, Punctuation Marks, Punctuation Usage, Smileys, Smiley Usage, Stopwords, Stopwords Usage, Word Length, Vocabulary Richness	1616	218742	Birth year e.g. 1978: demek (then), git (go), onemli (important) 1979: acar (opens), dusunuyon (thinking - misspelled), ucuza (cheaply)	19.90-75.40 (Birth Year)					KNN, NB, PRIM, SVM	Journal	Information Processing and Management	Q2	Kucukyilmaz, T., Cambazoglu, B. B., Aykanat, C., & Can, F. (2008). Chat mining: Predicting user and message attributes in computer-mediated communication. Information Processing & Management, 44(4), 1448-1466.
Likarish, P., Brdiczka, O., Yee, N., Ducheneaut, N., & Nelson, L.	2011	Continuous Variable	World of Warcraft	Character Features, Combined Features, Player Features, Progression Features	1040		1 perc_melee_dps – player, 2 duels_lost – character, 3 duel_won – character, 4 perc_bg_wins – character, 5 t_duels_wn – progression, 6 t_duels_lost – progression, 7 need_rolls – character, 8 perc_need – character, 9 respecs – character, 1- t-summons – progression - Age						SVM	Conference	Privacy Enhancing Technologies Symposium	NR	Likarish, P., Brdiczka, O., Yee, N., Ducheneaut, N., & Nelson, L. (2011). Demographic Profiling from MMOG Gameplay. HotPETs 2011: Hot Topics in Privacy Enhancing Technologies, 1–19. Retrieved from papers2://publication/uuid/ADFB1218-95B4-449E-AE02-FACC24A91913
Liu, J. Y., & Yang, Y. H.	2012	Under 24, Over 24	Last.fm	Content: Song/Artist Metadata, Song Signal Features Context: Temporal Patterns	992		Adolescent: Love Lockdown by Kanye West, Paranoid by Kanye West, Wings of words by chemistry Adult: Better Alone by Melanie C, Bright Lights by Matchbox Twenty, Downfall by Matchbox Twenty, Hung up by Madonna	45.70-71.10					SVM	Conference	ACM Multimedia	A	Liu, J. Y., & Yang, Y. H. (2012, November). Inferring personal traits from music listening history. In Proceedings of the second international ACM workshop on Music information retrieval with user-centered and multimodal strategies (pp. 31-36). ACM.
Liu, Y., Song, H. H., Bermudez, I., Mislove, A., Baldi, M., & Tongaonkar, A.	2015	NR	Smartphone Applications, Websites	Network Traffic Traces	1 (Lab Traffic Dataset) 13,000 (Real ISP Dataset)	9,227 HTTP Flows, 20,810 Tuples (Lab Traffic Dataset) 40,775,119 HTTP Flows, 51,368,712 Tuples (Real ISP Dataset)	NR						AO	Conference	Conference on Online Social Networks	NR	Liu, Y., Song, H. H., Bermudez, I., Mislove, A., Baldi, M., & Tongaonkar, A. (2015, November). Identifying personal information in internet traffic. In Proceedings of the 2015 ACM on Conference on Online Social Networks (pp. 59-70). ACM.
Malmi, E., & Weber, I.	2016	18-32, 33-100	Smartphones	Application Data	3760		18-22: Clash of Kings, GIPHY for messenger, GroupMe, Perk word search, iFunny :), Snapchat, Summoners War, Vine 33-100: BINGO Blitz, DoubleUCasino, Email, Field Agent, Great clips online check-in, iHeartRadio, Lookout security & antivirus, New words with friends	77.10	00.85 00.85 (Goel et al. 2012 Data)				Log-R	Conference	ICWSM	B1	Malmi, E., & Weber, I. (2016, February). You Are What Apps You Use: Demographic Prediction Based on User's Apps. In ICWSM (pp. 635-638).
Mo, K., Tan, B., Zhong, E., & Yang, Q.	2012	Continuous Variable	Smartphones	Acceleration, Applications, Bluetooth, Calendar, Call Logs, Contacts, GSM, Media, Media Play, Process, Distance, System, Wireless LAN, Visit	80		Brands of bluetooth devices used, Brands of devices used at work, Brands of wireless LAN devices used						GP, SVM, SVMR	Conference	International Conference on Pervasive Computing	A/A2	Mo K, Tan B, Zhong E, Yang Q. Report of Task 3 : Your Phone Understands You. Mob Data Chall Work. 2012;
Nadeem, S. M. S. J. T., & Weigle, M. C.	2012	16-21, 22-27, 28-32, 33-38, 39-44, Over 45	Smartphones	Acceleration, Application, Bluetooth, Calendar, Call Log, GSM, Media, Media Play, System, Wireless LAN	80		NR	41.00-50.00					BAG, SVM	Journal	GeroScience	NR	Nadeem, S. M. S. J. T., & Weigle, M. C. (2012). Demographic prediction of mobile user from phone usage. Age, 1, 16-21.
Moseley, N., Alm, C. O., & Rege, M.	2014	Under 30, Over 30	Twitter	Language: Contraction, Drop Last Character, Drop Vowels, Repeat Letter, Single Character, Th to D, Word Begin, Word End, You to U	66	101496	NR	70.00-83.00					J48, MLP, NB, OneR, SVM	Conference	International Conference on Research Challenges in Information Science	B/B4	Moseley, N., Alm, C. O., & Rege, M. (2014, August). Toward inferring the age of Twitter users with their use of nonstandard abbreviations and lexicon. In Information Reuse and Integration (IRI), 2014 IEEE 15th International Conference on (pp. 219-226). IEEE.
Murray, D., & Durrell, K.	2000	Under 18, 18-34, 35-54, Over 55	Web usage data	NR	83196		NR						LSA	Conference	Web Usage Analysis and User Profiling	B/C	Murray, D., & Durrell, K. (2000). Inferring demographic attributes of anonymous Internet users. In Web Usage Analysis and User Profiling (pp. 7-20). Springer Berlin Heidelberg.
Nguyen, D., Smith, N. A., & Rosé, C. P.	2011	Younger: 15-25, Older: 35-60	Blogs, Breast Cancer Forums, Telephone Conversations	Language: Part-of Speech Bigrams, Part-of-Speech Unigrams, LIWC Features, Unigrams	19,320 Blogs 11,914 (Fisher Dataset) 3,874 (Cancer Dataset)		Global - like, gender-male, LIWC-school, just, LIWC - anger, LIWC - cause, mom, so, definitely, LIWC-Negemo. Blogs - you, went, fun, school, but, LIWC-Comma, goPOS-vbp nn, that’s, well. Fisher - actually, mean, everyone, definitely, mom, student, pretty, POS-lrb cd, LIWC-Swear, huge. Cancer - LIWC-Emotic. young, history, mom, ultrasound, kids, age, mum, POS-sym rrb, discharge - All features for y…						LR	Conference	Association of Computational Linguistics	A	Nguyen, D., Smith, N. A., & Rosé, C. P. (2011, June). Author age prediction from text using linear regression. In Proceedings of the 5th ACL-HLT Workshop on Language Technology for Cultural Heritage, Social Sciences, and Humanities (pp. 115-123). Association for Computational Linguistics.
Nguyen, D., Gravel, R., Trieschnigg, D., & Meder, T.	2013	Under 20, 20-40, Over 40	Twitter	Language: Content, Sylistic	3110	622000	Young (Dutch): :), als, ben, haha, ik, oke, stages, werkgroep, xd Old (English): beautiful, damn, daughter, enjoy, evaluate, good morning, son, take care, thanks, wish Young (English): :), am, haha, I, if, internships, okay, school, work group, xd Old (Dutch): dank, dochter, evalueren, geniet, goedemorgen, mooie, sterkte, verdomd, wens, zoon			00.63-0.78 Macro F1 00.80-0.88 Micro F1 00.61-00.70 Macro F1 Life Stages 00.83-00.88 Micro F1 Life Stages	00.93 Precision (Under 20) 00.67 Precision (20-40) 00.82 Precision (Over 40) 00.88 Precision (Secondary School Student) 00.67 Precision (College Student) 00.85 Precision (Employee)	00.98 Recall (Under 20) 00.76 Recall (20-40) 00.45 Recall (Over 40) 00.99 Recall (Secondary School Student) 00.13 Recall (College Student) 00.90 Recall (Employee)	Log-R, Lin-R	Conference	ICWSM	B1	Nguyen, D., Gravel, R., Trieschnigg, D., & Meder, T. (2013). “How old do you think I am ?”: A study of language and age in Twitter. Proceedings of the Seventh International AAAI Conference on Weblogs and Social Media, 8-11 July 2013, Cambridge, Massachusetts, USA, 439–448.
Nguyen, D., Gravel, R., Trieschnigg, D., Meder, T., & Yeung, C. M. A.	2013	Under 20, 20-40, Over 40, Continuous Variable	Twitter	Unigrams	3000		Young (Dutch): :), ben (am), haha, ik (I), oke, (okay), school, stages (internships), werkgroep (work group), xd Old (Dutch): dank (thanks), dochter (daughter), geniet (enjoy), mooie (beautiful), verdomd (damn), wens (wish), zoon(son)			0.86			Log-R, Lin-R	Conference	ACM Conference on Hypertext and Hypermedia	A/A2	Nguyen, D., Gravel, R., Trieschnigg, D., Meder, T., & Yeung, C. M. A. (2013). TweetGenie: automatic age prediction from tweets. ACM SIGWEB Newsletter, 4(4).
Oktay, H., Firat, A., & Ertem, Z.	2014	Under 18, 18-29, 30-49, 50-65, Over 65	Twitter	First Names		178143	NR						B	Technical Report	Technical Report	NR	Oktay, H., Firat, A., & Ertem, Z. (2014). Demographic breakdown of Twitter users: An analysis based on names. Academy of Science and Engineering (ASE) .
Park, S. H., Lee, H. J., Han, S. P., & Lee, D. H.	2009	Continuous Variable	Smartphone	Profile Information (From Network Neighbours)	117333		get	22.30-94.40		00.62-00.86			AO	Conference	WAINA	NR	Park, S. H., Lee, H. J., Han, S. P., & Lee, D. H. (2009). User age profile assessment using SMS network neighbors’ age profiles. In Proceedings - International Conference on Advanced Information Networking and Applications, AINA (pp. 960–965). https://doi.org/10.1109/WAINA.2009.136
Peersman, C., Daelemans, W., & Van Vaerenbergh, L.	2011	Age (Under 16 vs. Over 16, Under 16 vs. Over 18, Under 16 vs. Over 25, Under 16 Male vs. Under 16 Female vs. Over 25 Male vs. Over 25 Female)	Netlog	Language: Bigrams, Character Bigrams, Character Trigrams, Character Tetragrams, Trigrams, Unigrams	1537283		NR	65.50-88.80		00.66-00.92			SVM	Conference	International Conference on Information and Knowledge Management	A1	Peersman, C., Daelemans, W., & Van Vaerenbergh, L. (2011). Predicting age and gender in online social networks. International Conference on Information and Knowledge Management, Proceedings, 37–44. https://doi.org/10.1145/2065023.2065035
Perozzi, B., & Skiena, S.	2015	Continuous Variable	Pokec (Solvakian Social Network)	Network Data	1138314		NR						Lin-R	Conference	International Conference of the World Wide Web	A/A1	Perozzi, B., & Skiena, S. (2015, May). Exact age prediction in social networks. In Proceedings of the 24th International Conference on World Wide Web (pp. 91-92). ACM.
Pham, D. D., Tran, G. B., & Pham, S. B.	2009	Under 22, 23-26, Over 27	Blogs (Vietnamese)	Language: Character, Content, Function Words, Lexicon, Line, Paragraph, Part-of-Speech, Structural, Word	73	3524	NR	45.80-77.27					BAG, BN, J48, ILB), NB, MP, RF, RT, SMO	Conference	International Conference on Asian Language Processing	NR	Pham, D. D., Tran, G. B., & Pham, S. B. (2009, December). Author profiling for Vietnamese blogs. In Asian Language Processing, 2009. IALP'09. International Conference on (pp. 190-194). IEEE.
Preotiuc-Pietro, D., Xu, W., & Ungar, L. H.	2016	Under 25, Over 30	Twitter	Paraphrases	5091	690077	NR		00.74-00.90				NB	Conference	Conference on Artificial Intelligence	A/A1	Preotiuc-Pietro, D., Xu, W., & Ungar, L. H. (2016, February). Discovering User Attribute Stylistic Differences via Paraphrasing. In AAAI (pp. 3030-3037).
Qin, Z., Wang, Y., Xia, Y., Cheng, H., Zhou, Y., Sheng, Z., & Leung, V. C.	2014	Under 18 (Teenage), 18-24 (Youngster), 25-44 (Young), 45-59 (Young), Over 59 (Elder)	Smartphones	Call Log Data	25		NR	54.89-66.42		50.95-64.39 Macro F1 40.33-66.4 Micro F1 (Teenage) 50.52-63.36 Micro F1 (Youngster) 44.8-65.03 Micro F1 (Young) 64.29-74.26 Micro F1 (Mid-age) 49.77-54.67 Micro F1 (Elder)			DT, Log-R, NB	Conference	International Conference on Smart Computing	NR	Qin, Z., Wang, Y., Xia, Y., Cheng, H., Zhou, Y., Sheng, Z., & Leung, V. C. (2014, November). Demographic information prediction based on smartphone application usage. In Smart Computing (SMARTCOMP), 2014 International Conference on (pp. 183-190). IEEE.
Rangel, F.	2013	13-17, 23-27, 33-47	Twitter	Language: Stylistic	10,228 10s (English) 51,276 20s (English) 80,044 30s (English) 1,514 10s (Spanish) 25,524 20s (Spanish) 18,392 30s (Spanish)		NR	2.78-59.47 (English) 8.41-62.72 (Spanish)					SVM	Conference	BCS IRSG Symposium: Future Directions in Information Access 2007	NR	Rangel, F. (2013). Author profile in social media: Identifying information about gender, age, emotions and beyond. In Proceedings of the 5th BCS IRSG Symposium on Future Directions in Information Access (pp. 58-60).
Rangel, F., & Rosso, P.	2013	13-17, 23-27, 33-47	Blogs	Frequencies: Emoticons, No. Capital Letters, No. Words With Flooded Characters (e.g. Heeeeelloooooo), Part-of-Speech, Puncutation marks, Ratio - No. Unique Words/Total No. Words, Spanish Emotion Lexicon, Words Completely In Capital Letters, Word Length, Words Starting With A Capital Letter	82700		NR	63.50					SVM	Conference	International Workshop on Natural Language Processing and Cognitive Science	B4	Rangel, F., & Rosso, P. (2013). Use of language and author profiling: Identification of gender and age. Natural Language Processing and Cognitive Science, 177.
Rangel, F., Rosso, P., Koppel, M., Stamatatos, E., & Inches, G.	2013	10s (13-17), 20s (23-27), 30s (33-47)	Blogs, Chat Logs	Language: Stylistic (e.g. Capital letters, Emoticons, HTML-based Features, Image URLs or Links, Part-of-Speech Tags, Punctuation Marks, Quotations, Readability) Content (e.g. bag of words, contractions, dictionary based words, emotion words, entropy based words, LSA, sentiment words, slang, TF-IDF, topic based words, character flooding	283,240 (English) 90,860 (Spanish)		NR	2.78-65.72 (English Dataset) 5.12-65.58 (Spanish Dataset)					DT, Log-R, ME, NB, SGD, RF, SVM	Conference	CLEF	B2	Rangel, F., Rosso, P., Koppel, M., Stamatatos, E., & Inches, G. (2013). Overview of the author profiling task at PAN 2013. Notebook Papers of CLEF, 23-26.
Rangel, F., Rosso, P., Chugur, I., Potthast, M., Trenkmann, M., Stein, B., ... & Daelemans, W.	2014	18-24, 25-34, 35-49, 50-65, Over 65	Blogs, Hotel Reviews (Trip Advisor), Social Media, Twitter	Language: Stylistic (Capital Letters, Capital Words, Cleanliness, Correctness, Diversity of Texts, Features Employed in Information Retrieval (IR) (e.g. Cosine Similarity, or Okapi BM25), Documents, HTML Information, Lexical Features, No. Posts Per User, Profiles and Subprofiles, Readability, Relationships Among Terms, Sentiment)	249 Blogs (English) 50,119 Hotel Reviews (English) 11,814 Social Media (English) 490 Twitter (English) 158 Blogs (Spanish) 1,960 Users (Social Media - Spanish Dataset) 294 Users (Twitter - Spanish Dataset)		NR	25.29-37.28 Social Media (English Dataset) 21.91-48.94 Social Media (Spanish) 16.67-46.15 Blogs (English) 25.00-48.21 Blogs (Spanish) 11.04-63.33% (English Dataset) 22.22-69.23% (Spanish Dataset) 9.01-37.20% Hotel Reviews (English Dataset)					AO, DT, LR, LB, RTF, MC, MP, SL, NB, RF, SVM	Conference	CLEF	B2	Rangel, F., Rosso, P., Chugur, I., Potthast, M., Trenkmann, M., Stein, B., ... & Daelemans, W. (2014). Overview of the 2nd author profiling task at pan 2014. In CLEF 2014 Evaluation Labs and Workshop Working Notes Papers, Sheffield, UK, 2014 (pp. 1-30).
Rangel, F., & Rosso, P.	2015	18-24, 25-34, 35-49, 50-65, Over 65	Blogs Hotel Reviews Social Media Twitter	EmoGraph With Character 6-grams	3,376 Social media (English) 566 Social media (Spanish) 74 Blogs (English) 54 Blogs (Spanish) 154 Twitter (Engligh) 90 Twitter (Spanish) 821 Hotel review (English)		NR	46.20 Blogs (English) 46.40 Blogs (Spanish) 45.50 Twitter (English) 58.90 Twitter (Spanish) 34.20% (English Social Media) 45.90% (Spanish Social Media) 30.80% (English Reviews)					AB, SL, SVM	Conference	Cross Language Evaluation Forum Workshop	B2	Rangel, F., & Rosso, P. (2015, September). On the multilingual and genre robustness of emographs for author profiling in social media. In International Conference of the Cross-Language Evaluation Forum for European Languages (pp. 274-280). Springer, Cham.
Rangel Pardo, F. M., Celli, F., Rosso, P., Potthast, M., Stein, B., & Daelemans, W.	2015	18-24, 25-34, 35-49, Over 50	Twitter	Language: Stylistic (Capital Letters, Capital Words, Cleanliness, Correctness, Diversity of Texts, Features Employed in Information Retrieval (IR) (e.g. Cosine Similarity, or Okapi BM25), Documents, HTML Information, Lexical Features, No. Posts Per User, Profiles and Subprofiles, Readability, Relationships Among Terms, Sentiment)	336 (English) 228 (Spanish) 86 (Italian) 76 (Dutch)		NR	40.85-83.80 (English) 36.36-79.55 (Spanish)					SVM, DT, RF J48, RTF, BAG, LDA, Lin-R, Log-R, RR	Conference	CLEF	B2	Rangel Pardo, F. M., Celli, F., Rosso, P., Potthast, M., Stein, B., & Daelemans, W. (2015). Overview of the 3rd Author Profiling Task at PAN 2015. In CLEF 2015 Evaluation Labs and Workshop Working Notes Papers (pp. 1-8).
Rangel, F., & Rosso, P.	2016	18-24, 25-34, 35-49, 50-64, Over 65	Twitter, Social Media, Blogs, Essays, Reviews	Language: Stylistic (e.g. Slang, Capital Letters, Unique Words, Ngram Models, Parts-of-Speech, Collocations, LDA, Readability Indexes, Vocabulary Richness, Correctness, Verbosity, TF-IDF, Distributed Representaitons)	428 Twitter (English) 250 Twitter (Spanish) 384 Twitter (Dutch) 348 Social Media (English) 64 Social Media (Spanish) 78 Blogs (English) 56 Blogs (Spanish) 550 Reviews (Dutch)		NR	32.05-58.97 (English) 21.43-51.79 (Spanish)					RF, J48 LADT, Log-R, SVM, RBM	Conference	CLEF	B2	Rangel, F., & Rosso, P. (2016). On the impact of emotions on author profiling. Information processing & management, 52(1), 73-92.
Rangel, F., Rosso, P., Verhoeven, B., Daelemans, W., Potthast, M., & Stein, B.	2016	13-17, 23-27, 33-47	Blogs	EmoGraph (Emotion Labelled Graph Based Features) Language: Emoticons, Frequencies, Morphosyntactic, Punctuation Marks, Semantic Classification of Verbs, Spanish Emotion Lexicon	84,060 (Spanish)		10s Females: animals, astronomy, buildings, chemistry, color, linguistics, music, planning, play, psychiatry, sexuality 10s Males: administration, buildings, card, commerse, literature, military, number, physics, play, tourism 20s Females: fashion, food, geography, industry, medicine, metrology, money, number, physics, planning, town 20s Males: animals, art, astronomy, gastronomy, metrology, musi…	61.62-66.24					SVM	Journal	Information Processing and Management	Q2	Rangel, F., Rosso, P., Verhoeven, B., Daelemans, W., Potthast, M., & Stein, B. (2016). Overview of the 4th author profiling task at PAN 2016: cross-genre evaluations. Working Notes Papers of the CLEF.
Rao, D., & Yarowsky, D.	2010	Under 30, Over 30	Twitter	Sociolinguistic Features (e.g. Ellipses, Excitement, Ngrams, OMG, Smileys)	84,060 (Spanish)		NR	69.44-74.11					SVM	Conference	Conference on Neural Information Processing Systems	A1	Rao, D., & Yarowsky, D. (2010). Detecting latent user properties in social media. In In Proc. of the NIPS MLSN Workshop.
Rao, D., Yarowsky, D., Shreevats, A., & Gupta, M.	2010	Under 30, Over 30	Twitter	Sociolinguistic Features (e.g. Ellipses, Excitement, Ngrams, OMG, Smileys)	2000	2376631	Under 30 (my_rents, my_sorors, my_yuppie, my_zunehd) Over 30 (my_daughters, my_epidural, my_grandkids, my_work, my_zzzz)	69.44-74.11					SVM	Conference	ACM International Conference on Information and Knowledge Management	A/A1	Rao, D., Yarowsky, D., Shreevats, A., & Gupta, M. (2010, October). Classifying latent user attributes in twitter. In Proceedings of the 2nd international workshop on Search and mining user-generated contents (pp. 37-44). ACM.
Rosenthal, S., & McKeown, K.	2011	18-22, 28-32, 38-42	LiveJournal	Language: Content (BOW, Interests), Stylistic (Lexical-stylistic)		245000	18-22: anything, because, him, ldquot ('), maybe, t, school, x 28-32: because, find, great, him, many, post, week, years 38-42: because, him, house, may, old, world, please	53.47-94.50					Log-R, SVM	Conference	Annual Meeting of the Association for Computational Linguistics	A	Rosenthal, S., & McKeown, K. (2011). Age prediction in blogs: A study of style, content, and online behavior in pre-and post-social media generations. Proceedings of the 49th Annual Meeting of the Association for Computational Linguistics: Human Language Technologies-Volume 1, 763–772.
Roy, A., & Pebesma, E.	2017	Under 22, 23-26, 27-28, 29-31, 32-38, Over 39 (Male) Under 23, 24-26, 27-28, 29-32, 33-42, Over 43 (Female)	Smartphone	Geohashes	60865	3252950	NR	96.75					DT, DA, FPG, LDA	Conference	International Workshop on Social Sensing	NR	Roy, A., & Pebesma, E. (2017, April). A Machine Learning Approach to Demographic Prediction using Geohashes. In Proceedings of the 2nd International Workshop on Social Sensing (pp. 15-20). ACM.
Rustagi, M., Prasath, R. R., Goswami, S., & Sarkar, S.	2009	10-19, 20-29, 30-39, Over 40	blogger.com	Ave. Length of Sentences, Slang Words		92381	NR	92.51-95.00					NB	Conference	International Conference on Pattern Recognition and Machine Intelligence	NR	Rustagi, M., Prasath, R. R., Goswami, S., & Sarkar, S. (2009, December). Learning age and gender of blogger from stylistic variation. In International Conference on Pattern Recognition and Machine Intelligence (pp. 205-212). Springer Berlin Heidelberg.
Sap, M., Park, G., Eichstaedt, J. C., Kern, M. L., Stillwell, D., Kosinski, M., … Schwartz, H. A.	2014	Age (12 4-year age bins starting at 13, ending at 60)	Facebook	Words and Weights (mypersonality Dataset)	75394	300000000	NR						ENR, SVM, LASSO	Conference	Conference on Empirical Methods in Natural Language Processing	A/A1	Sap, M., Park, G., Eichstaedt, J. C., Kern, M. L., Stillwell, D., Kosinski, M., … Schwartz, H. A. (2014). Developing Age and Gender Predictive Lexica over Social Media. Empirical Methods in Natural Language Processing (EMNLP), 1146–1151. https://doi.org/10.1109/IRI.2014.7051893
Sarraute, C., Blanc, P., & Burroni, J.	2014	10-25, 25-35, 35-50, Over 50	Smartphone	Call Log Data/SMS Data: Degree of Social Network, Duration of Calls, In/Out Degree Social Network, No. Calls, No. Contact Days, No. SMS	90000000		NR			00.37-00.62			SVM, Lin-DA, Log-R, NB, QDA	Conference	International Conference on Advances in Social Network Analysis and Mining	B4	Sarraute, C., Blanc, P., & Burroni, J. (2014, August). A study of age and gender seen through mobile phone usage patterns in mexico. In Advances in Social Networks Analysis and Mining (ASONAM), 2014 IEEE/ACM International Conference on (pp. 836-843). IEEE.
Sarraute, C., Brea, J., Burroni, J., & Blanc, P.	2015	Under 25, 25-34, 35-49, Over 50	Smartphone	Call Log Data/SMS Data: Degree of Social Network, Duration of Calls, In/Out Degree Social Network, No. Calls, No. Contact Days, No. SMS	500000		NR	36.90-62.30					SVM, Log-R, NB	Journal	Social Network Analysis and Mining	Q2	Sarraute, C., Brea, J., Burroni, J., & Blanc, P. (2015). Inference of demographic attributes based on mobile phone usage patterns and social network topology. Social Network Analysis and Mining, 5(1), 1-18.
Schler, J., Koppel, M., Argamon, S., & Pennebaker, J. W.	2006	13--17, 18-22, 23-27, 28-32, 33-37, 38-42, 43-48, Over 48, Unknown	Blogs: blogger.com	Language: Content, Style	37478		10s: awesome, bored, boring, crappy, dumb, homework, mad, maths, mum, sis 20s: album, apartment, bar, beer, drunk, dating, semester, student 30s = marriage, development, campaign, tax, local, democratic, son, systems, provide, workers. Male = money, job, sports, tv. Female = sleep, eating, sex, family, friends, positive emotions, negaive emotions. 10s = sports, sleep, sex, friends, positive emoti…	76.20					W	Conference	AAAI Spring Symposium	NR	Schler, J., Koppel, M., Argamon, S., & Pennebaker, J. W. (2006, March). Effects of Age and Gender on Blogging. In AAAI spring symposium: Computational approaches to analyzing weblogs (Vol. 6, pp. 199-205).
Schwartz, H. A., Eichstaedt, J. C., Kern, M. L., Dziurzynski, L., Ramones, S. M., Agrawal, M., … Ungar, L. H.	2013	Continuous Variable	Facebook	Language: Phrases, Topic Instances (Facebook Messages), Words	74859	700000000	13-18: ;D, boyfriend, english, haha, homework, lol, prom, you, school, tomorrow 19-22: 21st, chill, classes, dont, drunk, exam, papers, shit, wanna 23-29: apartment, at_work, beer, company, drinks, enjoying, home, hubby, office, work 30-65: children, country, daughter, family, freedom, great, my_kids, prayer	78.40-91.90					RR	Journal	Plos One	Q1	Schwartz, H. A., Eichstaedt, J. C., Kern, M. L., Dziurzynski, L., Ramones, S. M., Agrawal, M., … Ungar, L. H. (2013). Personality, Gender, and Age in the Language of Social Media: The Open-Vocabulary Approach. PLoS ONE, 8(9). https://doi.org/10.1371/journal.pone.0073791
Sloan, L., Morgan, J., Burnap, P., & Williams, M.	2015	13-20, 21-30, 31-40, 41-50, 51-60, Over 60	Twitter	Meta-data	32032		NR						NR	Journal	Plos One	Q1	Sloan, L., Morgan, J., Burnap, P., & Williams, M. (2015). Who tweets? Deriving the demographic characteristics of age, occupation and social class from Twitter user meta-data. PloS one, 10(3), e0115545.
Sloan, L., & Morgan, J.	2015	Continuous Variable	Twitter	Tweets	30,030,446 (Dataset 1) 23,789,264 (Dataset 2)		NR						NR	Journal	Plos One	Q1	Sloan, L., & Morgan, J. (2015). Who tweets with their location? Understanding the relationship between demographic characteristics and the use of geoservices and geotagging on Twitter. PloS one, 10(11), e0142209.
Sloan, L.	2017	Continuous Variable	Twitter	Tweets	4328		NR						NR	Journal	Social Media and Society	Q1	Sloan, L. (2017). Who tweets in the United Kingdom? Profiling the Twitter population using the British social attitudes survey 2015. Social Media+ Society, 3(1), 2056305117698981.
Solomon, A., Bar, A., Yanai, C., Shapira, B., & Rokach, L.	2018	Under 29, Over 29 (Sherlock Dataset) Under 26, Over 26 (CARS Dataset)	Smartphones	GPS Sensor Data	45 (Sherlock Dataset) 81 (CARS Dataset)	6,219,330 (Sherlock Dataset) 185,032 (CARS Dataset)	NR	55.56-80.00 (Sherlock Dataset) 71.60-75.30 (CARS Dataset)					Log-R, NB. DT, SVM, RF	Conference	Conference on User Modelling, Adaptation and Personalization	B1	Solomon, A., Bar, A., Yanai, C., Shapira, B., & Rokach, L. (2018, July). Predict Demographic Information Using Word2vec on Spatial Trajectories. In Proceedings of the 26th Conference on User Modeling, Adaptation and Personalization(pp. 331-339). ACM.
Tam, J., & Martell, C. H.	2009	13-19, 20-29, 30-39, 40-49, 50-59 20-59	Chat Data	Language: Bigrams, Character Trigrams, Character 4-grams, Character 5-grams, Unigrams, Word Meta-data Features (Ave No. Capitals Per Post, Ave No. Emoticon Types Per Post, Ave. Post Length, Ave. No. Tokens Per Post, Ave. Word Types Per Doc)	2161	160740	NR			00.44-1.00			NB, SVM	Conference	IEEE International Conference on Semantic Computing	B2	Tam, J., & Martell, C. H. (2009, September). Age detection in chat. In Semantic Computing, 2009. ICSC'09. IEEE International Conference on (pp. 33-39). IEEE.
Ulges, A., Koch, M., & Borth, D.	2012	13-17, 18-24, 25-34, 35-44, 45-54, 55-64, 65-74, Over 75	YouTube	Content, Colour, Visual Words		14000	baby, cake, counterstrike-game, horse, riding				0.41		SVM	Conference	ACM International Conference on Multimedia Retrieval	A2/B	Ulges, A., Koch, M., & Borth, D. (2012, June). Linking visual concept detection with viewer demographics. In Proceedings of the 2nd ACM International Conference on Multimedia Retrieval (p. 24). ACM.
van de Loo, J., De Pauw, G., & Daelemans, W.	2016	Under, 16, Over 16, Under 18, Over 18, Under 22, Over 22, Under 28, Over 28	Netlog	Language: Bigrams, Tetragrams, Trigrams, Unigrams		379769	NR	74.70-76.70					SVM	Journal	International Journal of Cyber-Security and Digital Forensics	NR	van de Loo, J., De Pauw, G., & Daelemans, W. (2016). Text-based age and gender prediction for online safety monitoring. International Journal of Cyber-Security and Digital Forensics (IJCSDF), 5(1), 46-60.
Vijayaraghavan, P., Vosoughi, S., & Roy, D.	2017	Under 30, 30-60, Over 60	Twitter	Profile Description, Followers, Name, Picture, Tweets		6580	NR			00.72-00.82 Macro F1			DMMMT, RF, SVM	Conference	Annual Meeting of the Association for Computational Linguistics	A1	Vijayaraghavan, P., Vosoughi, S., & Roy, D. (2017). Twitter Demographic Classification Using Deep Multi-modal Multi-task Learning. In Proceedings of the 55th Annual Meeting of the Association for Computational Linguistics (Volume 2: Short Papers) (Vol. 2, pp. 478-483).
Volkova, S., & Bachrach, Y.	2015	Under 25, Over 25	Twitter	Language: Lexical, Lexicon, Negation, Postags, Stylistic	123513	24919528	NR		0.66				Log-R	Journal	Cyberpsychology, Behaviour and Social Networking	Q1	Volkova, S., & Bachrach, Y. (2015). On Predicting Sociodemographic Traits and Emotions from Communications in Social Networks and Their Implications to Online Self-Disclosure. Cyberpsychology, Behavior and Social Networking, 18(12), 726–36. https://doi.org/10.1089/cyber.2014.0609
Volkova, S., Bachrach, Y., & Van Durme, B.	2016	Under 25, Over 25	Twitter	Content Featues (From tweets), Context Features (Learned from user interests)	4129	825800	NR		00.61-00.66				Log-R	Conference	IEEE Second International Conference on Big Data Computing Service and Applications	NR	Volkova, S., Bachrach, Y., & Van Durme, B. (2016, March). Mining user interests to predict perceived psycho-demographic traits on Twitter. In Big Data Computing Service and Applications (BigDataService), 2016 IEEE Second International Conference on (pp. 36-43). IEEE.
Weren, E. R., Kauer, A. U., Mizusaki, L., Moreira, V. P., de Oliveira, J. P. M., & Wives, L. K.	2014	10-19, 20-29, 30-39	Blogs	Information Retrieval Features Language: Correctness, No. Characters, No. Sentences, No. Words, Sentiment, Style Readability tests: Flesch-Kincaid		236000	10s: href, okai_sum 20: cosine_count, cosine_sum, okapi_count 30s: cosine_count, cosine_sum, okapi_count, okapi_sum	57.20-68.30		00.51-00.67			B, BAG, DT, J48, KNN, NN, R, SVM	Journal	Journal of Information and Data Management	NR	Weren, E. R., Kauer, A. U., Mizusaki, L., Moreira, V. P., de Oliveira, J. P. M., & Wives, L. K. (2014). Examining multiple features for author profiling. Journal of information and data management, 5(3), 266.
Wu, M. J., Jang, J. S. R., & Lu, C. H.	2014	Continuous Variable	Last.fm	Music Meta-data: Artist Name, Song Title, Tracks Most Frequently Listened To	145210		NR						GMM, GSV, LSI, UMB, SVM, SVR	Conference	International Conference on Music Information Retrieval	A1	Wu, M. J., Jang, J. S. R., & Lu, C. H. (2014). Gender Identification and Age Estimation of Users Based on Music Metadata. In ISMIR (pp. 555-560).
Ying, J. J., Chang, Y., Huang, C., & Tseng, V. S.	2012	Continuous Variable	Smartphones	Behavioural Features, Environment Features	80		NR	50.83-77.77					ASC, D-Table, J48, M5P, R, RS	Conference	International Conference on Pervasive Computing	A/A2	Ying, J. J., Chang, Y., Huang, C., & Tseng, V. S. (2012). Demographic Prediction Based on User ’ s Mobile Behaviors. Nokia, 2012(1), 1–6.
Zheng, L., Yang, K., Yu, Y., & Jin, P.	2013	0-18, 18-24, 24-35, Over 35	Sina Weibo	Content Language: Content of Tags, Education, Job, Self-description Numeric Features: No. Microblogs, No. Words in Job, No. Words in Tag	1120000		get				00.68-00.71		NR	Journal	International Journal of Database Theory and Application	Q4	Zheng, L., Yang, K., Yu, Y., & Jin, P. (2013). Predicting Age Range of Users over Microblog Dataset. International Journal of Database Theory and Application, 6(6), 85-94.
Zhong, E., Tan, B., Mo, K., & Yang, Q.	2013	16-21, 22-27, 29-32, 33-38, 39-44, Over 45	Smartphones	Acceleration, Application Useage, Bluetooth, Calendar, Call Logs, Contacts, GSM, Media, Media Play, Process, Distance, System, Wireless LAN, Visit	80		Brands of Bluetooth devices used, No. places visited at 0.00am, 4th most visited places at 0.00am.						GP, SVM, SVMR	Journal	Pervasive and Mobile Computing	Q1	Zhong, E., Tan, B., Mo, K., & Yang, Q. (2013). User demographics prediction based on mobile data. Pervasive and Mobile Computing, 9(6), 823-837.
Zhong, Y., Yuan, N. J., Zhong, W., Zhang, F., & Xie, X.	2015	Continuous Variable	Sina Weibo	Check-ins	3354918	81781544	NR						Lin-R, PR, BTR	Conference	International Conference on Web Search and Data Mining	B	Zhong, Y., Yuan, N. J., Zhong, W., Zhang, F., & Xie, X. (2015, February). You are where you go: Inferring demographic attributes from location check-ins. In Proceedings of the eighth ACM international conference on web search and data mining(pp. 295-304). ACM.
