# Supplementary material for: What demographic attributes do our digital footprints reveal? A systematic review
Source: PLoS One. 2018 Nov 28;13(11):e0207112. doi: 10.1371/journal.pone.0207112 (PMC6261568; doi:10.1371/journal.pone.0207112)
Supplement: S4 Table — (XLSX) [file pone.0207112.s004.xlsx]

## Sheet: Location
Authors	Year	Classes	Platform	Predictors/Features	No. Users	No. Digital Traces	Top Predictors	Accuracy %	AUC	F-score	Precision	Recall	Classifiers/Methods Used	Article Type	Conference/Journal Title	Quality	Reference
Backstrom, L., Sun, E., & Marlow, C.	2010	Location	Facebook	Address Data, Network Associations	2900000		NR	In graph					MLE	Conference	International Conference of the World Wide Web	A/A1	Backstrom, L., Sun, E., & Marlow, C. (2010, April). Find me if you can: improving geographical prediction with social and spatial proximity. In Proceedings of the 19th international conference on World wide web (pp. 61-70). ACM.
Bergsma, S., Dredze, M., Van Durme, B., Wilson, T., & Yarowsky, D.	2013	Country (Geolocation - 53 countries), Origin of a name (Indian, Non-Indian)	Twitter	First Names, Last Names, Profile Location Field	802000		NR	80.20-86.70 75.60- 88.00 Origin of name					SVM	Conference	North American Association for Computational Linguistics	A/A1	Bergsma, S., Dredze, M., Van Durme, B., Wilson, T., & Yarowsky, D. (2013). Broadly Improving User Classification via Communication-Based Name and Location Clustering on Twitter. Hlt-Naacl, (June), 1010–1019.
Chaabane, A., Acs, G., & Kaafar, M. A.	2012	Country (That they are currently in)	Facebook	Interests	104,401 (PubProfiles Dataset) 494,392 (Raw Profiles Dataset) 4,012 (Volunteer Profiles Dataset)		NR	60.00 (PubProfiles Dataset)					LDA	Conference	Usenix Networked and Distributed System Security Symposium	A/A1	Chaabane, A., Acs, G., & Kaafar, M. A. (2012, February). You are what you like! information leakage through users’ interests. In Proceedings of the 19th Annual Network & Distributed System Security Symposium (NDSS).
Chandra, S., Khan, L., & Muhaya, F. B.	2011	Location (City level)	Twitter	Tweets, Reply-tweet Messages	11124	1,100,00	NR	In graph					AO	Conference	International Conference on Privacy, Security, Risk, and Trust	NR	Chandra, S., Khan, L., & Muhaya, F. B. (2011, October). Estimating twitter user location using social interactions--a content based approach. In Privacy, Security, Risk and Trust (PASSAT) and 2011 IEEE Third Inernational Conference on Social Computing (SocialCom), 2011 IEEE Third International Conference on (pp. 838-843). IEEE.
Chang, H. W., Lee, D., Eltaher, M., & Lee, J.	2012	Home Location	Twitter	Tweet Content	135808	4125960	la, nyc, hiring, dallas, francisco, obama, fashion, atlanta, houston, denver, san, diego, sf, austin, est, chicago, los, seattle, hollywood, yabnkees, york, boston, washington, angeles, bears, ny, miami, dc, fl, orlando	00.10-50.93					GMM, MLE	Conference	International Conference on Advances in Social Network Analysis and Mining	B4	Chang, H. W., Lee, D., Eltaher, M., & Lee, J. (2012, August). @ Phillies tweeting from Philly? Predicting Twitter user locations with spatial word usage. In Proceedings of the 2012 International Conference on Advances in Social Networks Analysis and Mining (ASONAM 2012) (pp. 111-118). IEEE Computer Society.
Cheng, Z., Caverlee, J., & Lee, K.	2010	Location	Twitter	Tweets	1074375	29479600	NR	25.00-78.80					SC	Conference	ACM International Conference on Information and Knowledge Management	A	Cheng, Z., Caverlee, J., & Lee, K. (2010). You Are Where You Tweet : A Content-Based Approach to Geo-locating Twitter Users. Proceedings of the 19th ACM International Conference on Information and Knowledge Management, 759–768. https://doi.org/10.1145/1871437.1871535
Duong, D. T., Pham, S. B., & Tan, H.	2016	Location (North, South)	Forums (Vietnamese: Webtretho, Otofun, Tinhte)	Character-based Features, Stylometric Features, Word-based Features , Syntactic, Content		6831	NR	65.73-80.06					J48, BNet, SVM	Book	Recent Developments in Intelligent Information and Database Systems	NR	Duong, D. T., Pham, S. B., & Tan, H. (2016). Using content-based features for author profiling of Vietnamese forum posts. In Recent Developments in Intelligent Information and Database Systems (pp. 287-296). Springer International Publishing.
Estival, D.	2008	Country (Aus/NZ, Egypt, Other, USA)	Email messages	Character Features, Linguistic Features	1,033 (English)	9,836 (English)	NR	81.13 (English)					ABM1, BAG, J48, RF, IBL, Jrip, SVM, SMO	Journal	Journal of Science	NR	Estival, D. (2008). Author attribution with email messages. Journal of Science, Vietnam National University, 1, 1-9.
Estival, D., Gaustad, T., Pham, S. B., Radford, W., & Hutchinson, B.	2007	Country (Aus/NZ, Egypt, Other, USA)	Email messages	Character Features, Lexical Features, Structural Features	1,033 (English)	9,836 (English)	NR	81.13					ABM1, BAG, J48, RF, IBL, Jrip, SVM, SMO	Conference	Conference of the Pacific Association for Computational Linguistics	B	Estival, D., Gaustad, T., Pham, S. B., Radford, W., & Hutchinson, B. (2007). Author profiling for English emails. In Proceedings of the 10th Conference of the Pacific Association for Computational Linguistics (pp. 263-272).
Estival, D., Gaustad, T., Hutchinson, B., Pham, S., Radford, W.	2008	Country (Aus/NZ, Egypt, Other, USA)	Email messages	Character Features, Lexical Features, Structural Features	1,033 (English) 1,030 (Arabic)		NR	81.13 (English)					BAG, IBL, SVM, SMO, RF	Technical Report	Technical Report	NR	Estival, D., Gaustad, T., Hutchinson, B., Pham, S., Radford, W. (2008). Author Profiling for English and Arabic Emails.
Hecht, B., Hong, L., Suh, B., & Chi, E. H.	2011	Country	Twitter	Tweet Content	5000000	32000000	calgari = Canada, brisban = Australia, coocanuck = Canada, afl = Australia, clegg = UK, cbc - Canada, yelp = US, colorado = Colorado, elk = Colorado, redsox = Massachusetts, biggbi = Michigan, gamecock = South Carolina, crawfish - Louisiana, mccain = Arizona	20.15-88.86					MNB	Conference	CHI Conference on Human Factors in Computing Systems	A/A1	Hecht, B., Hong, L., Suh, B., & Chi, E. H. (2011, May). Tweets from Justin Bieber's heart: the dynamics of the location field in user profiles. In Proceedings of the SIGCHI conference on human factors in computing systems (pp. 237-246). ACM.
Ikeda, K., Hattori, G., Ono, C., Asoh, H., & Higashino, T.	2013	Region: Hokkaido/Tohoku, Kanto, Hokushietsu, Tokai, Kinki, Chugoku/Shikoku, Kyushu/Okinawa	Twitter	Tweets	100000		NR			00.45-00.81			SVM	Journal	Knowledge-Based Systems	Q1	Ikeda, K., Hattori, G., Ono, C., Asoh, H., & Higashino, T. (2013). Twitter user profiling based on text and community mining for market analysis. Knowledge-Based Systems, 51, 35-47.
Jones, R., Kumar, R., Pang, B., & Tomkins, A.	2007	Location (Post code - Zip 1, Zip 2, Zip 3, Zip 4, Zip 5)	Yahoo! User profiles, Yahoo! Query logs	Query Logs	744000		fanfiction, bridal, makeup, women's, knitting, hair, ecards, glitter, yoga, diet - female, nfl, poker, espn, ufc, railroad, prostate, football, golf, male, wrestling, compusa, adult terms - male. Myspace, pregnancy, wikipedia, lyrics, quotes, apartments, torrent, baby, wedding, mall, soundtrack - youth, aarp, telephone, lottery, amazon.com, retirement, funeral, senior, mapquest, mediocre, newspap…	06.27-54.10					SVM	Conference	ACM International Conference on Information and Knowledge Management	A	Jones, R., Kumar, R., Pang, B., & Tomkins, A. (2007, November). I know what you did last summer: query logs and user privacy. In Proceedings of the ACM conference on Sixteenth Conference on information and knowledge management
Jurgens, D. (2013).	2013	Location	Twitter, Foursquare	Twitter: Geo-tagged Tweets (From friends in ego-network) Foursquare: Self-reported Locations (From friends in ego-network)	3,000,000 (Foursquare) 47,000,000 (Twitter)	17,000,000 (Foursquare) 254,000,000 (Twitter)							AO	Conference	ICWSM	B1	Jurgens, D. (2013). That's What Friends Are For: Inferring Location in Online Social Media Platforms Based on Social Relationships. ICWSM, 13(13), 273-282.
Li, R., Wang, S., & Chang, K. C. C.	2012	Home Location	Twitter	Profile Home Locations, Tweet Content, Network data	139180	83508000	NR	49.67-62.30					AO	Conference	VLDB Endowment	NR	Li, R., Wang, S., & Chang, K. C. C. (2012). Multiple location profiling for users and relationships from social network and content. Proceedings of the VLDB Endowment, 5(11), 1603-1614.
Li, R., Wang, S., Deng, H., Wang, R., & Chang, KCC.	2012	Home Location	Twitter	Profile Home Locations, Tweet Content, Network data	139180		NR	49.70-65.90					AO	Conference	SIGKDD international conference on Knowledge discovery and data mining	A	Li, R., Wang, S., Deng, H., Wang, R., & Chang, KCC (2012, August). Towards social profiling user: discriminative influence and unified model for inferring home locations. In Proceedings of the 18th ACM SIGKDD international conference on Knowledge discovery and data mining (pp. 1023-1031). ACM.
Liu, Y., Song, H. H., Bermudez, I., Mislove, A., Baldi, M., & Tongaonkar, A.	2015	Location: Geo (Latitude/Longitude), Post Code	Smartphones	Network Traffic Traces	1 (Lab Traffic Dataset) 13,000 (Real ISP Dataset)	9,227 HTTP Flows, 20,810 Tuples (Lab Traffic Dataset) 40,775,119 HTTP Flows, 51,368,712 Tuples (Real ISP Dataset)	NR						AO	Conference	Conference on Online Social Networks	NR	Liu, Y., Song, H. H., Bermudez, I., Mislove, A., Baldi, M., & Tongaonkar, A. (2015, November). Identifying personal information in internet traffic. In Proceedings of the 2015 ACM on Conference on Online Social Networks (pp. 59-70). ACM.
Mahmud, J., Nichols, J., & Drews, C.	2012	Home Location	Twitter, Foursquare	Tweet Content, Tweeting Behaviour, External Location Knowledge	9551	1000000	NR			00.13-00.78			MNB	Conference	ICWSM	B1	Mahmud, J., Nichols, J., & Drews, C. (2012). Where Is This Tweet From? Inferring Home Locations of Twitter Users. Icwsm, 511–514. https://doi.org/papers3://publication/uuid/8AAE166A-DE81-42AB-83BC-5E014B7B0039
McGee, J., Caverlee, J., & Cheng, Z.	2013	Location	Twitter	Reciprocal Friend, Just Friend, Just Follower, Just Mentioned (All location data from users' profiles and geo-coded tweets)	249,584 (Target Users) 894,617 (Geocoded Users)	10,000,000 Located Contacts 71,000,000 Leafs	NR	56.50-63.90%					DT, MLE	Conference	ACM International Conference on Information and Knowledge Management	A	McGee, J., Caverlee, J., & Cheng, Z. (2013, October). Location prediction in social media based on tie strength. In Proceedings of the 22nd ACM international conference on Information & Knowledge Management (pp. 459-468). ACM.
Pham, D. D., Tran, G. B., & Pham, S. B.	2009	Geographic Origin (North Vietnam, South Vietnam, Other)	Blogs	Language Features: Character-based, Content-based, Content-specific, Function Words, Lexicon, Line-based, Paragraph-based, POS-based, Structural, Word-based	73	3524	NR	32.97-78.01%					BAG, BN, J48, NB, MP, RF, RT, IBL, SMO	Conference	International Conference on Asian Language Processing	NR	Pham, D. D., Tran, G. B., & Pham, S. B. (2009, December). Author profiling for Vietnamese blogs. In Asian Language Processing, 2009. IALP'09. International Conference on (pp. 190-194). IEEE.
Pontes, T., Magno, G., Vasconcelos, M., Gupta, A., Almeida, J., Kumaraguru, P., & Almeida, V.	2012	Home Location	Foursquare, Google+, Twitter	Location Attributes	13,570,060 (Foursquare) 27,556,390 (Google+) 19,684,469 (Twitter)	15,898,484 Venues, 15,149,981 Mayorships, 10,618,411 Tips, 9,989,325 Likes (Foursquare) 20,331,140 (Twitter)	NR	50.09-67.41 Foursquare 7.56-71.82 Google+ 79.17-82.50 Twitter					AO	Conference	International Conference on Data Mining Workshops	A/A1	Pontes, T., Magno, G., Vasconcelos, M., Gupta, A., Almeida, J., Kumaraguru, P., & Almeida, V. (2012, December). Beware of what you share: Inferring home location in social networks. In Data Mining Workshops (ICDMW), 2012 IEEE 12th International Conference on (pp. 571-578). IEEE.
Pontes, T., Vasconcelos, M., Almeida, J., Kumaraguru, P., & Almeida, V.	2012	Location: Home City, Home State, Home Country	Foursquare	Tips, Dones, Mayorships	13,570,060 (Foursquare) 27,556,390 (Google+) 19,684,469 (Twitter)	15,898,484 Venues, 15,149,981 Mayorships, 10,618,411 Tips, 9,989,325 Likes (Foursquare) 20,331,140 (Twitter)	NR	50.09-67.41 Home City 89.12-93.67 Home Country 69.74 - 80.92 Home State					AO	Conference	International Conference on Ubiquitious Computing	A1	Pontes, T., Vasconcelos, M., Almeida, J., Kumaraguru, P., & Almeida, V. (2012, September). We know where you live: privacy characterization of foursquare behavior. In Proceedings of the 2012 ACM conference on ubiquitous computing (pp. 898-905). ACM.
Popescu, A., & Grefenstette, G.	2010	Home Location	Flickr	Tags	30000		NR	82.90-89.60 (All/US) 77.90-86.10 (All/UK) 77.30-86.10 (All/France) 77.10-85.70 (All/Denmark) 77.00-85.60 (All/Italy) 76.30-85.70 (All/Spanish)			00.84-00.92 France 00.81-00.92 Germany 00.86-00.95 Italy 00.80-00.91 Spain 00.83-00.93 UK 00.81-00.93 US	00.27-00.71 France 00.22-00.64 Germany 00.25-00.78 Italy 00.22-00.66 Spain 00.32-00.79 UK 00.33-00.76 US	AO	Conference	AAAI International Conference on Weblogs and Social Media	B1	Popescu, A., & Grefenstette, G. (2010). Mining User Home Location and Gender from Flickr Tags. Fourth International AAAI Conference on Weblogs and Social Media, 307–310. https://doi.org/papers3://publication/uuid/7DB41A8E-EE73-4B31-AD14-A9EE2D3C668A
Rao, D., & Yarowsky, D.	2010	Location: Regional Origin (North India, South India)	Twitter	Sociolinguistic Features	1000	497337	NR	63.37-82.82					SVM	Conference	Conference on Neural Information Processing Systems	A1	Rao, D., & Yarowsky, D. (2010). Detecting latent user properties in social media. In In Proc. of the NIPS MLSN Workshop.
Rao, D., Yarowsky, D., Shreevats, A., & Gupta, M.	2010	Location: Regional Origin (North India, South India)	Twitter	Language: Ngrams, Sociolinguistic Features	2000	497337	NR	72.92-77.08					SVM	Conference	ACM International Conference on Information and Knowledge Management	A/A1	Rao, D., Yarowsky, D., Shreevats, A., & Gupta, M. (2010, October). Classifying latent user attributes in twitter. In Proceedings of the 2nd international workshop on Search and mining user-generated contents (pp. 37-44). ACM.
Rossi, L., & Musolesi, M.	2014	Location : City	Brightkite, Gowalla, Foursquare	Check-in Data	58,228 (Brightkite) 18,107 (Foursquare) 196,591 (Gowalla)	4,491,143 Check-ins, 772,764 Locations (Brightkite) 2,073,740 Check-ins, 43,063 Locations (Foursquare) 6,442,890 Check-ins 1,280,969 Locations (Gowalla)	NR	7.50-95.10					MCC	Conference	Conference on Online Social Networks	NR	Rossi, L., & Musolesi, M. (2014, October). It's the way you check-in: identifying users in location-based social networks. In Proceedings of the second ACM conference on Online social networks (pp. 215-226). ACM.
Rout, D., Bontcheva, K., Preoţiuc-Pietro, D., & Cohn, T.	2013	Location: City, Region	Twitter	Friendship Connections	206200		NR	9.17-95.59					SVM	Conference	ACM Conference on Hypertext and Social Media	A/A2	Rout, D., Bontcheva, K., Preoţiuc-Pietro, D., & Cohn, T. (2013, May). Where's@ wally?: a classification approach to geolocating users based on their social ties. In Proceedings of the 24th ACM Conference on Hypertext and Social Media (pp. 11-20). ACM. https://doi.org/10.1145/2481492.2481494
Seneviratne, S., Seneviratne, A., Mohapatra, P., & Mahanti, A.	2014	Location: Origin, Residence	Smartphones	Applications	8,653 (Appbrain) 841 (Appaware) 369 (Apptronomy)		NR				00.40-1.00	00.05-0.37	SVM	Newsletter	ACM SIGMOBILE Mobile Computing and Communications Review	NR	Seneviratne, S., Seneviratne, A., Mohapatra, P., & Mahanti, A. (2014). Predicting user traits from a snapshot of apps installed on a smartphone. Mobile Computing and Communications Review, 18(2), 1–8. https://doi.org/10.1145/2636242.2636244.
Sloan, L., Morgan, J., Housley, W., Williams, M., Edwards, A., Burnap, P., & Rana, O.	2013	Country, State, County, City, Postcode	Twitter	Tweets	13260819	113828224	NR						NR	Journal	Sociological Research Online	Q2	Sloan, L., Morgan, J., Housley, W., Williams, M., Edwards, A., Burnap, P., & Rana, O. (2013). Knowing the tweeters: Deriving sociologically relevant demographics from Twitter. Sociological research online, 18(3), 1-11.
Vijayaraghavan, P., Vosoughi, S., & Roy, D.	2017	Location - US States	Twitter	Profile Features (eg. Name, Profile Picture, Description, Followers)		16956	NR			00.67-00.68 Macro F1			DMMMT, RF, SVM	Conference	Annual Meeting of the Association for Computational Linguistics	A1	Vijayaraghavan, P., Vosoughi, S., & Roy, D. (2017). Twitter Demographic Classification Using Deep Multi-modal Multi-task Learning. In Proceedings of the 55th Annual Meeting of the Association for Computational Linguistics (Volume 2: Short Papers) (Vol. 2, pp. 478-483).
Zheng, D., Hu, T., You, Q., Kautz, H., & Luo, J.	2014	Home Location	Flickr	Spatial Features, Temporal Features, Visual Features	192	47793	NR	72.00 (within 70m) 79.00 (with distance error tolerance = 1km)					CNN, SVM	Conference	Geotagging and its Applications on Multimedia	NR	Zheng, D., Hu, T., You, Q., Kautz, H., & Luo, J. (2014, November). Inferring home location from user's photo collections based on visual content and mobility patterns. In Proceedings of the 3rd ACM Multimedia Workshop on Geotagging and Its Applications in Multimedia (pp. 21-26). ACM.
Zheng, D., Hu, T., You, Q., Kautz, H. A., & Luo, J.	2015	Home Location, Vacation Location	Flickr	Photo Geotags	1,000 1,000 Users, 183,291 Geotagged Photos - Home Location 404 Users, 31,000 Unique Samples - Vacation Location	423,047 1,000 Users, 183,291 Geotagged Photos - Home Location 404 Users, 31,000 Unique Samples - Vacation Location	NR	71.00 Home			00.59 Vacation Location	0.59	CNN, SVM	Conference	ICWSM	B1	Zheng, D., Hu, T., You, Q., Kautz, H. A., & Luo, J. (2015, April). Towards Lifestyle Understanding: Predicting Home and Vacation Locations from User's Online Photo Collections. In ICWSM (pp. 553-561).
