# Supplementary material for: What demographic attributes do our digital footprints reveal? A systematic review
Source: PLoS One. 2018 Nov 28;13(11):e0207112. doi: 10.1371/journal.pone.0207112 (PMC6261568; doi:10.1371/journal.pone.0207112)
Supplement: S5 Table — (XLSX) [file pone.0207112.s005.xlsx]

## Sheet: Political Orientation
Authors	Year	Classes	Platform	Predictors/Features	No. Users	No. Digital Traces	Top Predictors	Accuracy %	AUC	F-score	Precision	Recall	Classifiers/Methods Used	Article Type	Conference/Journal Title	Quality	Reference
Al Zamal, F., Liu, W., & Ruths, D.	2012	Democrat, Republican	Twitter	Friend's Posts: k-top Words, k-top Stems, k-top Digrams and Trigrams, k-top Co-stems, k-top Hashtags, Frequency Statistics, Retweets, Neighborhood Size Neighborhood Policies: All (Friends), n-most Popular, n-least Popular, n-closest Profile Features	400 1,000 tweets per user	400000	NR	72.50-93.20					SVM	Conference	ICWSM	B1	Al Zamal, F., Liu, W., & Ruths, D. (2012). Homophily and Latent Attribute Inference: Inferring Latent Attributes of Twitter Users from Neighbors. ICWSM, 270.
Ardehaly, E. M., & Culotta, A.	2015	Democrat, Republican	Twitter	Follower Accounts Language: Description Field, Hashtags, Name Field, Tweet Text	189 Democratic (Politician Dataset) 188 Republican (Politician Dataset) 598 Likely Democrats (Politican-follower Dataset) 632 Likely Republicans (Politician-follower Dataset)	37,800 Democratic (Politician Dataset) 37,600 Republican (Politician Dataset) 117,800 Likely Democrats (Politican-follower Dataset) 126,400 Likely Republicans (Politician-follower Dataset)	County: eugene, oregon, nesn, university (democratic), colts, beach, tahoe, indiana, jgfortwayne (republican), Follow: keithellison, repjohnlewis, sensanders, thinkprogres, thenation (democratic), gopleader, senmikelee, senrandpaul, gop, glennbeck (republican)	58.10-93.80 (Politician Dataset) 56.50-81.70 (Politician-follower Dataset)					M Log-R	Conference	Conference of the North American Chapter of the Association for Computational Linguistics: Human Language Technologies	A1	Ardehaly, E. M., & Culotta, A. (2015). Inferring latent attributes of Twitter users with label regularization. North American Chapter of the Association of Computational Linguistics.
Ardehaly, E. M., & Culotta, A.	2018	Democrat, Republican	IMDB, Twitter	County, Followers, Movie Reviews, Name, Tweets	50,000 (IMDB) 189 Democratic (Politician Dataset) 188 Republican (Politician Dataset) 598 Likely Democrats (Politican-follower Dataset) 632 Likely Republicans (Politician-follower Dataset)	37,800 Democratic (Politician Dataset) 37,600 Republican (Politician Dataset) 117,800 Likely Democrats (Politican-follower Dataset) 126,400 Likely Republicans (Politician-follower Dataset)	NR	78.20-91.00 (Politician Dataset) 70.10-73.30 (Politician-follower Dataset)					AO, Log-R, RANSAC, RR	Journal	Social Network Analysis and Mining	Q2	Ardehaly, E. M., & Culotta, A. (2018). Learning from noisy label proportions for classifying online social data. Social Network Analysis and Mining, 8(1), 2.
Barberá, P.	2015	Continuous Variable (Left - Right)	Twitter	Following	301357		NR						B	Journal	Political Analysis	Q1	Barberá, P. (2015). Birds of the same feather tweet together: Bayesian ideal point estimation using Twitter data. Political Analysis, 23(1), 76-91.
Barberá, P.	2016	Democrat, Republican, Unaffiliated	Twitter	Language: Tweets, Emoticons, Twitter Handles	250000	1000000000	Democrat: philly, barackobama, la, sf, pittsburgh, women, nytimes, philadelphia, president, gop, hilaryclinton, gay, @BarackObama, @rhianna, @maddow, @billclinton, @kholekardashian, @billmaher, @Oprah Republican: church, foxnews, christmas, oklahoma, florida, realdonaldtrump, golf, beach, megankelly, @FoxNews, @danieltosh, @TimTebow, @MittRomney, @taylorswift13, @jimmyfallon, @RyanSeacrest Unaffi…	58.00-76.00			00.47-00.59	00.22-00.66	B	Working paper	NA	NA	Barberá, P. (2016). Less is more? How demographic sample weights can improve public opinion estimates based on Twitter data. Working Paper.
Bi, B., Shokouhi, M., Kosinski, M., & Graepel, T.	2013	Democrat, Republican	Bing	Likes Profile Data (myPersonality) Search Queries (Bing)	3.3M users, 133M queries (Bing Query Logs > 457,000 users, 122,000 unique likes (myPersonality Dataset)	122,000 (myPersonality Dataset) 133,000,000 (Bing Dataset)	Arts/History, Arts/Movies, Politics/Conservatism, Politics/Liberalism, Society/History, Science/Social_Sciences						Log-R L2	Conference	International Conference of the World Wide Web	A/A1	Bi, B., Shokouhi, M., Kosinski, M., & Graepel, T. Inferring the Demographics of Search Users. In Proceedings of Proceedings of the 22nd international conference on World Wide Web (pp. 131-140). https://doi.org/10.1145/1835449.1835537
Boutet, A., & Yoneki, E.	2011	Conservative, Labour, Liberal Democrats	Twitter	Activity, Mentions, Retweets	NR		NR	70.00-80.00					B	Workshop	DYNAM: Proceedings of the 1st International Workshop on Dynamicity	NA	Boutet, A., & Yoneki, E. (2011, December). Member classification and party characteristics in twitter during uk election. In DYNAM: Proceedings of the 1st International Workshop on Dynamicity (p. 18).
Boutet, A., Kim, H., & Yoneki, E.	2012	Conservative, Labour, Liberal Democrats	Twitter	Mentions, Network Structure, Retweets Tweet Contents: No. Hashtags, References to Specific Parties, URLs	200000	1150000	NR	60.00-86.00					AO, B, SVM	Conference	ICWSM	B1	Boutet, A., Kim, H., & Yoneki, E. (2012, June). What's in your tweets? I know who you supported in the UK 2010 general election. In The International AAAI Conference on Weblogs and Social Media (ICWSM).
Boutet, A., Kim, H., & Yoneki, E.	2013	Conservative, Labour, Liberal Democrats	Twitter	Activity, Content, Influence, Structure and Interaction, Sentiment Features	200000	1150000	NR	54.00-92.00					AO, SVM	Journal	Social Network Analysis and Mining	Q2	Boutet, A., Kim, H., & Yoneki, E. (2013). What’s in Twitter, I know what parties are popular and who you are supporting now!. Social Network Analysis and Mining, 3(4), 1379-1391.
Cohen, R., & Ruths, D.	2013	Democrat, Republican	Twitter	Hashtags: Politically discriminitive, Politically neutral (Political Figures Dataset) Explicit mentions in a user's profile of a political orientation (Politically Active Dataset) Those who do not make any mention of political parties or politically discriminitive hashtags in their profiles (Politically Modest Dataset)	1,837 (Politically Active Dataset) 397 (Political Figures Dataset) 262 (Politically Modest Dataset) 196 users (Conover Dataset)	1,837,000 (Politically Active Dataset) 397,000 (Political Figures Dataset) 262,000 (Politically Modest Dataset) 196 users (Conover Dataset)	Political Figures Dataset: #budget, #debt, #gop, #healthcare, #jobs, #jobsact, #medicare, #Obama, #Obamacare, #tcot	87.00 (Conover Dataset) 84.00 (Politically Active Dataset) 91.00 (Political Figures Dataset) 68.00% (Politically Modest Dataset)					LLDA, SVM	Conference	ICWSM	B1	Cohen, R., & Ruths, D. (2013, June). Classifying political orientation on Twitter: It's not easy!. In ICWSM.
Colleoni, E., Rozza, A., & Arvidsson, A.	2014	Democrat, Republican	Twitter	Network Data: Nodes, Ties, Tweets	1,683 (Democrat) 8,868 (Republican)	28,167 (Democrat) 189,933 (Republican)	NR	79.50-96.00		00.80-00.92	00.78-00.93	00.82-00.91	AO	Journal	Journal of Communication	Q1	Colleoni, E., Rozza, A., & Arvidsson, A. (2014). Echo chamber or public sphere? Predicting political orientation and measuring political homophily in Twitter using big data. Journal of Communication, 64(2), 317-332.
Conover, M. D., Gonçalves, B., Ratkiewicz, J., Flammini, A., & Menczer, F.	2011	Popular Right, Popular Left	Twitter	Clusters: Retweet Network Cluster Structure Language (Tweets): Content (Full Text, Unigrams) Hashtags	956		Hashtags: dadt, dems, ftrs, gop, hcr, hhrs, lgbt, ma04, ocra, onenation, p2, p2b, p21, rs, sgp, tcot, tlot, topprog, tpp, twisters, votedem, whyimvotingdemocrat Popular Left Websites: dailykos.com, feedproxy.google.co, harryreid.com, mediamatters.org, msnbc.msn.com, politicalwind.com, thinkprogress.org, truthy-out.org, youtube.com realclearpolitics.com, www.google.com, twitwall.com, thedailybeast…	79.20-94.90					LSA, SVM	Conference	International Conference on Social Computing and its Applications	B4	Conover, M. D., Gonçalves, B., Ratkiewicz, J., Flammini, A., & Menczer, F. (2011, October). Predicting the political alignment of twitter users. In Privacy, Security, Risk and Trust (PASSAT) and 2011 IEEE Third Inernational Conference on Social Computing (SocialCom), 2011 IEEE Third International Conference on (pp. 192-199). IEEE.
Culotta, A., & Cutler, J.	2016	Democrat, Republican	Twitter, Quantcast	Language: Textual Content, Social Network Data	1066		Democrats: BarackObama, MichelleObama, NewYorker, Oprah, UncleRUSH Republican: DRUDGE_REPORT, FoxNews, megynkelly, michellemalkin, seanhannity			00.56-00.83			ENR, MEN, RR	Journal	Journal of Artifical Intelligence Research	A	Culotta, A., & Cutler, J. (2016). Predicting Twitter User Demographics using Distant Supervision from Website Traffic Data, 55, 389–408.
Durant, K. T., & Smith, M. D.	2007	Popular Right, Popular Left	Website: www.themoderatevoice.com	Language: Unigrams	250		NR	89.77					NB, SVM	Conference	International Workshop on Knowledge Discovery on the Web	B1/C	Durant, K. T., & Smith, M. D. (2007). Predicting the political sentiment of web log posts using supervised machine learning techniques coupled with feature selection. Lecture Notes in Computer Science (Including Subseries Lecture Notes in Artificial Intelligence and Lecture Notes in Bioinformatics), 4811 LNAI, 187–206. https://doi.org/10.1007/978-3-540-77485-3_11
Jiang, M., & Argamon, S.	2008	Conservative, Liberal	Blogs: blogcatalog.com (Democratic, Republican), blogarama.co (Left, Right), etalkinghead.com (Conservative, Liberal), campaignsandelections.com (Conservative, Liberal), blogs.botw.org (Conservative, Liberal)	Language: Bag-of-Words, Out Links		793 (Conservative) 1,054 (Liberal) 2,809 (Non-political)	Conservative: bots, coolwiz, crooks, fearfully, firedoglake, holies, liars, marsh, oasis, pandagon, progressive, reagan21, squelch Liberal: bikinis, chopped, crooks, firedoglake, footballs, hugh, magnifies, pandagon, shutup, skippy, tapped, wizbang	76.62-91.40		00.74-00.91	00.66-00.90 (Conservative) 00.72-00.88 (Liberal)	00.49-00.90 (Conservative) 00.73-00.94 (Liberal)	SVM	Conference	SIAM International Conference on Data Mining	A/A2	Jiang, M., & Argamon, S. (2008, April). Finding political blogs and their political leanings. In Proceedings of SIAM Text Mining Workshop (Vol. 12).
Jiang, M., & Argamon, S.	2008	Conservative, Liberal	Blogs	Language: Bag-of-Words, Opinion Expressions, Link Features		793 blogs (Conservative) 1,054 blogs (Liberal) 2,809 blogs (Non-political)	Liberal Negative: american iraq, foreign policy, human rights, iraq kill, military iraq Liberal Positive: democratic candidate, democratic party, gay marriage, national security, political party Conservative Negative: alien, burn, flag, illegal, illegal immigration, senator, trackback, vote, vote burn Conservative Positive: bookmarking page discover, public school, federal government, real estate…	75.96-84.96		00.70-00.85	00.64-00.81 (Conservative) 00.76-00.89 (Liberal)	00.70-00.86 (Conservative) 00.70-00.84 (Liberal)	RB	Conference	ACM International Conference on Research and Development in Information Retrieval	A	Jiang, M., & Argamon, S. (2008, July). Exploiting subjectivity analysis in blogs to improve political leaning categorization. In Proceedings of the 31st annual international ACM SIGIR conference on Research and development in information retrieval (pp. 725-726). ACM.
Jiang, M., & Argamon, S.	2008	Conservative, Liberal	Blogs	Language: Bag-of-Words, Subjective Sentences		793 blogs (Conservative) 1,054 blogs (Liberal) 2,809 blogs (Non-political)	Liberal Negative: american iraq, foreign policy, human rights, iraq kill, military iraq Liberal Positive: democratic candidate, democratic party, gay marriage, national security, political party Conservative Negative: alien, burn, flag, illegal, illegal immigration, senator, trackback, vote, vote burn Conservative Positive: bookmarking page discover, federal government, page link, public school, …	69.94-84.96		00.70-00.85	00.64-00.81 (Conservative) 00.76-00.89 (Liberal)	00.70-00.86 (Conservative) 00.67-00.84 (Liberal)	SVM	Conference	International con	NR	Jiang, M., & Argamon, S. (2008). Political Leaning Categorization by Exploring Subjectivities in Political Blogs. In DMIN (pp. 647-653).
Kosinski, M., Stillwell, D., & Graepel, T.	2013	Democrat, Republican	Facebook	Likes	9752		Democrat: Democrats, Being Liberal, Health Care Reform, The White House Republican: Conservative, John McCain, Rush Limbaugh, Sarah Palin, Sean Hannity		0.85				Log-R	Journal	PNAS	Q1	Kosinski, M., Stillwell, D., & Graepel, T. (2013). Private traits and attributes are predictable from digital records of human behavior. Proceedings of the National Academy of Sciences of the United States of America, 110(15), 5802–5. https://doi.org/10.1073/pnas.1218772110
Lampos, V., Preotiuc-Pietro, D., & Cohn, T.	2013	Austria: Freedom Party (FPO), Green Alternative Party (DRU), People'sParty (OVP), Social Democratic Party (SPO) UK: Conservative, Labour, Liberal Democrats	Twitter	Tweets	1,100 (Austria) 42,000 (UK)	800,000 (Austria) 60,000,000 (UK)	NR						BEN, MTL	Conference	Annual Meeting of the Association for Computational Linguistics	A1	Lampos, V., Preotiuc-Pietro, D., & Cohn, T. (2013, January). A user-centric model of voting intention from Social Media. In ACL (1) (pp. 993-1003).
Makazhanov, A., Rafiei, D., & Waqar, M.	2013	Alberta Liberals (LIB), New Democratic Party (NDP), Progressive Conservative Party (PC), Wildrose Alliance Party (WAP)	Twitter	Behavioural Features, Content Features	256		Followees count, interactions count, interactions frequency, interactions weight, negative terms, per interaction, positive terms, retweets count	48.00-68.00 (Alberta) 43.00-87.00 (Pakistan)					J48, Log-R	Journal	Social Network Analysis and Mining	Q2	Makazhanov, A., Rafiei, D., & Waqar, M. (2014). Predicting political preference of Twitter users. Social Network Analysis and Mining, 4(1), 193.
Pennacchiotti, M., & Popescu, A. M.	2011	Democrat, Republican	Twitter	Domain Specific LDA, Generic LDA, Prototypical Hashtags, Prototypical Words, Sentiment Words	10338		iPhone, Starbucks, Star-bucks Replies: Aerocles, GoldenMiley, GoodCharlotte, Heyitsmimila Retweets: Nordstrom, Orbitz, Starbucks, TheBieberFun, WholeFoods			00.11-00.92	00.44-00.99	00.06-00.99	GBDT	Conference	ICWSM	B1	Pennacchiotti, M., & Popescu, A. M. (2011). A Machine Learning Approach to Twitter User Classification. Icwsm, 11(1), 281-288.
Preoţiuc-Pietro, D., Liu, Y., Hopkins, D., & Ungar, L.	2017	Moderately Conservative, Very Conservative, Moderately Liberal, Very Liberal	Twitter	Language: LIWC, Political Terms, Sentiment and Emotions, Unigrams, Word2Vec Topics	3938	4833133	Moderately Conservative: bless, checked, christ, followed, praying, start, will Very Conservative: faithful, god, lord, pray, prayer, praying Moderately Liberal: actual, court, geez, goddamn, horrible, hilarious, rape, shitty Very Liberal: actual, being, but, entire, gay, there's, weird, why	22.20-27.60	0.57-0.97				Lin-R, Log-R	Conference	Annual Meeting of the Association for Computational Linguistics	A1	Preoţiuc-Pietro, D., Liu, Y., Hopkins, D., & Ungar, L. (2017). Beyond binary labels: political ideology prediction of twitter users. In Proceedings of the 55th Annual Meeting of the Association for Computational Linguistics (Volume 1: Long Papers) (Vol. 1, pp. 729-740).
Rao, D., & Yarowsky, D.	2010	Democrat, Republican	Twitter	Sociolinguistic Features	200	1986392	Democrat: my_lakers, my_synagogue, my_tofurkey, my_upscale, my_vegetarianism, my_yoga, my_youthful Republican: my_lsu, my_patriot, my_trucker, my_walmart, my_weapons, my_yuengling, my_zionist	72.92-77.08					SVM	Conference	Conference on Neural Information Processing Systems	A1	Rao, D., & Yarowsky, D. (2010). Detecting latent user properties in social media. In In Proc. of the NIPS MLSN Workshop.
Rao, D., Yarowsky, D., Shreevats, A., & Gupta, M.	2010	Democrat, Republican	Twitter	Language: Ngrams Sociolinguistic Features: Character Repetition, Elipses, Emoticons, OMG, Puzzled Punctuation, Repeated Exclamation	400	1986392	Democrat: my_tofurkey, my_upscale, my_vegetarianism, my_yoga, my_youthful Republican: my_walmart, my_weapons, my_yuengling, my_zionist	63.37-82.84					SVM	Conference	ACM International Conference on Information and Knowledge Management	A/A1	Rao, D., Yarowsky, D., Shreevats, A., & Gupta, M. (2010, October). Classifying latent user attributes in twitter. In Proceedings of the 2nd international workshop on Search and mining user-generated contents (pp. 37-44). ACM.
Sylwester, K., & Purver, M.	2015	Democrat, Republican	Twitter	Language (Tweets): LIWC	3 American Democratic Accounts, 5,373 Followers 3 Republican Congressional Organisations, 5,386 Followers	457,372 466,386	Democrats: amaz, day, feel, fuck, got, happi, just, know, life, like, lol, love, much, n't, realli, shit, watch, women, work, worldcup Republicans: america, american, benghazi, conserv, countri, god, govern, great, illeg, lie, liber, obam, obama, obamacar, run, state, tax, tcot, vote, will						Log-R	Journal	Plos One	Q1	Sylwester, K., & Purver, M. (2015). Twitter language use reflects psychological differences between democrats and republicans. PloS one, 10(9), e0137422.
Theodoridis, T., Papadopoulos, S., & Kompatsiaris, Y.	2015	Conservative, Liberal	Facebook	Likes (myPersonality Dataset)	4106		NR		00.77-00.78				Log-R	Conference	International Conference of the World Wide Web	A/A1	Theodoridis, T., Papadopoulos, S., & Kompatsiaris, Y. (2015, May). Assessing the reliability of facebook user profiling. In Proceedings of the 24th International Conference on World Wide Web (pp. 129-130). ACM.
Vijayaraghavan, P., Vosoughi, S., & Roy, D.	2017	Democrat, Republican	Twitter	Profile Features: Name, Profile Picture, Description, Followers, Tweets		5225	NR			00.79-00.86 Macro F1			DMMMT, RF, SVM	Conference	Annual Meeting of the Association for Computational Linguistics	A1	Vijayaraghavan, P., Vosoughi, S., & Roy, D. (2017). Twitter Demographic Classification Using Deep Multi-modal Multi-task Learning. In Proceedings of the 55th Annual Meeting of the Association for Computational Linguistics (Volume 2: Short Papers) (Vol. 2, pp. 478-483).
Volkova, S., & Bachrach, Y.	2015	Conservative, Liberal	Twitter	Language: Lexical, Lexicon, Negation, Postags, Stylistic	123513	24919528	NR		0.72				Log-R	Journal	Cyberpsychology, Behaviour and Social Networking	Q1	Volkova, S., & Bachrach, Y. (2015). On Predicting Sociodemographic Traits and Emotions from Communications in Social Networks and Their Implications to Online Self-Disclosure. Cyberpsychology, Behavior and Social Networking, 18(12), 726–36. https://doi.org/10.1089/cyber.2014.0609
Volkova, S., Bachrach, Y., & Van Durme, B.	2016	Conservative, Liberal	Twitter	Content Features (From tweets), Context Features (From user interests)	4129	200	NR		00.67-00.72				Log-R	Conference	IEEE Second International Conference on Big Data Computing Service and Applications	NR	Volkova, S., Bachrach, Y., & Van Durme, B. (2016, March). Mining user interests to predict perceived psycho-demographic traits on Twitter. In Big Data Computing Service and Applications (BigDataService), 2016 IEEE Second International Conference on (pp. 36-43). IEEE.
Volkova, S., Coppersmith, G., & Van Durme, B.	2014	Democrat, Republican	Twitter	Follower, Friend, Retweet, User Mentions, User Tweets	371	1031	NR	84.30-99.90					BC, B,	Conference	Annual Meeting of the Association for Computational Linguistics	A1	Volkova, S., Coppersmith, G., & Van Durme, B. (2014). Inferring User Political Preferences from Streaming Communications. In ACL (1) (pp. 186-196).
Wong, F. M. F., Tan, C. W., Sen, S., & Chiang, M.	2013	Continuous Variable (Left - Right)	Twitter	Language: Tweets		119000000	NR						NR	Conference	ICWSM	B1	Wong, F. M. F., Tan, C. W., Sen, S., & Chiang, M. (2013). Quantifying Political Leaning from Tweets and Retweets. ICWSM, 13, 640-649.
Wong, F. M. F., Tan, C. W., Sen, S., & Chiang, M.	2017	Conservative, Liberal	Twitter	Hashtags Retweets Tweets	232000	119000000	Conservative Hashtags: #EmptyChair, #LNYHBT, #military, #Mitt2002, #ObamaTax, #ObamaIsntWorking, #ocra, #sgp, #TCOT, #twisters Liberal Hashtags: #aca, #equality, #MarriageEquality, #Medicare, €p2b, #RomneyWrong, #PaulRyan, #YouPeople	31.00-94.00		0.96	00.00-00.42	00.00-00.97	NR	Conference	IEEE Knowledge and Data Engineering Exchange Workshop	C	Wong, F. M. F., Tan, C. W., Sen, S., & Chiang, M. (2016). Quantifying Political Leaning from Tweets, Retweets, and Retweeters. IEEE Transactions on Knowledge and Data Engineering, 28(8), 2158-2172.
Zhou, D. X., Resnick, P., & Mei, Q. (2011, July). Classifying the Political Leaning of News Articles and Users from User Votes. In ICWSM.	2011	Conservative, Liberal	Digg	Blogs		480932	NR	95.40-100.00			00.88-00.99	00.92-00.99	ARW, SVM	Conference	ICWSM	B1	Zhou, D. X., Resnick, P., & Mei, Q. (2011, July). Classifying the Political Leaning of News Articles and Users from User Votes. In ICWSM.
