# Supplementary material for: What demographic attributes do our digital footprints reveal? A systematic review
Source: PLoS One. 2018 Nov 28;13(11):e0207112. doi: 10.1371/journal.pone.0207112 (PMC6261568; doi:10.1371/journal.pone.0207112)
Supplement: S6 Table — (XLSX) [file pone.0207112.s006.xlsx]

## Sheet: Sexual Orientation
Authors	Year	Classes	Platform	Predictors/Features	No. Users	No. Digital Traces	Top Predictors	Accuracy %	AUC	F-score	Precision	Recall	Classifiers/Methods Used	Article Type	Conference/Journal Title	Quality	Reference
Garcia, D.	2007	Bisexual Female, Bisexual Male, Heterosexual Female, HeteroSexual Male, Homosexual Female, Homosexual Male	Friendster	Gender, Relationship Status, Sexual Orientation	9300000		NR		00.48-00.95				NB	Journal	Science Advances	Q1	Garcia, D. (2017). Leaking privacy and shadow profiles in online social networks. Science advances, 3(8), e1701172.
Jernigan, C., & Mistree, B. F. T.	2009	Bisexual Female, Bisexual Male, Heterosexual Female, HeteroSexual Male, Homosexual Female, Homosexual Male	Facebook	Friendship Links	4080		NR		0.75				Log-R	Journal	First Monday	Q2	Jernigan, C., & Mistree, B. F. T. (2009). Gaydar: Facebook friendships expose sexual orientation. First Monday, 14(10). https://doi.org/10.5210/m.v14i10.2611
Kosinski, M., Stillwell, D., & Graepel, T.	2013	Gay: Yes, No, Lesbian: Yes, No	Facebook	Likes	NR		Heterosexual Males: Foot Locker, Inbox 1 makes me nervous, Inbox 1 makes me nervous Homosexual Females: Gay Marriage, Human Rights Campaign, Not Being Pregnant, Tegan and Sara, The L Word		00.88 Gay 00.75 Lesbian				Log-R	Journal	PNAS	Q1	Kosinski, M., Stillwell, D., & Graepel, T. (2013). Private traits and attributes are predictable from digital records of human behavior. Proceedings of the National Academy of Sciences of the United States of America, 110(15), 5802–5. https://doi.org/10.1073/pnas.1218772110
Sarigol, E., Garcia, D., & Schweitzer, F.	2014	Bisexual Female, Bisexual Male, Female Without Interest, Male Without Interest, Heterosexual Female, Heterosexual Male, Homosexual Female, Homosexual Male	Friendster	Network Features (Related to age, gender, relationship status, sexual orientation)		11074009	NR						RF	Conference	Conference on Online Social Networks	NR	Sarigol, E., Garcia, D., & Schweitzer, F. (2014, October). Online privacy as a collective phenomenon. In Proceedings of the second ACM conference on Online social networks (pp. 95-106). ACM.
Theodoridis, T., Papadopoulos, S., & Kompatsiaris, Y.	2015	Heterosexual, Homosexual	Facebook	Likes (myPersonality Dataset)	2412		NR		00.82-00.83				Log-R	Conference	International Conference of the World Wide Web	A/A1	Theodoridis, T., Papadopoulos, S., & Kompatsiaris, Y. (2015, May). Assessing the reliability of facebook user profiling. In Proceedings of the 24th International Conference on World Wide Web (pp. 129-130). ACM.
Wang, Y., & Kosinski, M.	2017	Gay, Heterosexual Male, Lesbian, Heterosexual Female	US Dating Websites	Images (Facial Features)	Study 1a: 3,947 (Gay Men) 3,947 (Heterosexual Men) 3,441 (Lesbian Women) 3,441 (Heterosexual Women)	Study 1a: 8,996 (Gay Men) 8,645 (Heterosexual Men) 7,457 (Lesbian Women) 10,228 (Heterosexual Women) Study 1b: 200 Study 5: 14,438 (Gay Men, myPersonality Dataset)	NR		00.81-00.91 Men (Study 1) 00.71-00.83 Women (Study 1) 00.57 Men (Study 2) 00.58 Women (Study 2) 00.66-00.75 Men (Study 3) 00.57-00.63 Women (Study 3) 00.61 Men (Study 4) 00.54 Women (Study 4) 00.53 Men (Study 5)				DNN, Log-R	Journal	Journal of Personality and Social Psychology	Q1	Wang, Y., & Kosinski, M. (2018). Deep neural networks are more accurate than humans at detecting sexual orientation from facial images. Journal of personality and social psychology, 114(2), 246.
Zhong, Y., Yuan, N. J., Zhong, W., Zhang, F., & Xie, X.	2015	Bisexuality, Heterosexuality, Male Homosexuality, Female Homosexuality	Sina Weibo	Check-ins	3354918	81781544	NR			00.45-00.52	00.45-00.52	00.45-00.51	MLog-R, MNN, PEN	Conference	International Conference on Web Search and Data Mining	B	Zhong, Y., Yuan, N. J., Zhong, W., Zhang, F., & Xie, X. (2015, February). You are where you go: Inferring demographic attributes from location check-ins. In Proceedings of the eighth ACM international conference on web search and data mining(pp. 295-304). ACM.
