# Supplementary material for: What demographic attributes do our digital footprints reveal? A systematic review
Source: PLoS One. 2018 Nov 28;13(11):e0207112. doi: 10.1371/journal.pone.0207112 (PMC6261568; doi:10.1371/journal.pone.0207112)
Supplement: S7 Table — (XLSX) [file pone.0207112.s007.xlsx]

## Sheet: Family and Relationships
Authors	Year	Predictors/Features	No. Users	No. Digital Traces	No. Users2	No. Digital Traces2	Top Predictors	Accuracy %	AUC	F-score	Precision	Recall	Classifiers/Methods Used	Article Type	Conference/Journal Title	Quality	Reference
Brdar, S., Culibrk, D., & Crnojevic, V.	2012	Marital Status: Divorced, In a relationship, Married/Living with Partner, Single No. People in Household	Smartphones	Accelerometer, Application, Bluetooth, Calendar, Call Log, Contacts, Distance Matrix, Events, GSM, Media Media Play, Sensor	80		NR	50.50-59.49		00.35-00.61 (In a relationship) 00.39-00.68 (Married or Living with partner) 00.36-00.50 (Divorced or Single)	00.40-00.65 (In a relationship) 00.54-00.64 (Married or Living with partner) 00.41-00.60 (Divorced or Single)	00.26-00.58 (In a relationship) 00.66-00.82 (Married or Living with partner) 00.27-00.46 (Divorced or Single)	KNN, RBFNN, RF	Conference	International Conference on Pervasive Computing	A/A2	Brdar, S., Culibrk, D., & Crnojevic, V. (2012, June). Demographic attributes prediction on the real-world mobile data. In Proc. Mobile Data Challenge by Nokia Workshop, in Conjunction with Int. Conf. on Pervasive Computing, Newcastle, UK.
Chaabane, A., Acs, G., & Kaafar, M. A.	2012	Relationship: Married, Single	Facebook	Likes	104,401 (PubProfiles Dataset) 494,392 (Raw Profiles Dataset) 4,012 (Volunteer Profiles Dataset)		NR	71.00 (PubProfiles Dataset) 70.50 (Volunteer Profiles Dataset)					LDA	Conference	Usenix Network and Distributed System Security Symposium	A/A1	Chaabane, A., Acs, G., & Kaafar, M. A. (2012, February). You are what you like! information leakage through users’ interests. In Proceedings of the 19th Annual Network & Distributed System Security Symposium (NDSS).
Garcia, D.	2017	Relationship: Domestic Partners, In a Relationship, It's Complicated, Married, Single	Friendster	Gender, Relationship Status, Sexual Orientation	9300000		NR		00.46-00.94				NB	Journal	Science Advances	Q1	Garcia, D. (2017). Leaking privacy and shadow profiles in online social networks. Science advances, 3(8), e1701172.
Ikeda, K., Hattori, G., Ono, C., Asoh, H., & Higashino, T.	2013	Marital Status: Married, Unmarried	Twitter	Tweets	100000		NR			00.76-00.84			SVM	Journal	Knowledge-Based Systems	Q1	Ikeda, K., Hattori, G., Ono, C., Asoh, H., & Higashino, T. (2013). Twitter user profiling based on text and community mining for market analysis. Knowledge-Based Systems, 51, 35-47.
Kosinski, M., Stillwell, D., & Graepel, T.	2013	Friendships (Integer) Parents Together at 21: Yes, No Relationship: In a relationship, Single	Facebook	Likes	17,601 (Friendships) 766 (Parents together at 21) 46,027 (Relationship status)		Relationship: In a relationship: Circle of moms, Huggies, Kids, Parents magazine, Tacori, Weight Watchers Single: Hunger Games, Ign.com, Kassem G, Sonny with a chance, Usain Bolt Parents separated at 21: No: Everytime i see you a voice in my head goes dooouuucccheee, Making dirty innuendos out of perfectly innocent things, Watching peoples lives fall apart via status updates and news feeds Yes: I…		00.60 Parents together at 21 00.67 Relationship				Log-R (Parents together, Relationship status), Lin-R (No. friends)	Journal	Proceedings of the National Academy of Sciences of the United States of America	Q1	Kosinski, M., Stillwell, D., & Graepel, T. (2013). Private traits and attributes are predictable from digital records of human behavior. Proceedings of the National Academy of Sciences of the United States of America, 110(15), 5802–5. https://doi.org/10.1073/pnas.1218772110
Li, J., Ritter, A., & Hovy, E. H.	2014	Spouse: No, Yes	Twitter	No. Users, No. Users Connected, No. Edges, Positive Entities, Positive Tweets, Average Positive Tweets Per User, Negative Entity, Negative Tweets	1636		NR			00.59-00.84 (Spouse)	00.52-00.90 (Spouse)	00.45-00.86 (Spouse)	NR	Conference	North American Association for Computational Linguistics	A/A1	Li, J., Ritter, A., & Hovy, E. H. (2014, June). Weakly Supervised User Profile Extraction from Twitter. In ACL (1) (pp. 165-174).
Malmi, E., & Weber, I.	2016	Married: Married, Single Children: 0, 1 Child or More	Smartphones	Application Data	3760		Children: NR Married: Class Dojo, Deer Hunter 2014, ESPN, Gospel Library, Pintrest, USAA Mobile, Walmart, Zillow real estate & rentals Single: OkCupid Dating, MeetMe, POF, Snapchat, SoundCloud, Tinder, Tumblr, Uber	63.50 Children 72.50 Married		00.69 (Children) 00.79 (Married)			Log-R	Conference	AAAI International Conference on Weblogs and Social Media	B1	Malmi, E., & Weber, I. (2016, February). You Are What Apps You Use: Demographic Prediction Based on User's Apps. In ICWSM (pp. 635-638).
Mo, K., Tan, B., Zhong, E., Yang, Q.	2012	Marital Status: (3 Classes NR), No. people in household: (Continuous Variable)	Smartphones	Acceleration, Applications, Bluetooth, Calendar, Call Logs, Contacts, Distance, GSM, Media, Media Play, Process, System, Visit, Wireless LAN	80		Marital: Frequently used applications at evening, No. places visited in the evening, Ratio of calls and messages No. people in household: time talking to closest mobile-number, time talking to closest telephone, the brands of devices connected to No. People: Time talking to closest mobile number, Time talking to closest telephone, The brands of devices connected to	53.16-78.48 Marital Status					GP, SVR, SVM (No. people in household) GBDT, J48, RF, SVM (Marital) J48, RF, GBDT, Log-R, SVM (Marital Status)	Conference	International Conference on Pervasive Computing	A/A2	Mo. K., Tan, B., Zhong, E., Yang, Q. Report of Task 3 : Your Phone Understands You. Mob Data Chall Work. 2012;
Murray, D., & Durrell, K.	2000	Children in the Home: Yes, No Marital Status: Married, Single	Web usage data	NR	83196		NR						LSA	Conference	Web Usage Analysis and User Profiling	B/C	Murray, D., & Durrell, K. (2000). Inferring demographic attributes of anonymous Internet users. In Web Usage Analysis and User Profiling (pp. 7-20). Springer Berlin Heidelberg.
Nadeem, S. M. S. J. T., & Weigle, M. C.	2012	Marital Status: Divorced, In a Relationship, Married or Living Together, Single No. People in Household (1, 2, 3, 4, 4+)	Smartphones	Accelerometer, Application, Bluetooth, Calendar, Call Log, GSM, Media, Media Play, System, Wireless LAN	80		NR	45.00-47.00 Marital Status 57.00-66.00 No. people in household					BAG, SVM	Journal	GeroScience	NR	Nadeem, S. M. S. J. T., & Weigle, M. C. (2012). Demographic prediction of mobile user from phone usage. Age, 1, 16-21.
Reinhardt, D., Engelmann, F., Moerov, A., & Hollick, M.	2015	Friends: Acquaintances, Coworkers, Family, Friends, University/Schoolmates	Smartphones	Calls Contact Names: Acquaintances, Co-workers, Family, Friends, University/Schoolmates) Emails MMS SMS	19	1,895 Contacts 56,680 Communication Items	Ave length of calls, Ave. length of emails, Ave no. calls per week, Maximum length of calls, Max no. calls per week, No. days called divided by days logged calls, Standard deviation of the no. calls per week, Total duration of calls, Total no. calls	20.70-86.80		00.07-00.93	00.40-00.92	00.26-00.94	C4.5, DT, NB, SVM	Conference	International Conference on Mobile and Ubiquitous Multimedia	B2	Reinhardt, D., Engelmann, F., Moerov, A., & Hollick, M. (2015, November). Show me your phone, I will tell you who your friends are: analyzing smartphone data to identify social relationships. In Proceedings of the 14th International Conference on Mobile and Ubiquitous Multimedia (pp. 75-83). ACM.
Seneviratne, S., Seneviratne, A., Mohapatra, P., & Mahanti, A.	2014	Parent (Child < 10): Yes, No Relationship: Yes, No	Smartphones	Application Data	8,653 (Appbrain) 841 (Appaware) 369 (Apptronomy)		NR						SVM	Newsletter	ACM SIGMOBILE Mobile Computing and Communications Review	NR	Seneviratne, S., Seneviratne, A., Mohapatra, P., & Mahanti, A. (2014). Predicting user traits from a snapshot of apps installed on a smartphone. Mobile Computing and Communications Review, 18(2), 1–8. https://doi.org/10.1145/2636242.2636244.
Solomon, A., Bar, A., Yanai, C., Shapira, B., & Rokach, L.	2018	Marital Status: Married, Single Children: No, Yes	Smartphones	GPS Sensor Data	45 (Sherlock Dataset)	6,219,330 (Sherlock Dataset)	NR	60.00-82.22 Marital Status 51.11-84.44 Children					Log-R, NB, DT, SVM, RF	Conference	Conference on User Modelling, Adaptation and Personalization	B1	Solomon, A., Bar, A., Yanai, C., Shapira, B., & Rokach, L. (2018, July). Predict Demographic Information Using Word2vec on Spatial Trajectories. In Proceedings of the 26th Conference on User Modeling, Adaptation and Personalization(pp. 331-339). ACM.
Theodoridis, T., Papadopoulos, S., & Kompatsiaris, Y.	2015	Marital Status: Married, Single	Facebook	Likes (myPersonality Dataset)	7732		NR		00.70-00.81				Log-R	Conference	International Conference of the World Wide Web	A/A1	Theodoridis, T., Papadopoulos, S., & Kompatsiaris, Y. (2015, May). Assessing the reliability of facebook user profiling. In Proceedings of the 24th International Conference on World Wide Web (pp. 129-130). ACM.
Volkova, S., & Bachrach, Y.	2015	Children: Kids, No Kids, Relationship	Twitter	Language: Lexical, Lexicon, Negation, Postags, Stylistic	123513	24919528	NR		00.72 Children 00.63 Relationship				Log-R	Journal	Cyberpsychology, Behaviour and Social Networking	Q1	Volkova, S., & Bachrach, Y. (2015). On Predicting Sociodemographic Traits and Emotions from Communications in Social Networks and Their Implications to Online Self-Disclosure. Cyberpsychology, Behavior and Social Networking, 18(12), 726–36. https://doi.org/10.1089/cyber.2014.0609
Volkova, S., Bachrach, Y., & Van Durme, B.	2016	Children: No, Yes Relationship: Relations, Single	Twitter	Content Featues (From tweets), Context Features (From user interests)	4129	825800	NR		00.58-00.72 Children 00.57-00.63 Relationship				Log-R	Conference	IEEE Second International Conference on Big Data Computing Service and Applications	NR	Volkova, S., Bachrach, Y., & Van Durme, B. (2016, March). Mining user interests to predict perceived psycho-demographic traits on Twitter. In Big Data Computing Service and Applications (BigDataService), 2016 IEEE Second International Conference on (pp. 36-43). IEEE.
Ying, J. J., Chang, Y., Huang, C., & Tseng, V. S.	2012	Marital Status: Divorced, In a Relationship, Married/Living with Partner, Single No. People in Household	Smartphones	Behavioural Features, Environment Features	80		NR	51.21-79.67 Marital Status 57.78-62.60 No. people in household					R, JRip, IBL, LMT, L, MCC, RT, SLog, SGD, SMO (Marital Status) Lin-R, MP, NB, SMO (No. people in household)	Conference	International Conference on Pervasive Computing	A/A2	Ying, J. J., Chang, Y., Huang, C., & Tseng, V. S. (2012). Demographic Prediction Based on User ’ s Mobile Behaviors. Nokia, 2012(1), 1–6.
Zhong, E., Tan, B., Mo, K., & Yang, Q.	2013	Marital Status: Divorced, In a Relationship, Married or Living Together, Single No. People in Household (1, 2, 3, 4, 4+)	Smartphones	Acceleration, Application, Bluetooth, Calendar, Call Logs, Contacts, Distance, GSM, Media, Media Play, Process, System, Visit, Wireless LAN	80		Marital: No. applications operated at 5.00pm, No. applications operated at 6.00pm, No. applications operated at 7.00pm No. People: Acceleration records at 6.00pm, No. visited places at 4.00pm, Usage frequency of the most used application	53.16-78.48 Marital Status					GBDT, J48, Log-R, RF, SVM (Marital Status) GP, SVM, SVR (No. people in household)	Journal	Pervasive and Mobile Computing	Q1	Zhong, E., Tan, B., Mo, K., & Yang, Q. (2013). User demographics prediction based on mobile data. Pervasive and Mobile Computing, 9(6), 823-837.
Zhong, Y., Yuan, N. J., Zhong, W., Zhang, F., & Xie, X.	2015	Marital Status: Single, Courtship (Seeking a Relationship), In Love, Married	Sina Weibo	Check-ins	3354918	81781544	NR			00.33-00.38	00.33-00.39	00.33-00.38	Log-R, MCNN, PEM	Conference	International Conference on Web Search and Data Mining	B	Zhong, Y., Yuan, N. J., Zhong, W., Zhang, F., & Xie, X. (2015, February). You are where you go: Inferring demographic attributes from location check-ins. In Proceedings of the eighth ACM international conference on web search and data mining(pp. 295-304). ACM.
