# Supplementary material for: What demographic attributes do our digital footprints reveal? A systematic review
Source: PLoS One. 2018 Nov 28;13(11):e0207112. doi: 10.1371/journal.pone.0207112 (PMC6261568; doi:10.1371/journal.pone.0207112)
Supplement: S8 Table — (XLSX) [file pone.0207112.s008.xlsx]

## Sheet: Ethnicity and race
Authors	Year	Classes	Platform	Predictors/Features	No. Users	No. Digital Traces	Top Predictors	Accuracy %	AUC	F-score	Precison	Recall	Classifiers/Methods Used	Article Type	Conference/Journal Title	Quality	Reference
Alharbi, A. R., & Thornton, M. A.	2015	China, English, Mexico, Pakistan, Palestine, United Arab Emirates, United States, Saudi Arabia	Tablets	Actions, Keystrokes, Timestamps	22	315470	NR	84.90-95.39					DT, J48, C4.5	Conference	IEEE, ICMLA - Machine Learning and Applications	B2/C	Alharbi, A. R., & Thornton, M. A. (2015, December). Demographic Group Classification of Smart Device Users. In Machine Learning and Applications (ICMLA), 2015 IEEE 14th International Conference on (pp. 481-486). IEEE.
Ambekar, A., Ward, C., Mohammed, J., Male, S., & Skiena, S.	2009	African, Asian, British, East Asian, East European, French, German, Greater European, Greater African, Greater East Asian, Hispanic, Indian Sub-Continent, Italian, Japanese, Jewish, Muslim, Nordic, Western European	News Corpus	Names	20000000		Most significant prefix/suffix rules for name ethnicity classification: EastAsian = Uan (suffix) EastEuropean = Ikov (suffix) IndianSubContinent = Bha (prefix) Singh (full) Japanese = Naka, Yama, Yoshi (prefix), Kawa, Mura (suffix) Muslim = Al (prefix) Nordic = Ensen (suffix)			00.36-00.95	00.34-00.96	00.33-00.93	HMM, DT	Conference	ACM SIGKDD Conference on Knowledge Discovery and Data Mining	A1	Ambekar, A., Ward, C., Mohammed, J., Male, S., & Skiena, S. (2009, June). Name-ethnicity classification from open sources. In Proceedings of the 15th ACM SIGKDD international conference on Knowledge Discovery and Data Mining (pp. 49-58). ACM.
Ardehaly, E. M., & Culotta, A.	2015	Asian, Black, Latino, White	Twitter	Language: Tweets	770	154000	NR	43.70-82.30					MLog-R	Conference	Conference of the North American Chapter of the Association for Computational Linguistics: Human Language Technologies	A1	Ardehaly, E. M., & Culotta, A. (2015). Inferring latent attributes of Twitter users with label regularization. North American Chapter of the Association of Computational Linguistics.
Ardehaly, E. M., & Culotta, A.	2017	Black, Hispanic, White	Twitter	Language: Tweets Profile Image	10500	2100000	NR			00.55-00.98			AO	Unpublished	Unpublished	NR	Ardehaly, E. M., & Culotta, A. (2017). Co-training for Demographic Classification Using Deep Learning from Label Proportions. arXiv preprint arXiv:1709.04108.
Ardehaly, E. M., & Culotta, A.	2017	Race: Non-White, White Nativity: Foreign Born, Native	Twitter	Language: Tweets		88000000	NR						WLR, RR	Technical Report	Technical Report	NR	Ardehaly, E. M., & Culotta, A. (2017). Mining the Demographics of Political Sentiment from Twitter Using Learning from Label Proportions. arXiv preprint arXiv:1708.08000.
Barberá, P.	2016	African-American, Hispanic/Latino, Asian/Other, White	Twitter	Language: Tweets, Emoticons, Twitter Handles	250000	1000000000	African American: black, smh, #scandal, lol, god, iamsteveharvey, bout, yall, man, morning, blessed, @BarackObama, @instagram,@KevinHart4real, @Oprah, @KingJames, @stephanasmith Hispanic/Latino: miami, lmao, colombia, que, en, #miami, fiu, lmfao, hola, el, fiu, cuban, @instagram, @nytimes, @JLo, @ladygaga, @SofiaVergara, @KimKaradashian, @sharkira Asian/Other: i'm, asian, miami, lol, jacksonville…	75.00-98.00			00.74-00.90	00.02-00.98	B	Working paper	NA	NA	Barberá, P. (2016). Less is more? How demographic sample weights can improve public opinion estimates based on Twitter data. Working Paper.
Bergsma, S., Dredze, M., Van Durme, B., Wilson, T., & Yarowsky, D.	2013	Origin: Indian, Non-Indian Ethnicity: 13 European languages e.g. German, Dutch, French, Swedish Race: Black, White	Twitter	First Names Last Names Locations	802000		NR	48.50-81.30 (Ethnicity) 80.40-84.60 (Race)					SVM	Conference	North American Association for Computational Linguistics	A/A1	Bergsma, S., Dredze, M., Van Durme, B., Wilson, T., & Yarowsky, D. (2013). Broadly Improving User Classification via Communication-Based Name and Location Clustering on Twitter. Hlt-Naacl, (June), 1010–1019.
Chang, J., Rosenn, I., Backstrom, L., & Marlow, C.	2010	Asian/Pacific Islander, Black, Hispanic, White	Facebook	Names	77954		NR						B	Conference	ICWSM	B1	Chang, J., Rosenn, I., Backstrom, L., & Marlow, C. (2010). ePluribus: Ethnicity on Social Networks. ICWSM, 10, 18-25.
Chen, X., Wang, Y., Agichtein, E., & Wang, F.	2015	Asian, Black, Caucasian, Hispanic	Twitter	Profile Data: Names, Profile Images, Self Descriptions, Social Network Data, Tweets	2000		NR	46.00-79.00	00.55-00.73		00.54-00.74	00.46-00.79	SVM	Conference	AAAI International Conference on Weblogs and Social Media	B1	Chen, X., Wang, Y., Agichtein, E., & Wang, F. (2015). A Comparative Study of Demographic Attribute Inference in Twitter. ICWSM, 15, 590-593.
Culotta, A., & Cutler, J.	2016	Asian, African American, Hispanic	Twitter, Quantcast	Language: Textual Content Social Network Data	1066		African American: Drake, iamdiddy, kendricklamar, KevinHart4real, Tip Asian: SFGate, SFist, SFWeekly, TechCrunch, WIRED Hispanic: kobebryant, Lakers, latimes, SFGate,Sfist			00.60-00.86			MENR, EN, RR	Paper Type	Article Type	Q2	Culotta, A., & Cutler, J. (2016). Predicting Twitter User Demographics using Distant Supervision from Website Traffic Data, 55, 389–408.
Goel, S., Hofman, J. M., & Sirer, M. I.	2012	Non-White, White	NR	Web Browsing Histories	250000		NR	82.00					SVM	Conference	AAAI International Conference on Weblogs and Social Media	B1	Goel, S., Hofman, J. M., & Sirer, M. I. (2012). Who Does What on the Web:A Large-scale Study of Browsing Behavior. International AAAI Conference on Weblogs and Social Media, 1–8.
Huang, W., Weber, I., & Vieweg, S.	2014	Indian Subcontinent, Non-Qatari Arab, Others, Qatari, Southeast Asia, Westerner	Twitter	Location Features, Time Zone, Language Feautes, Hashtags, Profile Features, Name, Ethnicity, UTF-8 Charset Type, Tweet Source, Mentioned Users	5572765	35780	Hashtags Language-related Features Location-related Features Mentioned Users Name Ethnicity Profile Picture Features Time Zone UTF-8 Charset Type	83.80		00.76 (Indian Subcontinent) 00.77 (Non-Qatari Arab) 00.54 (Others) 00.91 F1 Qatari 00.92 F1 Southeast Asia 00.71 F1 Westener 00.20 F1 Unclear 00.82 Precision Indian Subcontinent 00.83 Precision Non-Qatari Arab 00.79 Precision Others 00.87 Precision Qatari 00.94 Precision Southeast Asia 00.71 Precision Westener 00.31 Precision Unclear 00.71 Recall Indian Subcontinent 00.71 Recall Non-Qatari Arab 0…			GBDT	Conference	Hypertext and Social Media	A	Huang, W., Weber, I., & Vieweg, S. (2014, September). Inferring nationalities of Twitter users and studying inter-national linking. In Proceedings of the 25th ACM conference on Hypertext and social media (pp. 237-242). ACM.
Kosinski, M., Stillwell, D., & Graepel, T.	2013	African-American, White American	Facebook	Likes	7000		African-American: Erykah Badu, Maxwell, Madea, Next Friday White American: Bret Michaels, David Bowie Official, Fly the American Flag, Halloween						Log-R	Journal	PNAS	Q1	Kosinski, M., Stillwell, D., & Graepel, T. (2013). Private traits and attributes are predictable from digital records of human behavior. Proceedings of the National Academy of Sciences of the United States of America, 110(15), 5802–5. https://doi.org/10.1073/pnas.1218772110
Krismayer, T., Schedl, M., Knees, P., & Rabiser, R.	2017	Nationality (144 countries - most popular - Brazil, Germany, Great Britain, Poland, USA, Russian, The Netherlands)	Last.fm	Profile Information, Listening Habits	6698		NR	57.39-69.37					SVM, SMO, BLog-R, SLog-R, NB, DMNB	Conference	International Workshop on Content-Based Multimedia Indexing	B3	Krismayer, T., Schedl, M., Knees, P., & Rabiser, R. (2017, June). Prediction of User Demographics from Music Listening Habits. In Proceedings of the 15th International Workshop on Content-Based Multimedia Indexing (p. 8). ACM.
Malmi, E., & Weber, I.	2016	Non-White, Non-White	Smartphones	Applications	3760		NR	72.70	00.80-00.83				Log-R	Conference	ICWSM	B1	Malmi, E., & Weber, I. (2016, February). You Are What Apps You Use: Demographic Prediction Based on User's Apps. In ICWSM (pp. 635-638).
Mohammady, E., & Culotta, A.	2014	Asian, Black, Latino, White	Twitter	Language	839,000 (County Data) 100 (Census Data) 770 (Validation Manually Annotated Profiles)		Black: african, american, black, male, man, niggas, rip, smh, to, woman, yall, young White: boy, british, buying, christmas, french, fuckin, german, girl, irish, italian, own, pretty, russian Latino: de, el, en, es, hispanic, la, latin, latino, por, que, spanish Asian: asian, asiana, chinese, filipino, japan, japanese, korean, many, philippines, vietnamese Black (uniform dataset): ain, been, blac…	45.19-82.21		00.32-00.81	00.48-00.83		Log-R	Conference	Association of Computational Linguistics	A	Mohammady, E., & Culotta, A. (2014). Using county demographics to infer attributes of twitter users. ACL 2014, 7.
Oktay, H., Firat, A., & Ertem, Z.	2014	Asian, Black, Hispanic, White	Twitter	First Names	178,143 Tweets		NR						B	Technical Report	Technical Report	NR	Oktay, H., Firat, A., & Ertem, Z. (2014). Demographic breakdown of Twitter users: An analysis based on names. Academy of Science and Engineering (ASE) .
Pennacchiotti, M., & Popescu, A. M.	2011	African-American, Non-African-American	Twitter	Language: Prototypical Words, Prototypical Hashtags, Generic LDA, Domain Specific LDA, Sentiment Words	6000		iPhone, Starbucks, Star-bucks, Replies = GoldenMiley, Heyitsmimila, Aerocles, GoodCharlotte, Retweets = TheBieberFun, Nordstrom, Starbucks, Orbitz, WholeFoods			00.57-00.66	00.53-00.88	00.09-00.67	GDBT	Conference	ICWSM	B1	Pennacchiotti, M., & Popescu, A. M. (2011). A Machine Learning Approach to Twitter User Classification. Icwsm, 11(1), 281-288.
Rao, D., Paul, M. J., Fink, C., Yarowsky, D., Oates, T., & Coppersmith, G.	2011	Nigerian Ethnicities: Benin Edo, Efik Ibibio, Igbo, Yoruba	Facebook	Socio-linguistic Features (e.g. Agreement, Disflencies, Ellipses, Excitement, OMG, Puzzled Punctuation, Repeated Alphabets, Smileys) Name Features Content ngram Features	23858	119523	NR	38.40-81.10					AO, SVM, NB	Conference	ACM International Conference on Information and Knowledge Management	A/A1	Rao, D., Paul, M. J., Fink, C., Yarowsky, D., Oates, T., & Coppersmith, G. (2011). Hierarchical Bayesian Models for Latent Attribute Detection in Social Media. Icwsm, 11, 598–601.
Volkova, S., & Bachrach, Y.	2015	African American, Caucasian	Twitter	Language: Lexical, Lexicon, Negation, Postags, Stylistic	123513	24919528	NR		00.93				Log-R	Journal	Cyberpsychology, Behaviour and Social Networking	Q1	Volkova, S., & Bachrach, Y. (2015). On Predicting Sociodemographic Traits and Emotions from Communications in Social Networks and Their Implications to Online Self-Disclosure. Cyberpsychology, Behavior and Social Networking, 18(12), 726–36. https://doi.org/10.1089/cyber.2014.0609
