# Supplementary material for: What demographic attributes do our digital footprints reveal? A systematic review
Source: PLoS One. 2018 Nov 28;13(11):e0207112. doi: 10.1371/journal.pone.0207112 (PMC6261568; doi:10.1371/journal.pone.0207112)
Supplement: S9 Table — (XLSX) [file pone.0207112.s009.xlsx]

## Sheet: Education
Authors	Year	Classes	Platform	Predictors/Features	No. Users	No. Digital Traces	Top Predictors	Accuracy %	AUC	F-score	Precision	Recall	Classifiers/Methods Used	Article Type	Conference/Journal Title	Quality	Reference	Column2	Column3	Column4	Column5	Column6
Ardehaly, E. M., & Culotta, A.	2017	College Graduate, Non-College Graduate	Twitter	Language: Tweets		88000000	NR						RR	Technical Report	Technical Report	NR	Ardehaly, E. M., & Culotta, A. (2017). Mining the Demographics of Political Sentiment from Twitter Using Learning from Label Proportions. arXiv preprint arXiv:1708.08000.
Culotta, A., & Cutler, J.	2016	College, Grad School, No College	Twitter, Quantcast	Language: Textual Content Social Network Data	1066		College: azizansari, ConanOBrien, danieltosh, louisck, WIRED Grad School: New Yorker, nytimes, TheEconomist, WSJ, washingtonpost No College: katyperry, KevinHart4real, PlayStation, RockstarGames, YouTube						EN, MENR, RR	Journal	Journal of Artifical Intelligence Research	A	Culotta, A., & Cutler, J. (2016). Predicting Twitter User Demographics using Distant Supervision from Website Traffic Data, 55, 389–408.
De Bock, K., & Van den Poel, D.	2010	College, Lower High School, High School, High School, None/Primary School, University	Belgian Websites	Website Features Time/Day Features	4,338, (Survey 1) 5,719 (Survey 2)		NR	29.11-39.42	00.57-00.82				AB, BAG, C4.5, CART, NC, RF	Journal	Fundamenta Informaticae	Q3	De Bock, K., & Van den Poel, D. (2010). Predicting website audience demographics forweb advertising targeting using multi-website clickstream data. Fundamenta Informaticae, 98(1), 49-70.
Estival, D.	2008	NR	Email	Language: Character, Linguistic	1,030 (Arabic) 1,033 (English)	8,028 (Arabic) 9,836 (English)	NR	93.66 (Arabic) 79.92 (English)					ABM1, BAG, J48, JRip, IBL, SVM, RF, SMO	Journal	Journal of Science	NR	Estival, D. (2008). Author attribution with email messages. Journal of Science, Vietnam National University, 1, 1-9.
Estival, D., Gaustad, T., Pham, S. B., Radford, W., & Hutchinson, B.	2007	No Tertiary Education, Some Tertiary Education	Email	Language: Character, Lexical, Structural	1033	9836	NR	79.92					ABM1, BAG, J48, JRip, IBL, SVM, RF, SMO	Conference	Conference of the Pacific Association for Computational Linguistics	B	Estival, D., Gaustad, T., Pham, S. B., Radford, W., & Hutchinson, B. (2007). Author profiling for English emails. In Proceedings of the 10th Conference of the Pacific Association for Computational Linguistics (pp. 263-272).
Estival, D., Gaustad, T., Pham, S. B., Radford, W., & Hutchinson, B.	2007	No Tertiary Education, Some Tertiary Education	Email	Language (TAT Project): Language Named Entities (e.g. URLs, Arabic Character Features, Arabic Morpholgy Features), Arabic Lexicon, Word Features)	1,030 (Arabic) 1,033 (English)	8,028 (Arabic) 9,836 (English)	NR	93.66 (Arabic) 79.92 (English)					ABM1, BAG, J48, JRip, IBL, SVM, RF, SMO	Conference	Australasian Language Technology Association Workshop	B4	Estival, D., Gaustad, T., Pham, S. B., Radford, W., & Hutchinson, B. (2007). TAT: an author profiling tool with application to Arabic emails. In Proceedings of the Australasian Language Technology Workshop (pp. 21-30).
Estival, D., Gaustad, T., Hutchinson, B., Pham, S., Radford, W.	2008	No Tertiary Education, Some Tertiary Education	Email	Language: Character, Lexical, Structural	1,030 (Arabic) 1,033 (English)		NR	93.66 (Arabic) 79.92 (English)					BAG, IBL, SVM, RF, SMO	Technical Report	Technical Report	NR	Estival, D., Gaustad, T., Hutchinson, B., Pham, S., Radford, W. (2008). Author Profiling for English and Arabic Emails.
Goel, S., Hofman, J. M., & Sirer, M. I.	2012	College, No College	NR	Web Browsing Histories	250000		NR	70.00					SVM	Conference	AAAI International Conference on Weblogs and Social Media	B1	Goel, S., Hofman, J. M., & Sirer, M. I. (2012). Who Does What on the Web:A Large-scale Study of Browsing Behavior. International AAAI Conference on Weblogs and Social Media, 1–8.
Li, J., Ritter, A., & Hovy, E. H.	2014	College, High School, University	Twitter	No. Users, No. Users Connected, No. Edges, Positive Entities, Positive Tweets, Ave. Positive Tweets Per User, Negative Entity, Negative Tweets	7208		NR			00.28-00.80	00.35-00.89	00.39-00.85	NR	Conference	North American Association for Computational Linguistics	A/A1	Li, J., Ritter, A., & Hovy, E. H. (2014, June). Weakly Supervised User Profile Extraction from Twitter. In ACL (1) (pp. 165-174).
Li, H., Zhu, H., & Ma, D.	2018	Bachelor, Master, Doctor	Wi-Fi Traffic	Wi-Fi Traffic	28158		NR	62.00-78.00		00.60-00.79	00.61-00.79	00.62-00.78	B, DT, KNN, Log-R, RF, SVM, XGB	Journal	IEEE Transactions on Mobile Computing	Q1	Li, H., Zhu, H., & Ma, D. (2018). Demographic Information Inference through Meta-Data Analysis of Wi-Fi Traffic. IEEE Transactions on Mobile Computing, (5), 1033-1047.
Mislove, A., Viswanath, B., Gummadi, K. P., & Druschel, P.	2010	Dormitory, Majors, Year of Matriculation	Facebook	Profile Data: High School, University, Employer, Interests, Location	4,000 (Dataset 1) 63,000 (Dataset 2) 1,220 (Undergraduates Dataset)		NR						AO, CA,	Conference	ACM International Conference on Web Search and Data Mining	B	Mislove, A., Viswanath, B., Gummadi, K. P., & Druschel, P. (2010, February). You are who you know: inferring user profiles in online social networks. In Proceedings of the third ACM international conference on Web search and data mining (pp. 251-260). ACM.
Moseley, N., Alm, C. O., & Rege, M.	2014	Associate Degree, Bachelors Degree, Currently in College, Doctoral Degree, High School, Masters Degree, Not Specified, Some College	Twitter	Language: Contraction, Drop Last Character, Drop Vowels, Repeat Letter, Single Character, Th to d, Word Begin, Word End, You to u	66	101496	NR						AAMA	Conference	International Conference on Research Challenges in Information Science	B/B4	Moseley, N., Alm, C. O., & Rege, M. (2014, May). User-annotated microtext data for modeling and analyzing users' sociolinguistic characteristics and age grading. In Research Challenges in Information Science (RCIS), 2014 IEEE Eighth International Conference on (pp. 1-6). IEEE.
Murray, D., & Durrell, K.	2000	No College, Some College	NR		83196		NR						LSA	Conference	Web Usage Analysis and User Profiling	B/C	Murray, D., & Durrell, K. (2000). Inferring demographic attributes of anonymous Internet users. In Web Usage Analysis and User Profiling (pp. 7-20). Springer Berlin Heidelberg.
Volkova, S., & Bachrach, Y.	2015	Degree, School	Twitter	Language: Lexical, Lexicon, Negation, Postags, Stylistic	123513	24919528	NR		0.77				Log-R	Journal	Cyberpsychology, Behaviour and Social Networking	Q1	Volkova, S., & Bachrach, Y. (2015). On Predicting Sociodemographic Traits and Emotions from Communications in Social Networks and Their Implications to Online Self-Disclosure. Cyberpsychology, Behavior and Social Networking, 18(12), 726–36. https://doi.org/10.1089/cyber.2014.0609
Volkova, S., Bachrach, Y., & Van Durme, B.	2016	Degree, School	Twitter	Language: Content Featues (From tweets), Context Features (Learned from user interests)	4129	825800	NR		00.70-00.77				Log-R	Conference	IEEE Second International Conference on Big Data Computing Service and Applications	NR	Volkova, S., Bachrach, Y., & Van Durme, B. (2016, March). Mining user interests to predict perceived psycho-demographic traits on Twitter. In Big Data Computing Service and Applications (BigDataService), 2016 IEEE Second International Conference on (pp. 36-43). IEEE.
Zhong, Y., Yuan, N. J., Zhong, W., Zhang, F., & Xie, X.	2015	University, Non-University	Sina Weibo	Check-ins	3354918	81781544	NR		00.77-00.90	00.73-00.88	00.74-00.88	00.72-00.88	Log-R, SVM, LM	Conference	International Conference on Web Search and Data Mining	B	Zhong, Y., Yuan, N. J., Zhong, W., Zhang, F., & Xie, X. (2015, February). You are where you go: Inferring demographic attributes from location check-ins. In Proceedings of the eighth ACM international conference on web search and data mining(pp. 295-304). ACM.
