# Supplementary material for: What demographic attributes do our digital footprints reveal? A systematic review
Source: PLoS One. 2018 Nov 28;13(11):e0207112. doi: 10.1371/journal.pone.0207112 (PMC6261568; doi:10.1371/journal.pone.0207112)
Supplement: S10 Table — (XLSX) [file pone.0207112.s010.xlsx]

## Sheet: Income
Authors	Year	Classes	Platform	Predictors/Features	No. Users	No. Digital Traces	Top Predictors	Accuracy %	AUC	F-score	Precision	Recall	Classifiers/Methods Used	Article Type	Conference/Journal Title	Quality	Reference
Aarthi, S., Bharanidharan, S., Saravanan, M., & Anand, V.	2011	Low, Medium, High	Smartphones	Ave. Call Duration, No. Messages Sent, Expenses, No. International Calls, Indegree, Outdegree, Netcalls, Net-degree, Others (NR)	NR		NR						C4.5, CART, SVM	Conference	IEEE Advances in Social Networks Analysis and Mining	B1	Aarthi, S., Bharanidharan, S., Saravanan, M., & Anand, V. (2011, July). Predicting customer demographics in a mobile social network. In Advances in Social Networks Analysis and Mining (ASONAM), 2011 International Conference on (pp. 553-554). IEEE.
Ardehaly, E. M., & Culotta, A.	2017	Under $50k, Over $50k	Twitter	Tweets		88000000	NR						RR, WLR	Technical Report	Technical Report	NR	Ardehaly, E. M., & Culotta, A. (2017). Mining the Demographics of Political Sentiment from Twitter Using Learning from Label Proportions. arXiv preprint arXiv:1708.08000.
Barberá, P.	2016	Low: Under $150,000, Middle: $150,000-$300,000, High: > $300,000	Twitter	Language: Tweets, Emoticons, Twitter Handles	250000	1000000000	fresno, sacramento, bakersfield, work, lol, spokane, watching, good, ass, follow, wwe, #raw, baby, @instagram, @WhiteHouse, @YouTube, @ArianaGrande, @tomhanks, @stephenasmith, @aliciakeys	50.00-73.00%			00.45-00.55	00.18-00.79	B	Working paper	NA	NA	Barberá, P. (2016). Less is more? How demographic sample weights can improve public opinion estimates based on Twitter data. Working Paper.
Fixman, M., Berenstein, A., Brea, J., Minnoni, M., & Sarraute, C.	2016	High, Low	Smartphones	Voice Calls, Text messages		29,599,762 Calls 5,476,783 Text Messages	NR	50.00-71.00	00.63-00.74				B	Conference	Simposio Argentino de GRANdes DAtos (AGRANDA 2016)-JAIIO	NR	Fixman, M., Berenstein, A., Brea, J., Minnoni, M., & Sarraute, C. (2016, November). Inference of Socioeconomic Status in a Communication Graph. In Simposio Argentino de GRANdes DAtos (AGRANDA 2016)-JAIIO 45 (Tres de Febrero, 2016).
Fixman, M., Berenstein, A., Brea, J., Minnoni, M., Travizano, M., & Sarraute, C.	2016	High, Low	Smartphones	Voice Calls, Text Messages		29,599,762 Calls 5,476,783 Text Messages	NR	50.00-71.00	00.63-00.74				B	Conference	International Conference on Advances in Social Network Analysis and Mining	B4	Fixman, M., Berenstein, A., Brea, J., Minnoni, M., Travizano, M., & Sarraute, C. (2016, August). A Bayesian approach to income inference in a communication network. In Advances in Social Networks Analysis and Mining (ASONAM), 2016 IEEE/ACM International Conference on (pp. 579-582). IEEE.
Fixman, M., Minnoni, M., & Sarraute, C.	2017	High, Low	Smartphones	Voice Calls, Text Messages		29,599,762 Calls 5,476,783 Text Messages	NR	53.40-71.40	00.54-00.75	00.31-00.72 F1 00.21-00.78 F4	00.53-00.75	00.20-00.83	B, Log-R, RF	Conference	Simposio Argentino de GRANdes DAtos (AGRANDA 2016)-JAIIO	NR	Fixman, M., Minnoni, M., & Sarraute, C. (2017). Comparison of Feature Extraction Methods and Predictors for Income Inference. In Simposio Argentino de GRANdes DAtos (AGRANDA)-JAIIO 46 (Córdoba, 2017).
Flekova, L., Ungar, L., & Preotiuc-Pietro, D.	2016	Continuous Variable	Twitter	Tweet Length (Words, Characters), Word Length, Readability, Syntax, Style	5191	10796836	NR						Lin-R, SVR	Conference	Association of Computational Linguistics	A	Flekova, L., Ungar, L., & Preotiuc-Pietro, D. (2016, August). Exploring stylistic variation with age and income on twitter. In Proceedings of the 54th Annual Meeting of the Association for Computational Linguistics, ACL (pp. 313-319).
Goel, S., Hofman, J. M., & Sirer, M. I.	2012	Over $50k, Under $50k	NR	Web Browsing Histories		250000	NR	68.00					SVM	Conference	AAAI International Conference on Weblogs and Social Media	B1	Goel, S., Hofman, J. M., & Sirer, M. I. (2012). Who Does What on the Web:A Large-scale Study of Browsing Behavior. International AAAI Conference on Weblogs and Social Media, 1–8.
Malmi, E., & Weber, I.	2016	Over $40k, Under $40k	Smartphones	Applications	3760		Income > 40K = Fitbit, LinkedIn, com.ws.dm, LG Android Quick Memo+, Redbox, Like Parent, Peel Smart Remote, Yelp < 40K = Job search, Security policy updates, Solitaire, Prize claw 2, ScreenPay - Get paid to unlock, Meetme, Foursquare, Microsoft Word	60.30	0.75				Log-R	Conference	ICWSM	B1	Malmi, E., & Weber, I. (2016, February). You Are What Apps You Use: Demographic Prediction Based on User's Apps. In ICWSM (pp. 635-638).
Murray, D., & Durrell, K.	2000	Over $50k, Under $50k	Web usage data	NR	83196	83196	NR						LSA	Conference	Web Usage Analysis and User Profiling	B/C	Murray, D., & Durrell, K. (2000). Inferring demographic attributes of anonymous Internet users. In Web Usage Analysis and User Profiling (pp. 7-20). Springer Berlin Heidelberg.
Preoţiuc-Pietro, D., Volkeva, S., Lampos, V., Bachrach, Y., & Aletras, N.	2015	UK SOC Hierarchy	Twitter	Profile Features, Inferred Perceived Psycho-demographic Features, Textual Features		10796836	Politics, NGOs, Web analytics/Surveys, Corporate, Justice, Link words, Beauty, Sport shows, Swearing						GP	Journal	Plos One	Q1	Preoţiuc-Pietro, D., Volkeva, S., Lampos, V., Bachrach, Y., & Aletras, N. (2015). Studying user income through language, behaviour and affect in social media. PLoS ONE, 10(9), 1–17. https://doi.org/10.1371/journal.pone.0138717
Volkova, S., & Bachrach, Y.	2015	Over $35k, Under $35k	Twitter	Lexical, Stylistic, Negation, Lexicon, Postags	123513	24919528	NR						Log-R	Journal	Cyberpsychology, Behaviour and Social Networking	Q1	Volkova, S., & Bachrach, Y. (2015). On Predicting Sociodemographic Traits and Emotions from Communications in Social Networks and Their Implications to Online Self-Disclosure. Cyberpsychology, Behavior and Social Networking, 18(12), 726–36. https://doi.org/10.1089/cyber.2014.0609
Volkova, S., Bachrach, Y., & Van Durme, B.	2016	Over $35k, Under $35k	Twitter	Context Features (Learned from user interests), Content Features	4129	825800	NR						Log-R	Conference	IEEE Second International Conference on Big Data Computing Service and Applications	NR	Volkova, S., Bachrach, Y., & Van Durme, B. (2016, March). Mining user interests to predict perceived psycho-demographic traits on Twitter. In Big Data Computing Service and Applications (BigDataService), 2016 IEEE Second International Conference on (pp. 36-43). IEEE.
