# Supplementary material for: What demographic attributes do our digital footprints reveal? A systematic review
Source: PLoS One. 2018 Nov 28;13(11):e0207112. doi: 10.1371/journal.pone.0207112 (PMC6261568; doi:10.1371/journal.pone.0207112)
Supplement: S11 Table — (XLSX) [file pone.0207112.s011.xlsx]

## Sheet: Language
Authors	Year	Classes	Platform	Predictors/Features	No. User	No. Digtal Traces	Top Predictors	Accuracy %	AUC	F-score	Precision	Recall	Classifiers/Methods Used	Article Type	Conference/Journal Title	Quality	Reference
Alharbi, A. R., & Thornton, M. A.	2015	NR	Tablets	Actions, Keystrokes, Timestamps	22	315470	NR	94.22-97.79					C4.5, J48	Conference	IEEE, ICMLA - Machine Learning and Applications	B2/C	Alharbi, A. R., & Thornton, M. A. (2015, December). Demographic Group Classification of Smart Device Users. In Machine Learning and Applications (ICMLA), 2015 IEEE 14th International Conference on (pp. 481-486). IEEE.
Argamon, S., Koppel, M., Pennebaker, J., & Schler, J.	2009	Bulgarian, Czech, French, Russian, Spanish	Blogs: blogger.com	Language: Content, Stylistic	19320		Bulgarian Content: bulgaria, bulgarian, imaginiation, theoretical, university Bulgarian Stylistic: and, conjunction-extension, however, pronoun-conscious, pronoun-interactant Czech Content: able, care, czech, republic, started Czech Stylistic: did, not, personal pronoun, usually, very French Content: europe, european, gap, identity, nation French Style: auxverb-future, auxverb-probability, conjun…	65.10-82.30					BM Log-R	Journal	Communications of the ACM	Q1	Argamon, S., Koppel, M., Pennebaker, J., & Schler, J. (2009). Automatically Profiling the Author of an Anonymous Text. Communications of the ACM, 52(2), 119–123. https://doi.org/10.1145/1461928.1461959
Bergsma, S., Dredze, M., Van Durme, B., Wilson, T., & Yarowsky, D.	2013	Arabic, Farsi, Urdu (written in Arabic) Hindi, Nepali, Marathi (written in Devangari) Russian, Bulgarian, Ukranian (written in Cryillic)	Twitter	First Names Last Names Location	802000		NR	82.70					SVM	Conference	North American Association for Computational Linguistics	A/A1	Bergsma, S., Dredze, M., Van Durme, B., Wilson, T., & Yarowsky, D. (2013). Broadly Improving User Classification via Communication-Based Name and Location Clustering on Twitter. Hlt-Naacl, (June), 1010–1019.
de Vel, O. Y., Corney, M. W., Anderson, A. M., & Mohay, G. M. (2002).	2002	English as a first language, English as a second language	Email	Language: Gender-preferential Language Features, Structural, Stylistic	4932		NR			00.60-00.81			SVM	Conference	Digital Forensics Research Workshop	NR	de Vel, O. Y., Corney, M. W., Anderson, A. M., & Mohay, G. M. (2002). Language and gender author cohort analysis of e-mail for computer forensics. In Proceedings Digital Forensics Research Workshop (pp. 1–16).
Estival, D.	2008	Native Language (English, Non-English)	Email	Language: Character, Linguistic	1,033 (English) 1,030 (Arabic)	9,836 (English) 8,028 (Arabic)	NR	84.22 (English)					ABM1, BAG, J48, JRip, IBL, RF, SVM	Journal	Journal of Science	NR	Estival, D. (2008). Author attribution with email messages. Journal of Science, Vietnam National University, 1, 1-9.
Estival, D., Gaustad, T., Pham, S. B., Radford, W., & Hutchinson, B.	2007	Native Language (English, Arabic, Spanish)	Email	Language: Character, Lexical, Structural	1,033 (English)	9,836 (English)	NR	84.22					ABM1, BAG, J48, JRip, IBL, RF, SVM	Conference	Conference of the Pacific Association for Computational Linguistics	B	Estival, D., Gaustad, T., Pham, S. B., Radford, W., & Hutchinson, B. (2007). Author profiling for English emails. In Proceedings of the 10th Conference of the Pacific Association for Computational Linguistics (pp. 263-272).
Seneviratne, S., Seneviratne, A., Mohapatra, P., & Mahanti, A.	2014	Language (English, Non-English mother tongue)	Smartphones	Application Data	8,653 (Appbrain) 841 (Appaware) 369 (Apptronomy)		NR				00.62-00.82	00.19-00.33	NR	Newsletter	ACM SIGMOBILE Mobile Computing and Communications Review	NR	Seneviratne, S., Seneviratne, A., Mohapatra, P., & Mahanti, A. (2014). Predicting user traits from a snapshot of apps installed on a smartphone. Mobile Computing and Communications Review, 18(2), 1–8. https://doi.org/10.1145/2636242.2636244.
Sloan, L., Morgan, J., Housley, W., Williams, M., Edwards, A., Burnap, P., & Rana, O.	2014	53 Languages	Twitter	Tweets	13260819	113828224	NR						NR	Journal	Sociological Research Online	Q2	Sloan, L., Morgan, J., Housley, W., Williams, M., Edwards, A., Burnap, P., & Rana, O. (2013). Knowing the tweeters: Deriving sociologically relevant demographics from Twitter. Sociological research online, 18(3), 1-11.
Sloan, L., & Morgan, J.	2015	Languages	Twitter	Tweets	30,030,446 (Dataset 1) 23,789,264 (Dataset 2)		NR						NR	Journal	Plos One	Q1	Sloan, L., & Morgan, J. (2015). Who tweets with their location? Understanding the relationship between demographic characteristics and the use of geoservices and geotagging on Twitter. PloS one, 10(11), e0142209.
