# Supplementary material for: What demographic attributes do our digital footprints reveal? A systematic review
Source: PLoS One. 2018 Nov 28;13(11):e0207112. doi: 10.1371/journal.pone.0207112 (PMC6261568; doi:10.1371/journal.pone.0207112)
Supplement: S12 Table — (XLSX) [file pone.0207112.s012.xlsx]

## Sheet: Religion
Authors	Year	Classes	Platform	Predictors/Features	No. Users	No. Digital Traces	Top Predictors	Accuracy %	AUC	F-score	Precision	Recall	Classifiers/Methods Used	Article Type	Conference/Journal Title	Quality	Reference
Bi, B., Shokouhi, M., Kosinski, M., & Graepel, T.	2013	Agnostic, Buddhist, Christian, Jewish	Bing	Facebook Likes, Profile Data (myPersonality Dataset), Search Queries (Bing)	457,000 (myPersonality Dataset) 3,300,000 (Bing Queries)	122,000 (myPersonality Dataset) 133,000,000 (Bing Dataset)			0.76				Log-R L2	Conference	International Conference of the World Wide Web	A/A1	Bi, B., Shokouhi, M., Kosinski, M., & Graepel, T. Inferring the Demographics of Search Users. In Proceedings of Proceedings of the 22nd international conference on World Wide Web (pp. 131-140). https://doi.org/10.1145/1835449.1835537
Jurgens, D., Tsvetkov, Y., & Jurafsky, D.	2017	Aethist, Christian	Twitter	Language: Content, Styistic		19940	Atheist: atheist, atheism, atheists, evidence, evolution, fuck, fucking, science, shit Christian: amen, america, bless, catholic, christian, church, deplorable, obama, pjnet, profile, trump Characteristic cues used by people to signal their own attributes: Christian - words from a particular religious affiliation. Atheist - More words from scientific and political topics	74.40		00.26-00.36 Macro F1 00.72-00.79 Micro F1			RF	Conference	International Workshop on Social Informatics	B4	Jurgens, D., Tsvetkov, Y., & Jurafsky, D. (2017, September). Writer Profiling Without the Writer’s Text. In International Conference on Social Informatics (pp. 537-558). Springer, Cham.
Kosinski, M., Stillwell, D., & Graepel, T.	2013	Christian, Muslim	Facebook	Likes	18833		Christian: Jesus Daily, I'm Proud To Be Christian, Church, The Holy Bible, Christian Music, Gospel Music Muslim: Nancy Ajram, Moozlum The Movie, Desihits.Com, Prophet Muhammad Saw The Greatest Man In History, remove Group Fuck Islam From Facebook		00.82				Log-R	Journal	PNAS	Q1	Kosinski, M., Stillwell, D., & Graepel, T. (2013). Private traits and attributes are predictable from digital records of human behavior. Proceedings of the National Academy of Sciences of the United States of America, 110(15), 5802–5. https://doi.org/10.1073/pnas.1218772110
Nguyen, M. T., & Lim, E. P.	2014	Christian, Muslim	Twitter	Profiles, Tweets, Follow Links	111767	1770272	Christian: amen, bible, hillsong, christ, church, corinthians, gospel, proverbs, psalm, testimony Muslim: allah, awak, insya, insyaallah, masjid, terawih, pakai, pasal, pulak, quran			00.81-00.91 (Chrisitan) 00.59-00.88 (Muslim)	00.69-00.85 (Christian) 00.81-00.96 (Muslim)	00.88-00.99 (Christian) 00.43-00.86 (Muslim)	SVM	Conference	SIGIR conference on Research & development in information retrieval	A1	Nguyen, M. T., & Lim, E. P. (2014, July). On predicting religion labels in microblogging networks. In Proceedings of the 37th international ACM SIGIR conference on Research & development in information retrieval (pp. 1211-1214). ACM.
Seneviratne, S., Seneviratne, A., Mohapatra, P., & Mahanti, A.	2014	Buddhism, Christianity, Hinduism, Islam	Smartphones	Application Data	8,653 (Appbrain) 841 (Appaware) 369 (Apptronomy)		NR			00.90-1.00 Precision 00.03-00.24 Recall			SVM	Newsletter	ACM SIGMOBILE Mobile Computing and Communications Review	NR	Seneviratne, S., Seneviratne, A., Mohapatra, P., & Mahanti, A. (2014). Predicting user traits from a snapshot of apps installed on a smartphone. Mobile Computing and Communications Review, 18(2), 1–8. https://doi.org/10.1145/2636242.2636244.
Theodoridis, T., Papadopoulos, S., & Kompatsiaris, Y.	2015	Christian, Muslim	Facebook	Likes	1196		NR		00.84-00.85				Log-R	Conference	International Conference of the World Wide Web	A/A1	Theodoridis, T., Papadopoulos, S., & Kompatsiaris, Y. (2015, May). Assessing the reliability of facebook user profiling. In Proceedings of the 24th International Conference on World Wide Web (pp. 129-130). ACM.
Volkova, S., Bachrach, Y., & Van Durme, B.	2015	Christian, Unaffiliated	Twitter	Language: Lexical, Lexicon, Negation, Postags, Stylistic	123513	24919528	NR		00.63				Log-R	Journal	Cyberpsychology, Behaviour and Social Networking	Q1	Volkova, S., Bachrach, Y., & Van Durme, B. (2016, March). Mining user interests to predict perceived psycho-demographic traits on Twitter. In Big Data Computing Service and Applications (BigDataService), 2016 IEEE Second International Conference on (pp. 36-43). IEEE.
Volkova, S., & Bachrach, Y.	2016	Christian, Unaffiliated	Twitter	Content (From tweets), Context (From user interests)	4129	825800			00.57-00.63				Log-R	Conference	IEEE Second International Conference on Big Data Computing Service and Applications	NR	Volkova, S., & Bachrach, Y. (2015). On Predicting Sociodemographic Traits and Emotions from Communications in Social Networks and Their Implications to Online Self-Disclosure. Cyberpsychology, Behavior and Social Networking, 18(12), 726–36. https://doi.org/10.1089/cyber.2014.0609
