# Supplementary material for: What demographic attributes do our digital footprints reveal? A systematic review
Source: PLoS One. 2018 Nov 28;13(11):e0207112. doi: 10.1371/journal.pone.0207112 (PMC6261568; doi:10.1371/journal.pone.0207112)
Supplement: S13 Table — (XLSX) [file pone.0207112.s013.xlsx]

## Sheet: Occupation
Authors	Year	Classes	Platform	Predictors/Features	No. Users	No. Digital Traces	Top Predictors	Accuracy %	AUC	F-score	Precision	Recall	Classifiers/Methods Used	Article Type	Conference/Journal Title	Quality	Reference
Akter, S., & Holder, L.	2017	Housewife, Not Currently Working, Other, Retired, Studying Full Time, Studying Part Time, Working Full Time, Working Part Time	Smartphones	Application Usage, Audio Environment, Comunication (Call and SMS Logs), Location (GPS, WLAN), Motion (Accelerometer), Multimedia (Camera, Media Player), Proximity (Bluetooth)	185		NR	53.85-76.92					SVM	Conference	ACM SIGMOD In Proceedings of the 2nd International Workshop on Network Data Analytics	A/A1	Akter, S., & Holder, L. (2017, May). Using Graphical Features To Improve Demographic Prediction From Smart Phone Data. In Proceedings of the 2nd International Workshop on Network Data Analytics (p. 5). ACM.
Brdar, S., Culibrk, D., & Crnojevic, V.	2012	Employee Exercising Executive Functions, Employee Without Executive Function, PhD Student, Training	Smartphones	Accelerometer Sensor, Application Events, Bluetooth, Calendar, Call Logs, Contacts, Distance Matrix, GSM, Media, Media Play	80		NR	30.56-40.28		00.00-00.22 (Employee exercising executive functions) 00.37-00.51 (Employee without executive function) 00.31-00.40 (PhD student)	00.00-00.25 (Employee exercising executive functions) 00.32-00.44 (Employee without executive function) 00.30-00.39 (PhD student)	00.00-20.00 (Employee exercising executive funtions) 00.41-00.62 (Employee without executive function) 00.33-00.46 (PhD student)	KNN, RBFN, RF	Conference	International Conference on Pervasive Computing	A/A2	Brdar, S., Culibrk, D., & Crnojevic, V. (2012, June). Demographic attributes prediction on the real-world mobile data. In Proc. Mobile Data Challenge by Nokia Workshop, in Conjunction with Int. Conf. on Pervasive Computing, Newcastle, UK.
De Bock, K., & Van den Poel, D.	2010	Blue Collar Worker, Farmer/ Craftsman/Small Business Owner, Housewife/Househusband, Middle management, Other/Inactive, Retired, Student, Top Management, Unemployed, White Collar Worker	Websites	Time/Day Features, Website	4,338 (Survey 1) 5,719 (Survey 2)		NR	27.66-42.25	00.59-00.70				AB, BAG, C4.5, CART, NC, RF	Journal	Fundamenta Informaticae	Q3	De Bock, K., & Van den Poel, D. (2010). Predicting website audience demographics forweb advertising targeting using multi-website clickstream data. Fundamenta Informaticae, 98(1), 49-70.
Dong Y, Tang J, Chawla N V., Lou T, Yang Y, Wang B.	2015	Social Status: Manager, Subordinate	Smartphones, Email	Voice Call, Short Messages, Email Network Structure	50 Managers, 182 Subordinates (Asian telecommunications company) 155 Managers, 22,322 Subordinates (Email communications from Enron Inc)		NR	67.96-85.08 (Calls) 78.50-92.76 (SMS) 84.83-93.83 (Emails)		00.69-00.85 (Call) 00.79-00.93 (SMS) 00.77-00.94 (Email)			NB, BN, Log-R, CRF	Journal	Plos One	Q1	Dong Y, Tang J, Chawla N V., Lou T, Yang Y, Wang B. Inferring social status and rich club effects in enterprise communication networks. PLoS One. 2015; doi:10.1371/journal.pone.0119446
Duong, D. T., Pham, S. B., & Tan, H.	2016	Business/Sale/Admin, Techical/Technology, Education/Healthcare	Forums (Vietnamese: Webtretho, Otofun, Tinhte)	Language: Character, Content, Stylometric, Syntactic, Word- based Features , syntactic, content		6831	NR	43.32-56.98					BN, J48, SVM	Journal	Recent Developments in Intelligent Information and Database Systems	Q4	Duong, D. T., Pham, S. B., & Tan, H. (2016). Using content-based features for author profiling of Vietnamese forum posts. In Recent Developments in Intelligent Information and Database Systems (pp. 287-296). Springer International Publishing.
Ikeda, K., Hattori, G., Ono, C., Asoh, H., & Higashino, T.	2013	Civil Servant, Employee, Homemaker, Self Employed, Part-time, Student, Without Occupation	Twitter	Tweets	100000		NR			00.54-00.80			SVM	Journal	Knowledge-Based Systems	Q1	Ikeda, K., Hattori, G., Ono, C., Asoh, H., & Higashino, T. (2013). Twitter user profiling based on text and community mining for market analysis. Knowledge-Based Systems, 51, 35-47.
Ito, J., Hoshide, T., Toda, H., Uchiyama, T., & Nishida, K.	2013	8 classes: Homemaker, Student, (Others NR)	Twitter	Profiles: No. Followers, Profile Documents Social Neighbours Tweeting Tendencies (No. Hashtags, URLs)	37,427 (Blogs Dataset) 41,920 (TwiBlo Dataset)		NR	36.10-48.72					AIC	Conference	International Conference on Advances in Social Network Analysis and Mining	B4	Ito, J., Hoshide, T., Toda, H., Uchiyama, T., & Nishida, K. (2013, August). What is he/she like?: Estimating twitter user attributes from contents and social neighbors. In Advances in Social Networks Analysis and Mining (ASONAM), 2013 IEEE/ACM International Conference on (pp. 1448-1450). IEEE.
Ito, J., Nishida, K., Hoshide, T., Toda, H., & Uchiyama, T.	2014	Company Employee, Government Employee, Graduate/Undergraduate Student, Housewife, Job-hopping Part Time Worker, Middle/High School Student, Other, Self-employed	Blogs, Twitter	Description, Location, No. Tweets, Website URL	65,873 (Blogs Dataset) 86,183 (TwiBlo Dataset)		NR	36.10-62.29					Log-R	Book	Online Social Media Analysis and Visualization	NR	Ito, J., Nishida, K., Hoshide, T., Toda, H., & Uchiyama, T. (2014). Demographic and Psychographic Estimation of Twitter Users Using Social Structures. In Online Social Media Analysis and Visualization (pp. 27-46). Springer International Publishing.
Kelly, D., Smyth, B., & Caulfield, B.	2013	Full Time Employed, Other	Smartphones	Location Data	29		NR	86.20					DT, D-Table, SVM, NN, NB, BN	Journal	IEEE Transactions on Human-Machine Systems	Q1/Q2	Kelly, D., Smyth, B., & Caulfield, B. (2013). Uncovering measurements of social and demographic behavior from smartphone location data. IEEE Transactions on Human-Machine Systems, 43(2), 188-198.
Li, J., Ritter, A., & Hovy, E. H.	2014	Education, Occupation (NR), Relationship	Twitter	Average Positive Tweets Per User, Negative Entity, Negative Tweets, No. Edges, No. Users, No. Users Connected, Positive Entities, Positive Tweets	1806		NR			00.02-00.78	00.01-00.89	00.30-00.70	NR	Conference	North American Association for Computational Linguistics	A/A1	Li, J., Ritter, A., & Hovy, E. H. (2014, June). Weakly Supervised User Profile Extraction from Twitter. In ACL (1) (pp. 165-174).
Mo, K., Tan, B., Zhong, E., Yang, Q.	2012	NR	Smartphones	Acceleration, Applications, Bluetooth, Calendar, Call Logs, Contacts, Distance, GSM, Media, Mediaplay, Process, System, Wireless LAN, Visit	80		Chance of being at home at night, Chance of calling/answering at night, Time spent at work place at weekend	39.72-78.08					GBDT, J48, Log-R, RF, SVM	Conference	International Conference on Pervasive Computing	A/A2	Mo K, Tan B, Zhong E, Yang Q. Report of Task 3 : Your Phone Understands You. Mob Data Chall Work. 2012;
Nadeem, S. M. S. J. T., & Weigle, M. C.	2012	Employee Without Executive Function, PhD Student, Training	Smartphones	Accelerometer, Application, Bluetooth, Calendar, Call Logs, GSM, Media, Media Play, System, Wireless LAN	80		NR	47.00-52.00					BAG, SVM	Journal	GeroScience	NR	Nadeem, S. M. S. J. T., & Weigle, M. C. (2012). Demographic prediction of mobile user from phone usage. Age, 1, 16-21.
Pham, D. D., Tran, G. B., & Pham, S. B.	2009	Model, Singer, Student	Blogs (Vietnamese)	Language: Character, Content, Function Words, Lexicon, Line-based, Paragraph, Part-of-Speech, Structural, Word-based Features	73		NR	55.73-82.21					BAG, BN, J48, IBL, MP, NB, RT, RF, SMO	Conference	International Conference on Asian Language Processing	NR	Pham, D. D., Tran, G. B., & Pham, S. B. (2009, December). Author profiling for Vietnamese blogs. In Asian Language Processing, 2009. IALP'09. International Conference on (pp. 190-194). IEEE.
Preotiuc-Pietro, D., Xu, W., & Ungar, L. H.	2016	Occupational Class: High, Low	Twitter	Language: Paraphrases	5191	10796836	NR		00.70-00.87				NB	Conference	Conference on Artificial Intelligence	A/A1	Preotiuc-Pietro, D., Xu, W., & Ungar, L. H. (2016, February). Discovering User Attribute Stylistic Differences via Paraphrasing. In AAAI (pp. 3030-3037).
Preoţiuc-Pietro, D., Lampos, V., & Aletras, N.	2015	Managers/Directors/Senior Officials, Professional Occupations, Associate Professional/Technical Occupations, Administrative/Secretarial Occupations, Skilled Trades Occupations, Caring/Leisure/Other Service Occupations, Sales/Customer Service Occupations, Process/Plant/Machine Operatives, Elementary Occupations	Twitter	Language: Neural Clusters, Neural Embeddings, NPMI Clusters, SVD Word Embeddings, Textual Features User Features (e.g. No. Followers, No. Friends, No. Times Listed, Proportion of Tweets in English)	5191	10796836	Arts - archival, stencil, canvas, minimalist, illustration, paintings, abstract, design, print, collection, poster, painting, custom, logo. Health - chemotherapy, diagnosis, disease, inflammation, patients, mrse, risk, cancer, mental, stress, patients. Beauty care - exfoliating, cleanser, hydrating, moisturiser, shampoo, beauty, natural, dry, skin, massage. higher education - undergraduate, docto…	31.50-52.70					GP, Log-R, SVM	Conference	International Joint Conference on Natural Language Processing	B/B2	Preoţiuc-Pietro, D., Lampos, V., & Aletras, N. (2015). An analysis of the user occupational class through Twitter content. The Association for Computational Linguistics.
Proserpio, D., Counts, S., & Jain, A.	2016	Unemployment (Unemployment, Employment, Random)	Twitter	Language: LIWC	180,594 (Employment Dataset) 250,000 (Random Sample) 51,158 (Unemployment Dataset)		NR						R	Conference	Conference on Web Science	NR	Proserpio, D., Counts, S., & Jain, A. (2016, May). The psychology of job loss: using social media data to characterize and predict unemployment. In Proceedings of the 8th ACM Conference on Web Science (pp. 223-232). ACM.
Sloan, L., Morgan, J., Housley, W., Williams, M., Edwards, A., Burnap, P., & Rana, O.	2013	7 Classes: 1. Higher managerial, administrative and professional occupations, 2 Lower managerial, administrative and professional occupations, 3 Intermediate occupations, 4 Small employers and own account workers, 5 Lower supervisory and technical occupations, 6 Semi-routine occupations, 7 Routine occupations	Twitter	Meta-data	32032		NR						NR	Journal	Plos One	Q1	Sloan, L., Morgan, J., Housley, W., Williams, M., Edwards, A., Burnap, P., & Rana, O. (2013). Knowing the tweeters: Deriving sociologically relevant demographics from Twitter. Sociological research online, 18(3), 1-11.
Sloan, L., & Morgan, J.	2015	7 Classes: 1. Higher managerial, administrative and professional occupations, 2 Lower managerial, administrative and professional occupations, 3 Intermediate occupations, 4 Small employers and own account workers, 5 Lower supervisory and technical occupations, 6 Semi-routine occupations, 7 Routine occupations	Twitter	Tweets	30,030,446 (Dataset 1) 23,789,264 (Dataset 2)		NR						NR	Journal	Plos One	Q1	Sloan, L., & Morgan, J. (2015). Who tweets with their location? Understanding the relationship between demographic characteristics and the use of geoservices and geotagging on Twitter. PloS one, 10(11), e0142209.
Sloan, L.	2017	7 Classes: 1. Higher managerial, administrative and professional occupations, 2 Lower managerial, administrative and professional occupations, 3 Intermediate occupations, 4 Small employers and own account workers, 5 Lower supervisory and technical occupations, 6 Semi-routine occupations, 7 Routine occupations	Twitter	Tweets	4328		NR						NR	Journal	Social Media and Society	Q1	Sloan, L. (2017). Who tweets in the United Kingdom? Profiling the Twitter population using the British social attitudes survey 2015. Social Media+ Society, 3(1), 2056305117698981.
Solomon, A., Bar, A., Yanai, C., Shapira, B., & Rokach, L.	2018	Academic Faculty: No, Yes	Smartphones	GPS Sensor Data	81	185,032 (CARS Dataset)	NR	51.85-74.07					Log-R, NB, DT, SVM, RF	Conference	Conference on User Modelling, Adaptation and Personalization	B1	Solomon, A., Bar, A., Yanai, C., Shapira, B., & Rokach, L. (2018, July). Predict Demographic Information Using Word2vec on Spatial Trajectories. In Proceedings of the 26th Conference on User Modeling, Adaptation and Personalization(pp. 331-339). ACM.
Ying, J. J., Chang, Y., Huang, C., & Tseng, V. S.	2012	Employee Exercising Executive Functions, Employee Without Executive Function, PhD Student, Training	Smartphones	Behavioural Features, Environment Features	80		NR	42.92-78.33					AO, JRip, RS, RF	Conference	International Conference on Pervasive Computing	A/A2	Ying, J. J., Chang, Y., Huang, C., & Tseng, V. S. (2012). Demographic Prediction Based on User ’ s Mobile Behaviors. Nokia, 2012(1), 1–6.
Zhong, E., Tan, B., Mo, K., & Yang, Q.	2013	Employee Exercising Executive Functions, Employee Without Executive Function, PhD Student, Training	Smartphones	Acceleration, Applications, Bluetooth, Calendar, Call Logs, Contacts, Distance, GSM, Media, Mediaplay, Process, System, Wireless LAN, Visit	80		No. calendar events during 4.00pm, No. mediaplay records during 10.00am, Usage frequency of the most used application	39.72-78.08					GBDT, J48, Log-R, RF, SVM	Journal	Pervasive and Mobile Computing	Q1	Zhong, E., Tan, B., Mo, K., & Yang, Q. (2013). User demographics prediction based on mobile data. Pervasive and Mobile Computing, 9(6), 823-837.
