# Supplementary material for: What demographic attributes do our digital footprints reveal? A systematic review
Source: PLoS One. 2018 Nov 28;13(11):e0207112. doi: 10.1371/journal.pone.0207112 (PMC6261568; doi:10.1371/journal.pone.0207112)
Supplement: S14 Table — (XLSX) [file pone.0207112.s014.xlsx]

## Sheet: Health
Study	Year	Classes	Platform	Predictors/Features	No. Users	No. Digital Traces	Top Predictors	Accuracy %	AUC	F-score	Precision	Recall	Classifiers/Methods Used	Article Type	Conference/Journal Title	Quality	Reference
Jurgens, D., Tsvetkov, Y., & Jurafsky, D.	2017	Diet: Paleo, Vegan, Vegetarian	Twitter	Language: Content, Styistic		9001	NR			00.29-00.32 Macro F1 00.56-00.63 Micro F1			RF	Conference	International Workshop on Social Informatics	B4	Jurgens, D., Tsvetkov, Y., & Jurafsky, D. (2017, September). Writer Profiling Without the Writer’s Text. In International Conference on Social Informatics (pp. 537-558). Springer, Cham.
Kocabey, E., Camurcu, M., Ofli, F., Aytar, Y., Marin, J., Torralba, A., & Weber, I.	2017	Weight: BMI	Reddit	Pictures	2103	2103	NR						Epsilon Support Vector Regression	Conference	ICWSM	B1	Kocabey, E., Camurcu, M., Ofli, F., Aytar, Y., Marin, J., Torralba, A., & Weber, I. (2017). Face-to-bmi: Using computer vision to infer body mass index on social media. arXiv preprint arXiv:1703.03156.
Kosinski, M., Stillwell, D., & Graepel, T.	2013	Drinking Alcohol: Yes, No Life Satisfaction: Continuous Variable Uses Drugs: Yes, No Smokes Cigarettes: Yes, No	Facebook	Likes	1,196 (Drinks Alcohol) 856 (Takes Drugs) 1,211 (Smokes Cigarettes) 2,340 (Satisfaction with life)		Alcohol Use No: Bungie, I hate going back to school after the holidays, I hate when I originally pick the right answer then change it, Not finishing a sentence because your laughing too hard about the feeling Yes: Drinking around a bonfire, Getting a text that says I miss you, Jim Beam, Tattoo Lovers Drugs Use No: inside jokes, Pau Gasol, So what animal is your bracelet, Sour candy, Swimming Yes:…		00.70 (Drinks Alcohol) 00.73 (Smokes Cigarettes) 00.65 (Uses drugs)				Lin-R (SWL), Log-R (Alcohol, Drugs, Cigarettes)	Journal	PNAS	Q1	Kosinski, M., Stillwell, D., & Graepel, T. (2013). Private traits and attributes are predictable from digital records of human behavior. Proceedings of the National Academy of Sciences of the United States of America, 110(15), 5802–5. https://doi.org/10.1073/pnas.1218772110
Wang, Y., Weber, I., & Mitra, P.	2016	Weight: lbs	Twitter	Language: LIWC, Self-description (Bio), Tweets	897		affect, article, auxverb, feel, ingest, personal pronoun, present, pronoun, social, verb						GP, SVM	Conference	International Conference on Digital Health	NR	Wang, Y., Weber, I., & Mitra, P. (2016, April). Quantified self meets social media: Sharing of weight updates on twitter. In Proceedings of the 6th International Conference on Digital Health Conference (pp. 93-97). ACM.
Wang, Z., Derr, T., Yin, D. Tang, J.	2017	Weight (Loss)	Smartphones	Network Data	10000000		BMI, initial weight, no. comments giving to normal weight users, no. followings from the opposite gender users, no. followings giving to overweight users, no. mentions freceived fom other users, ratio of followings from the overweight users						Lasso regression	Conference	International Conference on Information and Knowledge Management	A	Wang, Z., Derr, T., Yin, D. Tang, J. (2017) Understanding and Predicting Weight Loss with Mobile Social Networking Data
Weber, I., & Achananuparp, P.	2016	Weight (Diet Success): Below target, Above target, On-target	MyFitnessPal	Language: Content	4251		Over weight goal: added, butter, container, dairy, lemon, mcdonalds, oil, original, pieces, wine Under weight goal: almond, banana, breast, cup, dole, egg, grapes, kroger, value, weight Over weight goal = beverage:alcohol, dessert:cake, preparation:fry, staple:wheat:pizza, meat:pork, dessert, staple:other_cereal, coconut_oil, staple:root_and_tuber, staple:wheat:bread. Under weight goal = meat:tur…	64.70-67.30			00.65-00.68	00.65-00.66	SVM	Conference	Pacific Symposium on Biocomputing	A1/C	Weber, I., & Achananuparp, P. (2016). Insights from machine-learned diet success prediction. In Biocomputing 2016: Proceedings of the Pacific Symposium (pp. 540-551).
Weiss, G. M., & Lockhart, J. W.	2011	Height: Short, Medium, Tall Weight: Light, Medium, Heavy	Smartphones	Ave. Acceleration Value, Ave. Absolute Difference, Ave. Resultant, Acceleration, Binned Distribution, Time Between Peaks,Standard Deviation	70		NR	52.40-85.70 (Height) 51.30-78.90 (Weight)					J48, Ibk nearerst neighbour, multilayer perceptron neural network	Conference	Knowledge Discovery from Sensor Data Workshop, ACM	NR	Weiss, G. M., & Lockhart, J. W. (2011, August). Identifying user traits by mining smart phone accelerometer data. In Proceedings of the Fifth International Workshop on Knowledge Discovery from Sensor Data (pp. 61-69). ACM.
Volkova, S., & Bachrach, Y.	2015	Life Satisfaction: Dissatisfied, Satisfied	Twitter	Language: Lexical, Lexicon, Negation, Postags, Stylistic	123513	24919528	NR		00.72				Log-R	Journal	Cyberpsychology, Behaviour and Social Networking	Q1	Volkova, S., & Bachrach, Y. (2015). On Predicting Sociodemographic Traits and Emotions from Communications in Social Networks and Their Implications to Online Self-Disclosure. Cyberpsychology, Behavior and Social Networking, 18(12), 726–36. https://doi.org/10.1089/cyber.2014.0609
Volkova, S., Bachrach, Y., & Van Durme, B.	2016	Life Satisfaction: Dissatisfied, Satisfied	Twitter	Language: Content, Context	4129	835800	NR		00.60-00.72				Log-R	Conference	Big Data Computing Service and Applictions	NR	Volkova, S., Bachrach, Y., & Van Durme, B. (2016, March). Mining user interests to predict perceived psycho-demographic traits on Twitter. In Big Data Computing Service and Applications (BigDataService), 2016 IEEE Second International Conference on (pp. 36-43). IEEE.
