# Supplementary material for: What demographic attributes do our digital footprints reveal? A systematic review
Source: PLoS One. 2018 Nov 28;13(11):e0207112. doi: 10.1371/journal.pone.0207112 (PMC6261568; doi:10.1371/journal.pone.0207112)
Supplement: S15 Table — (XLSX) [file pone.0207112.s015.xlsx]

## Sheet: Social Class
Authors	Year	Classes	Platform	Predictors/Features	No. Users	No. Digital Traces	Top Predictors	Accuracy %	AUC	F-score	Classifiers/Methods Used	Article Type	Conference/Journal Title	Quality	Reference
Borges, G. R., Almeida, J. M., & Pappa, G. L.	2014	Social Class: Upper, Middle, Lower, Undefined	Twitter, Foursquare	Language: Tweets	15435		NR	57.09-73.74		0.57-0.76	MNB, SVM, RF	Conference	SNAKDD	NR	Borges, G. R., Almeida, J. M., & Pappa, G. L. (2014, August). Inferring user social class in online social networks. In Proceedings of the 8th Workshop on Social Network Mining and Analysis (p. 10). ACM.
