# Supplementary material for: What demographic attributes do our digital footprints reveal? A systematic review
Source: PLoS One. 2018 Nov 28;13(11):e0207112. doi: 10.1371/journal.pone.0207112 (PMC6261568; doi:10.1371/journal.pone.0207112)
Supplement: S16 Table — (XLSX) [file pone.0207112.s016.xlsx]

## Sheet: Classifier Codes
Code	Classifier
AAMA	Apriori association mining algorithm
AB	AdaBoost
ABDT	AdaBoost Decision Tree
ABM1	AdaBoostM1
ANN	Artificial Neural Networks
AO	Author's Own
ARW	Absorbing Random Walk
AS	Associative Classification
ASC	Attribute Selected Classifier
B	Bayesian
BAG	Bagging
BAGT	Bagging Tree
BBMM	Belief Based Mixture Modelling
BC	Batch Classification
BEN	Bilinear Elastic Net
BFT	Best First Tree
BLog-R	Bayesian Logisic Regression
BM Log-R	Bayesian Multinomial Loistic Regression
BN	Bayes Network
BNB	Bernoulli Naïve Bayes
BOOST	Boosting
BP	Back Propagation
BTR	Boosted Tree Regression
BW2	Balanced Winnow 2
C4.5	C4.5
CA	Clauset's Algorithm
CART	Classification and Regression Tree
CNN	Convolutional Neural Networks
CP	Class Prior
CR	Covering Rules
CRF	Conditional Random Fields
D-Table	Decision Table
DA	Discriminant Analysis
DAN	Deep Averaging Networks
DMMMT	Deep Multi-modal Multi-task
DMNB	Discriminitive Multinomial Naïve Bayes
DS	Decision Stump
DT	Decision Tree
EB	Early Branching
EN	Elastic Net
ENR	Elastic Net Regression
FFNN	Feed-forward Neural Network
FGM	Factor Graph Model
FPG	FPGrowth Algorithm
GBDT	Gradient Boosted Decision Trees
GMM	Gaussian Mixture Model
GP	Gaussian Process
GRBFNN	Gaussian Radial Basis Function Neural Network
GSV	Gaussian Super Vector
HMM	Hidden Markov Models
HOSVD	Higher Order Singular Value Decomposition
IBL	Instance-based Learning
J48	J48
JRip	JRip
kNN	K Nearest Neighbours Algorithm
L	Logistic
LADT	LADTree
LASSO	Lasso Regression
LB	Late Branching
LB	Logic Boost
LDA	Latent Dirichlet Allocation
Lin-DA	Linear Discriminant Analysis
Lin-R	Linear Regression
Lin-SVC	Linear SVC
LLDA	LLDA Classifier
LM	LambdaMART
LMT	Logic Model Trees
Log-Lin-R	Logistic Linear Regression
Log-R	Logistic Regression
Log-R L2	Logistic Regression with L2 Regularization
LSA	Latent Semantic Analysis
LSI	Latent Semantic Indexing
M5P	M5P Tree
MBWNN	Modified Balanced Winnow Neural Network
MCC	Multi-class Classifier
MCNN	Multi-class Neural Networks
ME	Maximum Entropy
MENR	Multi-task Elastic Net Regression
MLE	Maximum Likelihood Estimation
MLog-R	Multinomial Logistic Regression
MLP	Multilayer Perceptron
MNB	Multinomial Naïve Bayes
MSA	Max Sum Algorithm
MTBM	Multi-task Bilinear Model
MTL	Multi-task Learning
NB	Naïve Bayes
NB-DT	Naïve Bayes Decision Tree
NBM	Naïve Bayes Multinomial
NC	Naïve Classifier
NNMF	Non-negative Matrix Factorization
NNTF	Non-negative Tensor Factorization
OneR	OneR
P	Perceptron
PART	PART
PCA	Principle Component Analysis
PEM	Parallel Ensemble Method
PNN	Probabilistic Neural Network
PR	Poisson Regression
PRIM	Patient Rule Induction Method
PSSL	Partially Supervised Soft Label
QDA	Quadratic Discriminant Analysis
R	Regression
RANSAC	Random Sample Consensus
RB	Rule Based
RBFN	Radial Basis Function Network
RBFNN	Radial Basis Function Neural Network
RBM	Restrited Boltzmann Machine
RDA	Reaction Diffusion Algorithm
RELM	Regularized Extreme Learning Machine
REPT	RepTree
RF	Random Forest
RNN	Recurrent Neural Networks
RR	Ridge Regression
RS	Random Subspace
RT	Random Tree
RTF	Rotation Forest
SC	Simple Cart
SDG	Stochastic Gradient Descent for learning binary class SVM
SG	Skip Gram
SL	Simple Logistic
SLog-R	Simple Logistic Regression
SMO	Support Vector Machines trained using Platt's sequential minimal optimization algorithm (SMO)
SVM	Support Vector Machine
SVMR	Support Vector Machine Regression
UBM	Universal Background Model
W	Winnow
WLR	Weighted Label Regularization
XGB	XGBoost
